# Supplementary material for: Screening tools for early identification of children with developmental delay in low- and middle-income countries: a systematic review
Source: PubMed Central journal article supplement — BMJ Open. 2020 Nov 23;10(11):e038182. doi: 10.1136/bmjopen-2020-038182 (PMC7684835; doi:10.1136/bmjopen-2020-038182), 2020-11-23
Supplement: bmjopen-2020-038182.draft_revisions.pdf [file bmjopen-2020-038182.draft_revisions.pdf]

# BMJ Open

BMJ Open is committed to open peer review. As part of this commitment we make the peer review history of every article we publish publicly available.

When an article is published we post the peer reviewers' comments and the authors' responses online. We also post the versions of the paper that were used during peer review. These are the versions that the peer review comments apply to.

The versions of the paper that follow are the versions that were submitted during the peer review process. They are not the versions of record or the final published versions. They should not be cited or distributed as the published version of this manuscript.

BMJ Open is an open access journal and the full, final, typeset and author-corrected version of record of the manuscript is available on our site with no access controls, subscription charges or pay-per-view fees (<http://bmjopen.bmj.com>).

If you have any questions on BMJ Open's open peer review process please email [info.bmjopen@bmj.com](mailto:info.bmjopen@bmj.com)

# BMJ Open

## Screening Tools for Early Identification of Children with Developmental Delay in Low- and Middle-income Countries: A Systematic Review

|                               |                                                                                                                                                                                                                                                                                                                                                                                                                                                                                                                                                                                                                                                                                                                                                                                                                                                                                                                                                      |
|-------------------------------|------------------------------------------------------------------------------------------------------------------------------------------------------------------------------------------------------------------------------------------------------------------------------------------------------------------------------------------------------------------------------------------------------------------------------------------------------------------------------------------------------------------------------------------------------------------------------------------------------------------------------------------------------------------------------------------------------------------------------------------------------------------------------------------------------------------------------------------------------------------------------------------------------------------------------------------------------|
| Journal:                      | <i>BMJ Open</i>                                                                                                                                                                                                                                                                                                                                                                                                                                                                                                                                                                                                                                                                                                                                                                                                                                                                                                                                      |
| Manuscript ID                 | bmjopen-2020-038182                                                                                                                                                                                                                                                                                                                                                                                                                                                                                                                                                                                                                                                                                                                                                                                                                                                                                                                                  |
| Article Type:                 | Original research                                                                                                                                                                                                                                                                                                                                                                                                                                                                                                                                                                                                                                                                                                                                                                                                                                                                                                                                    |
| Date Submitted by the Author: | 02-Mar-2020                                                                                                                                                                                                                                                                                                                                                                                                                                                                                                                                                                                                                                                                                                                                                                                                                                                                                                                                          |
| Complete List of Authors:     | Faruk, Tasnuva; University of South Asia, Asian Institute of Disability and Development; Independent University, School of Public Health King, Catherine; The University of Sydney, National Centre for Immunisation Research and Surveillance (NCIRS), The Children's Hospital at Westmead<br>Muhit, Mohammad; University of South Asia, Asian Institute of Disability and Development ; CSF Global<br>Islam, Md Kafiul; Independent University, Electrical and Electronic Engineering<br>Baset, Kamran; Independent University, School of Public Health; BRAC, Road Safety and Driving School<br>Badawi, Nadia; University of Sydney SDN, Cerebral Palsy Alliance Research Institute; University of Sydney SDN, Discipline of Child and Adolescent Health, Sydney Medical School<br>Khandaker, Gulam; University of South Asia, Asian Institute of Disability and Development ; Central Queensland Hospital and Health Service, Public Health Unit |
| Keywords:                     | Developmental neurology & neurodisability < PAEDIATRICS, Paediatric neurology < PAEDIATRICS, Neonatal intensive & critical care < INTENSIVE & CRITICAL CARE, Neurological injury < NEUROLOGY, Community child health < PAEDIATRICS, PUBLIC HEALTH                                                                                                                                                                                                                                                                                                                                                                                                                                                                                                                                                                                                                                                                                                    |
|                               |                                                                                                                                                                                                                                                                                                                                                                                                                                                                                                                                                                                                                                                                                                                                                                                                                                                                                                                                                      |

SCHOLARONE™  
Manuscripts

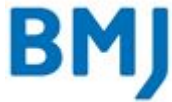

I, the Submitting Author has the right to grant and does grant on behalf of all authors of the Work (as defined in the below author licence), an exclusive licence and/or a non-exclusive licence for contributions from authors who are: i) UK Crown employees; ii) where BMJ has agreed a CC-BY licence shall apply, and/or iii) in accordance with the terms applicable for US Federal Government officers or employees acting as part of their official duties; on a worldwide, perpetual, irrevocable, royalty-free basis to BMJ Publishing Group Ltd ("BMJ") its licensees and where the relevant Journal is co-owned by BMJ to the co-owners of the Journal, to publish the Work in this journal and any other BMJ products and to exploit all rights, as set out in our [licence](#).

The Submitting Author accepts and understands that any supply made under these terms is made by BMJ to the Submitting Author unless you are acting as an employee on behalf of your employer or a postgraduate student of an affiliated institution which is paying any applicable article publishing charge ("APC") for Open Access articles. Where the Submitting Author wishes to make the Work available on an Open Access basis (and intends to pay the relevant APC), the terms of reuse of such Open Access shall be governed by a Creative Commons licence – details of these licences and which [Creative Commons](#) licence will apply to this Work are set out in our licence referred to above.

Other than as permitted in any relevant BMJ Author's Self Archiving Policies, I confirm this Work has not been accepted for publication elsewhere, is not being considered for publication elsewhere and does not duplicate material already published. I confirm all authors consent to publication of this Work and authorise the granting of this licence.

**Title:** Screening Tools for Early Identification of Children with Developmental Delay in Low- and Middle-income Countries: A Systematic Review

**Corresponding Author:** Dr. Tasnuva Faruk

Postal Address: Asian Institute of Disability and Development (AIDD), University of South Asia, House 78, Road 14, Block B, Banani, Dhaka-1213, Bangladesh.

Telephone: +880-1717440926; E-mail: [meghbalika04@gmail.com](mailto:meghbalika04@gmail.com)

**All Authors:** Tasnuva Faruk<sup>1,2</sup>, Catherine King<sup>3</sup>, Mohammad Muhit<sup>1,4</sup>, Md Kafiul Islam<sup>5</sup>, Kamran ul Baset<sup>2,6</sup>, Nadia Badawi<sup>7,8</sup>, and Gulam Khandaker<sup>1,4,8,9</sup>

1. Asian Institute of Disability and Development (AIDD), University of South Asia, Dhaka, Bangladesh;
2. School of Public Health, Independent University, Bangladesh, Dhaka, Bangladesh;
3. National Centre for Immunisation Research and Surveillance (NCIRS), The Children's Hospital at Westmead, Sydney, Australia;
4. CSF Global, Dhaka, Bangladesh;
5. Department of Electrical and Electronic Engineering, Independent University, Bangladesh, Dhaka, Bangladesh;
6. Road Safety and Driving School, BRAC, Dhaka, Bangladesh;
7. Cerebral Palsy Alliance Research Institute, University of Sydney, Sydney, Australia;
8. Discipline of Child and Adolescent Health, Sydney Medical School, University of Sydney, Sydney, Australia;
9. Public Health Unit, Central Queensland Hospital and Health Service, Rockhampton, Queensland, Australia.

**Word Count:** 5550

## Screening Tools for Early Identification of Children with Developmental Delay in Low- and Middle-income Countries: A Systematic Review

Article category: Review Article

### ABSTRACT

**Objective:** To identify and report the screening tools used for early identification of developmental delay in Low-and Middle-Income Countries.

**Design:** Systematic review

**Data sources:** Four bibliographic databases: Medline (1946 - Week 4 February 2018), Embase (1974 - 06 March 2018), Scopus (1823 - March 2018), and PsycINFO (1987 to April Week 4 2019) were searched using standard methods.

**Eligibility criteria:** Peer-reviewed original articles published in English addressing validated culturally sensitive developmental screening tools among children aged < 5 years were included in this review.

**Data extraction and synthesis:** Two authors performed the full-text reviews and extraction of data. PRISMA statement was used to guide the systematic review. Methodological quality was assessed using the Quality Assessment Tool for Diagnostic Accuracy Studies-2 and Newcastle-Ottawa Scale for cross-sectional studies. Data extraction and analysis were performed using MS Excel. Meta-analysis was not possible due to the heterogeneity of the study setting and findings.

**Results:** We identified 2707 articles, of which thirteen studies from seven countries, reporting twelve screening tools, were selected for qualitative synthesis. Two cultural contexts were explored; Asian (5 countries) and African (2 countries). Study sites included tertiary hospital, primary healthcare centre, nursery and community. Nine general screening tools, two motor tools and one speech and language tool were identified. Half of them found

1  
2  
3 to be parent-completed ones. Five screening tools (Ages and Stages Questionnaire-2, Infant  
4 Neurological International Battery, Language Evaluation Scale Trivandrum, Lucknow  
5 Development Screen 0-3, and New Delhi – Development Screening Questionnaire) reported  
6 relatively higher sensitivity (83.3%-100%) and specificity (73.1%-88.7%).  
7  
8  
9

10  
11  
12 **Conclusions:** Limited number of culturally sensitive developmental screening tools were  
13 validated for children aged <5 year in Low-and Middle-Income Countries. Revising existing  
14 screening tools in different ethnic and cultural settings and subsequent validation with  
15 normative value should be a research priority.  
16  
17  
18  
19

20  
21  
22 **PROSPERO registration number** CRD42018095232  
23

24  
25 **Key words:** Developmental delay, Disability, Screening, Early diagnosis,  
26 Rehabilitation, Low and Middle-Income Countries  
27  
28  
29  
30  
31  
32

### 33 **Strengths and limitations of this study**

- 34  
35 ➤ This review puts together extensive literature searches on original studies conducted  
36 among under-5 children from LMICs reporting validity of developmental screening  
37 tools in early diagnosis of developmental delay.  
38  
39
- 40  
41 ➤ Meta-analysis was not possible due to the heterogeneity of the study setting and  
42 findings.  
43  
44
- 45  
46 ➤ Critical evaluation of the available screening tools in terms of diagnostic accuracy  
47 was not possible to perform due to the unavailability of the necessary information.  
48  
49  
50  
51  
52  
53  
54  
55  
56  
57  
58  
59  
60

## INTRODUCTION

Developmental delay is a condition where children exhibit significant variation in achieving developmental milestones as expected for their actual or adjusted age.[1-3] Complications at birth including premature birth; brain trauma and encephalitis; severe medical problems after birth; inborn metabolic errors; genetic or chromosomal abnormalities; inadequate stimulation; malnutrition; iron deficiency anaemia; chronic illness; adverse environmental, familiar and psychological states may lead to developmental delay.[4-6] Although the condition itself may not be permanent, it can provide a foundation for recognizing children who might have more severe and permanent health conditions i.e. developmental disabilities. Apart from developmental delay, developmental disability is considered as a severe, chronic disability originating at birth or during childhood, expected to continue indefinitely, and substantially restricts the individual's functioning in several major life activities.[2, 7] Examples of developmental disabilities include autism spectrum disorder, behavioural disorders, cerebral palsy, down syndrome, foetal alcohol syndrome, intellectual disability, etc. As a predictive of above-mentioned learning, movement and behavioural disorders, the developmental delay can be easily identified during the preschool period (i.e. before the age of 5 years).[8] There is a long-term financial impact on society in terms of healthcare, educational support and other special services related to developmental delay and/ disability. This is because the affected children require substantial resources and increased cost over their lifespan compared to those without such conditions.[9] This further accentuates the significance of early identification to initiate appropriate interventions and/ rehabilitations with the intention of preventing further delays, stimulating emerging skills and creating a more encouraging and protective surroundings.[5]

In the last few decades, successful implementation of World Health Organization's (WHO's) key health services[10] regarding "The Countdown to 2015 Initiatives" resulted in

1  
2  
3 the reduction of the neonatal mortality rate from 37 deaths per 1000 live births in 1990 to 19  
4 per 1000 live births in 2016, worldwide with a projection of further future reductions.[11, 12]  
5  
6 Among the survivors, more than 250 million under-5 children from Low-and Middle-Income  
7  
8 Countries (LMICs) are not fulfilling their developmental potential in cognitive, motor, and  
9  
10 social-emotional domains due to poor nutrition, poverty and conflicts.[4, 13, 14] In addition  
11  
12 to them, there is an undetected number of surviving children suffering from various forms of  
13  
14 developmental delay presumably due to brain injury during the foetal, perinatal and post-  
15  
16 neonatal period.[15] Nation-wide population-based retrospective studies conducted in Taiwan  
17  
18 discovered that, with time, while the neonatal mortality rate is reducing, the prevalence of  
19  
20 developmental delay is gradually increasing (as shown in Fig. 1).[16, 17]  
21  
22  
23  
24  
25  
26  
27  
28

29 In LMICs, parents and caregivers with strong cultural beliefs regarding health not  
30  
31 only remain ignorant of the child's developmental deficit but also about the future impact of  
32  
33 the condition.[18] The perspective on developmental disability varies from one culture to  
34  
35 another. Along with economic, geographical, social factors, it often becomes a barrier to  
36  
37 healthcare accessibility for children with disability.[19] In Chinese culture, having children  
38  
39 with disability is often considered shameful for the family. In Southeast Asian cultures,  
40  
41 parents often face social deprivation due to the stigma related to developmental  
42  
43 disability.[20] Moreover, cultural believe often holds control over treatment approaches for  
44  
45 developmental delay or disabilities, including: (1) whether to seek help or not; (2) which  
46  
47 treatment option to choose; (3) parental expectations for their child; (4) interpersonal  
48  
49 relationship between caregiver and healthcare professionals, etc.[21] One of the biggest  
50  
51 challenges in early identification of developmental delay or disability is providing culturally  
52  
53 sensitive screening tools, which not only include cultural perception of delay and/or disability  
54  
55 but also easily adaptable across the various cultural/ nation.[22] Among the developmental  
56  
57  
58  
59  
60



1  
2  
3 domains, social development is culturally specific and difficult to adapt, whereas the gross  
4  
5 motor domain is easier to adapt culturally.[23]  
6  
7

8         Developmental screening is the first step of the comprehensive diagnostic procedure  
9  
10 for secondary prevention and early identification of developmental delay.[24-26] A validated  
11  
12 developmental screening tool is thus very important. The standardized tools available from  
13  
14 western countries provide well-validated assessment in their own settings. However, the  
15  
16 transfer of such western-based tools to non-western countries is linked with substantial  
17  
18 limitations in terms of score interpretation and feasibility of their use in resource-constrained  
19  
20 settings such as in LMICs.[22] In the developed countries, early identification of  
21  
22 developmental delay is considered as mandatory part of good healthcare practice which is  
23  
24 recommended by the American Academy of Paediatrics.[25] Benefits of early identification  
25  
26 developmental delay are as follows: (1) augmenting child's future cognitive, motor, and  
27  
28 social development while the nervous system is still pliable and receptive; (2) leading to  
29  
30 definite diagnosis and effective therapy for conditions where definitive treatment is available;  
31  
32 (3) improving overall outcome of the child for conditions that cannot be reversed; (4)  
33  
34 reducing long term disability; (5) improving quality of life of the child; (6) enabling families  
35  
36 to be resourceful for successful functioning; and (7) reducing the social cost.[9, 25, 27-29] In  
37  
38 contrast, in LMICs, most teaching and training programs of health professionals are still  
39  
40 concentrated on acute illness and growth aspects of children rather than a developmental  
41  
42 perspective, resulting in limited attention in developmental delay.[25] Also, in these  
43  
44 geographical areas, strong cultural beliefs and superstitions regarding child healthcare and  
45  
46 development may be present among parents. The combined effect of these two factors often  
47  
48 results in overlooking or delayed the diagnosis of developmental concerns.  
49  
50  
51  
52  
53  
54  
55  
56  
57  
58  
59  
60

1  
2  
3 The purpose of this study was to look for the screening tools which have been used  
4 and validated for early identification of developmental delay in LMICs, to report how  
5 effective they are for early identification of developmental delay in terms of validity, and to  
6 identify areas for future research.  
7  
8  
9  
10  
11  
12  
13

## 14 **METHODS**

### 15 **Data sources and search strategy**

16  
17 To locate items on screening tools for early identification of developmental delay among  
18 children in low and middle-income countries, literature searches were undertaken by an  
19 experienced medical librarian (Dr. Catherine King) in four bibliographic databases. The  
20 databases searched were: OVID Medline (1946 - Week 4 February 2018), OVID Embase  
21 (1974 - 06 March 2018), SCOPUS (1823 - March 2018), and PsycINFO (1987 to April Week  
22 4 2019). Search terms included database-specific thesaurus terms where available such as  
23 ‘Mass Screening’, ‘Diagnosis’, ‘Surveys and Questionnaires’, ‘Neurodevelopmental  
24 Disorders’, ‘Motor Disorders’, ‘Cerebral Palsy’, ‘Cognitive Dysfunction’, and  
25 ‘Communication Disorders’ as well as relevant associated text word terms. These were  
26 combined with low and middle-income country terms and infant, child and adolescent terms.  
27 To minimize the introduction of bias, no publication date and language limits were used. The  
28 date of the latest search was 03.05.19. The Medline search strategy could be found online as  
29 Supplementary Table S1.  
30  
31  
32  
33  
34  
35  
36  
37  
38  
39  
40  
41  
42  
43  
44  
45  
46  
47  
48

49 In addition to bibliographic database searches, we manually checked the reference  
50 lists of articles included in the full-text review. We also contacted experts in the field to  
51 identify any additional studies or information.  
52  
53  
54  
55  
56  
57  
58  
59  
60

### **Selection criteria**

Study inclusion criteria were: (1) Children aged less than 5 years who were at risk of developmental delay; (2) Original studies (both observational and experimental); (3) Study where single, as well as multiple developmental domains, were examined; (4) Studies conducted only in LMICs. The exclusion criteria were: (1) Studies conducted on diagnosed cases of developmental delay; (2) Studies focusing on autism spectrum disorder and other behavioural disorders; (3) Studies conducted among HIV exposed children; (4) Studies on developmental delay among children aged more than 5 years; (5) Interventional studies on developmental delay; (6) Studies on developmental delay published before 1946; (7) Article published in languages other than English; (8) Conference papers, letter to the editor, protocols, systematic reviews and ongoing studies; (9) Study conducted among children of eligible ethnic origin but in different country settings (i.e. children adopted from LMICs but study conducted in higher income countries).

LMICs consist of countries belonging to three World Bank income groups (low, lower-middle, upper-middle, and high) of WHO's Member States. The classification is based on the estimated per capita gross national income. We have used the World Bank's country classifications by income level (2018-2019) in this review.[30, 31]

### **Study selection, data extraction and quality appraisal**

We carried out the following steps to decide on the studies: (1) Searching the above-mentioned databases using similar search strategy; (2) Deduplication and merging search results using the EndNote bibliographic software; (3) Examining titles and abstracts to remove obviously irrelevant reports; (4) Retrieving and examining the full text reports of eligible studies; (5) Making final decisions on study inclusion and proceeding for data collection. Extracted information included: publication year, the country where the study was

1  
2  
3 conducted, the name of the screening tool, the reference standard tool(s) against which the  
4 screening tool was validated, study design, study setting, sample size, sampling technique,  
5  
6 the age of the participants, selection criteria and sensitivity-specificity of the screening tools.  
7  
8 Disagreements have been resolved through discussion. We used the Preferred Reporting  
9  
10 Items for Systematic Reviews and Meta-Analyses (PRISMA) statement, including 27- item  
11  
12 PRISMA checklist to guide the systematic review.[32] The quality of the selected studies was  
13  
14 assessed using the Quality Assessment Tool for Diagnostic Accuracy Studies-2[33]  
15  
16 (Supplementary Table S2) and Newcastle-Ottawa Scale for cross-sectional studies[34]  
17  
18 (Supplementary Table S3).  
19  
20  
21  
22  
23  
24  
25

### 26 **Data analysis**

27  
28 Individual study findings were reported including the country, study design, study setting,  
29  
30 sample size, sampling technique, proportions and age range of participants, sensitivity-  
31  
32 specificity of the developmental screening tools etc. Data extraction and analysis were  
33  
34 performed using MS Excel. We were unable to perform a meta-analysis due to the  
35  
36 heterogeneity of the study setting and findings.  
37  
38  
39  
40  
41

### 42 **Patient and Public Involvement**

43  
44 No patient involved.  
45  
46  
47  
48

### 49 **Protocol registration and ethical approval**

50  
51 The protocol of this systematic review has been registered in PROSPERO (registration  
52  
53 number CRD42018095232). As this systematic review did not directly involve human or  
54  
55 animal subjects, or access to medical records; ethical approval was not required.  
56  
57  
58  
59  
60

## RESULTS

### Search results

The initial search retrieved 2707 records. We have found 2698 records from four bibliographic databases (1313 from OVID Medline, 1012 from OVID Embase, 287 from Scopus and 86 from PsycINFO). Nine records were located by reviewing the reference lists of fully extracted articles and consulting expert researchers in this area. There were 2211 unique records once duplicates were removed. Following the screening of title and abstracts for articles, which described the validation of tools to screen out developmentally delayed children, 41 articles were selected for further evaluation. After further review, 13 articles were selected for inclusion in study.[35-47] A PRISMA flow diagram has been prepared to illustrate the study selection process (as shown in Fig. 2).

### Summary of the included studies

All of the thirteen studies included for qualitative synthesis were original articles published in English, with a publication date range from 1997 to 2017 inclusive. Six studies originated in “South Asia”, [35, 36, 42-44, 47] three studies from “East Asia and Pacific”, [39-41] three studies from “Sub-Saharan Africa”, [38, 45, 46] one study from the “Middle East and North Africa” [37] region of the World Bank. No eligible studies were found from the “Latin America and Caribbean”, or “Europe and Central Asia” region. In total, twelve developmental screening tools were used in seven countries. Among the twelve screening tools, Language Evaluation Scale Trivandrum for 0-3 years LEST (LEST 0-3) focuses on language domain; Infant Neurological International Battery (INFANIB) and Little Developmental Coordination Disorder Questionnaire (Little DCDQ) work on motor domains. The remaining tools are general developmental screening tools. A brief description of the selected screening tools is provided in Table 1.

**Table 1:** Brief description of the selected screening tools

|                          | Ages and Stages Questionnaire (ASQ)                                      | Development Screening Questionnaire (DSQ)                                                 | Infant Neurological International Battery (INFANIB) | Language Evaluation Scale Trivandrum for 0-3 years (LEST 0-3) | Little Developmental Coordination Disorder Questionnaire (Little DCDQ) | Lucknow Developmental Screen (LDS) | Mongolian Rapid Baby Scale (MORBAS)                                                                                        | New Delhi – Development Screening Questionnaire (ND-DSQ)  | Parent Evaluation of Developmental Status (PEDS)                                                                                                    | Rapid Prescreening Denver Questionnaire (R-PDQ)             | Road to Health Booklet Developmental Checklist (RTHB-DC) | Ten Questions (TQ)                         |
|--------------------------|--------------------------------------------------------------------------|-------------------------------------------------------------------------------------------|-----------------------------------------------------|---------------------------------------------------------------|------------------------------------------------------------------------|------------------------------------|----------------------------------------------------------------------------------------------------------------------------|-----------------------------------------------------------|-----------------------------------------------------------------------------------------------------------------------------------------------------|-------------------------------------------------------------|----------------------------------------------------------|--------------------------------------------|
| Country of Origin        | USA                                                                      | Bangladesh                                                                                | USA                                                 | India                                                         | Canada                                                                 | India                              | Mongolia                                                                                                                   | India                                                     | USA                                                                                                                                                 | USA                                                         | South Africa                                             | Multiple                                   |
| Study Country            | India                                                                    | Bangladesh                                                                                | Iran                                                | India                                                         | South Africa                                                           | India                              | Mongolia                                                                                                                   | India                                                     | Thailand                                                                                                                                            | India                                                       | South Africa                                             | Benin                                      |
| Concerned Age            | 1–66 months                                                              | birth to 24 months                                                                        | 0 to 18 months                                      | 0 to 3 years                                                  | 3-5 years                                                              | birth to 24 months                 | 0 to 42 months                                                                                                             | 9 to 18 months                                            | birth to 8 years                                                                                                                                    | 0-6 years                                                   | 14 weeks to 6 years                                      | 2 to 9 years                               |
| Parent-Reported Version  | Yes                                                                      | No                                                                                        | No                                                  | No                                                            | Yes                                                                    | Yes                                | No                                                                                                                         | Yes                                                       | Yes                                                                                                                                                 | No                                                          | No                                                       | Yes                                        |
| Questionnaire Type       | Q & A                                                                    | Q & A                                                                                     | Not found                                           | Chart                                                         | Q & A                                                                  | Chart                              | Written                                                                                                                    | Q & A                                                     | Q & A                                                                                                                                               | Q & A                                                       | Checklist                                                | Q & A                                      |
| Number of Questionnaires | 21 age sets                                                              | 24 age sets                                                                               | Single                                              | Single                                                        | Single                                                                 | Single                             | Single                                                                                                                     | 2 age sets                                                | Single                                                                                                                                              | 4 age sets                                                  | Single                                                   | Single                                     |
| Number of items          | 30 items                                                                 | 8 questions per set                                                                       | 20-items                                            | 33 items                                                      | 15 items                                                               | 27 item                            | 161 item                                                                                                                   | 20 items                                                  | 10 items                                                                                                                                            | 25 items                                                    | 21 items                                                 | 10 items                                   |
| Developmental Domain     | Communication, gross motor, fine motor, problem solving, personal-social | Gross motor, fine motor, vision; hearing, cognition, socialization, behaviour, and speech | Gross motor                                         | Speech and language                                           | Gross motor, fine motor                                                | Motor, mental, language, social    | Cognitive, receptive communication, expressive communication, fine motor, gross motor, social-emotional, adaptive behavior | General screening tool (domains not explicitly mentioned) | Global /cognitive, speech / expressive language, receptive language, behaviour, social-emotional, school, self-help, fine motor, gross motor, other | Gross motor, fine motor activity, personal-social, language | Gross motor, fine motor, communication, vision, hearing  | Vision, hearing, seizure, cognition, motor |

### **Participant characteristics**

All the studies involved males and females, age range 0 to 5 years. The smallest sample size was 53 and the largest was 643. The studies explored the following cultural contexts: Asian (Bangladesh, India, Iran, Mongolia, and Thailand) and African (Benin, South Africa). Selection criteria used for participation in those studies are stated in Table 2.

For peer review only

**Table 2:** Selection criteria used for participation in the studies

| Ref.                      | [35]                                                       | [36]                                                                                                                                     | [37]                              | [38]                                                                                | [39]                                                                      | [40]                                                                                                                                                                                   | [41]                                                                                                                             | [42]                                                                                                             | [43]                                                                                                            | [44]                              | [45]                                                                                           | [46]                                                                                                                              | [47]                                                   |
|---------------------------|------------------------------------------------------------|------------------------------------------------------------------------------------------------------------------------------------------|-----------------------------------|-------------------------------------------------------------------------------------|---------------------------------------------------------------------------|----------------------------------------------------------------------------------------------------------------------------------------------------------------------------------------|----------------------------------------------------------------------------------------------------------------------------------|------------------------------------------------------------------------------------------------------------------|-----------------------------------------------------------------------------------------------------------------|-----------------------------------|------------------------------------------------------------------------------------------------|-----------------------------------------------------------------------------------------------------------------------------------|--------------------------------------------------------|
|                           | <b><u>Inclusion Criteria</u></b>                           | <b><u>Inclusion Criteria</u></b>                                                                                                         | <b><u>Inclusion Criteria</u></b>  | <b><u>Inclusion Criteria</u></b>                                                    | <b><u>Inclusion Criteria</u></b>                                          | <b><u>Inclusion Criteria</u></b>                                                                                                                                                       | <b><u>Inclusion Criteria</u></b>                                                                                                 | <b><u>Inclusion Criteria</u></b>                                                                                 | <b><u>Inclusion Criteria</u></b>                                                                                | <b><u>Inclusion Criteria</u></b>  | <b><u>Inclusion Criteria</u></b>                                                               | <b><u>Inclusion Criteria</u></b>                                                                                                  | <b><u>Inclusion Criteria</u></b>                       |
|                           | Children living in the study area                          | Children attending the study hospital                                                                                                    | Children living in the study area | Afrikaans, Tswana or English speaking parents or guardian                           | Parents willing to participate                                            | Children attending the study hospital                                                                                                                                                  | Children with apparently normal development                                                                                      | Parents completed primary education<br><br>Parents able to read Hindi<br><br>Parents living with the child       | Children attending the study hospital                                                                           | Children living in the study area | Children born to mothers enrolled in “Malaria in Pregnancy Preventive Alternative Drugs” trial | Afrikaans or English speaking parents<br><br>Parents visiting the primary health care clinics<br><br>Parents asked to participate | Children whose parents/ primary caregiver gave consent |
|                           | <b><u>Exclusion Criteria</u></b>                           | <b><u>Exclusion Criteria</u></b>                                                                                                         | <b><u>Exclusion Criteria</u></b>  | <b><u>Exclusion Criteria</u></b>                                                    | <b><u>Exclusion Criteria</u></b>                                          | <b><u>Exclusion Criteria</u></b>                                                                                                                                                       | <b><u>Exclusion Criteria</u></b>                                                                                                 | <b><u>Exclusion Criteria</u></b>                                                                                 | <b><u>Exclusion Criteria</u></b>                                                                                | <b><u>Exclusion Criteria</u></b>  | <b><u>Exclusion Criteria</u></b>                                                               | <b><u>Exclusion Criteria</u></b>                                                                                                  | <b><u>Exclusion Criteria</u></b>                       |
| <b>Selection Criteria</b> | Children whose parents did not give consent to participate | Children with acute illness<br><br>Children not accompanied by parents<br><br>Children whose parents did not give consent to participate | Not applicable                    | Children suspected or diagnosed with mental retardation, autism or neuromotor delay | Chronically ill children<br><br>Previous diagnosis of developmental delay | Premature children<br><br>Previous diagnosis of developmental delay<br><br>Children with a visual/hearing problem<br><br>The accompanying parent does not understand the Thai language | Children with acute and chronic disease<br><br>Children not accompanied by a caregiver<br><br>Children with illiterate caregiver | Premature children<br><br>Children with acute severe illness<br><br>Previous diagnosis of developmental disorder | Children without a proper birth record<br><br>Children not accompanied by a caregiver at the time of evaluation | Not applicable                    | Non-singleton births                                                                           | Not applicable                                                                                                                    | Ill children<br><br>Children uncooperative for testing |



### Study characteristics

All the included studies were cross-sectional in nature. Among the thirteen studies, seven were conducted in the tertiary hospital,[36, 37, 39-43] two were conducted in the community,[35, 47] and one study each was conducted in a nursery school setting[38] and primary health care clinic setting.[46] In the remaining two studies, screening was done in the community followed by a hospital-based detailed assessment in one[44] and primary health care clinic-based assessment in another.[45]

### Validated screening tools

#### The Ages and Stages Questionnaire (ASQ)

This is a parent-completed questionnaire that could be used as a general developmental screening tool. The ASQ was designed and developed by J. Squires and D. Bricker, at the University of Oregon and can be completed in 12-18 minutes.[48] The questionnaire has 30 items focusing on five domains of child development, named gross motor, fine motor, problem-solving, communication, and personal-social. Obtaining lower scores than the cut off in any domain is considered as “screen positive”. The latest version of ASQ, ASQ-3, has 21 sets of questionnaires, appropriate for children aged 1–66 months.[49] In the study by Juneja et al., 2012; a Hindi adaptation of an older version of ASQ, (ASQ-2, which had 19 sets of questionnaires for 4 to 60 months aged children) was used in a convenience sample of 200 children divided into 4 age groups: 4, 10, 18 and 24 months, in a tertiary hospital setting.[43] Each age group consisted of 30 low risk and 20 high-risk children. High-risk status was determined by the presence of any of the following risk factors: prematurity, low birth weight, history of neonatal hospitalization, history of central nervous system infection, history of afebrile seizure, diagnosed cases of developmental disorder and chromosomal abnormalities. Children without these risk factors were treated as being in the low-risk group. Eventually, 4, 10, 18 and 24 months questionnaires of ASQ-2 were validated against

1  
2  
3 “Developmental Assessment Scales for Indian Infants (DASII)”, considered as a reference  
4 standard for developmental assessment tool among Indian children.[43] The overall  
5 sensitivity and specificity of ASQ-2 for Indian children were found to be 83.3% and 75.4%  
6 respectively.  
7  
8  
9  
10  
11  
12

### 13 Development Screening Questionnaire (DSQ)

14  
15 The DSQ was designed and developed in Bangladesh, to be administered to mothers of  
16 children from birth to 24 months of age to screen their child’s neurodevelopmental status.  
17  
18 The DSQ has 24 age sets with 8 questions per set related to eight functional domains, named:  
19 gross motor, fine motor, vision, hearing, cognition, socialization, behaviour and speech.[44]  
20  
21 Any child found to be positive on one or more functional domain is considered “screen  
22 positive”. In a study conducted in urban Bangladesh, a random sample of 197 children aged  
23 0-24 months was screened in the community with DSQ, and then a detailed developmental  
24 assessment was done in a tertiary hospital with the help of the “Rapid Neurodevelopmental  
25 Assessment” tool as the reference standard. Overall sensitivity and specificity of DSQ for  
26 under 2-year-old Bangladeshi children was found to be 47.1% and 97.2% respectively.[44]  
27  
28 Despite moderate sensitivity, the DSQ might be advantageous for resource-poor settings due  
29 to its high specificity.  
30  
31  
32  
33  
34  
35  
36  
37  
38  
39  
40  
41  
42  
43

### 44 Infant Neurological International Battery (INFANIB)

45  
46 The INFANIB was established by Ellison and Browning in 1985 to assess the gross motor  
47 function of children aged 0 to 18 months. The tool contains 20-items focusing on spasticity,  
48 vestibular function, head and trunk, French angles and legs.[50] In the study by Soleimani  
49 and Dadkhah, 2006; a consecutive sample of 6150 children were screened using INFANIB  
50 and classified as normal, transiently abnormal and abnormal. To validate the tool a random  
51 sample of 153 children from the above-mentioned groups were assessed by paediatric  
52  
53  
54  
55  
56  
57  
58  
59  
60

1  
2  
3 neurologists. It was found that overall sensitivity and specificity of INFANIB for Iranian  
4 children were 90% and 83% respectively.[37]  
5  
6  
7

#### 8 9 Language Evaluation Scale Trivandrum (LEST 0-3)

10  
11 Designed and developed at the Child Development Centre of the Trivandrum Government  
12 Medical College, India, LEST (0-3) is a 33 items screening tool to screen out language delay  
13 among 0 to 3 years old children.[47] The LEST (0-3) was validated against the “Receptive-  
14 Expressive Emergent Language Scale” tool as a reference standard in a community sample of  
15 643 Indian children aged 0 to 36 months. To decide on the best possible combination,  
16 researchers considered both “one item delay” and “two items delay” as screen positive. When  
17 one item delay considered as screen positive, sensitivity and specificity of LEST (0-3) found  
18 to be 95.8% and 77.5% respectively. Similarly, when two items delay measured as screen  
19 positive, the sensitivity and specificity obtained as 66.7% and 94.8% respectively.[47] It  
20 should be noted that the original version of Receptive-Expressive Emergent Language Scale  
21 (1971) was used in this study for validation due to the lack of age-appropriate language  
22 assessment tool for language delay.  
23  
24  
25  
26  
27  
28  
29  
30  
31  
32  
33  
34  
35  
36  
37  
38

#### 39 Little Developmental Coordination Disorder Questionnaire (Little DCDQ)

40  
41 The Little DCDQ was developed by Rithman and colleagues in Canada to assess gross motor  
42 and fine motor function of children between 3 to 5 years of age. It is a parent-reported  
43 questionnaire with 15 items under three main components, control during execution, fine  
44 motor execution and overall coordination.[38] The Little DCDQ was validated against the  
45 Movement Assessment Battery for Children-2 as a reference standard in a group of 53 South  
46 African pre-schoolers between 3 to 5 years of age, with Afrikaans, Tswana or English  
47 speaking parents.[38] With 57.14% sensitivity and 81.25% specificity, Little DCDQ had the  
48 potential to be used in South African culture, however, some adjustments would be required.  
49  
50  
51  
52  
53  
54  
55  
56  
57  
58  
59  
60

### Lucknow Development Screen (LDS)

The LDS was developed in CSM Medical University, Lucknow, India, using selected milestones from Baroda Development Screening Test. It is a 27 items chart format tool, covering four domains namely motor, mental, language and social. Suitable for children aged 0 to 24 months. The LDS is said to be easily administrable by interviewing parents or caregiver.[36] In a study conducted in India, the LDS tool was validated against the DASII and the Vineland Social Maturity Scale. They administered the tool to mothers of a sample of 142 children, aged between 6 to 24 months, attending Paediatric Outpatients or Neurology Clinic of CSM Medical University, Lucknow, India. The screening tool was translated into Hindi for easy understanding and administration. For 3 children among the sample size of 142, Vineland Social Maturity scale was used as a reference standard, as DASII couldn't be applied to them. It is claimed that the LDS has a great potential to be used as a community screening tool among Indian children, with an overall sensitivity of 95.9% and specificity 73.1%.[36]

### Mongolian Rapid Baby Scale (MORBAS)

The MORBAS is a written developmental screening test, designed and developed in Mongolia. It has 161 items arranged under seven developmental domains, namely gross motor, fine motor, cognitive, expressive language, receptive language, social-emotional and adaptive behaviour. The tool is suitable for children aged 0 to 42 months.[41] In a study conducted in Mongolia, MORBAS was administered in a convenience sample of 150 Mongolian children aged 0 to 42 months and thus validated against the Bayley Scales of Infant and Toddler Development-III. With sensitivity 81.8% and specificity 52.3%,[41] MORBAS could be useful in the long run to screen out children for early intervention and rehabilitation.

### New Delhi – Development Screening Questionnaire (ND-DSQ)

The ND-DSQ was developed by Jain and colleagues, at Chacha Nehru Bal Chikitsalaya, a tertiary hospital of northern India. ND-DSQ has 20 items, two age sets (9 months and 18 months) and applicable for children aged 9 to 18 months.[42] The items mentioned were milestone specific. Thus, no explicit mention of the developmental domains was found. In the study by Jain et al., 2017; ND-DSQ was validated against DASII in a convenience sample of 200 children aged 9 and 18 months (with 100 children per age group). It was established that the 9-month questionnaire was 100% sensitive and 87.2% specific for Indian children. Correspondingly, the 18 months questionnaire was validated with 91.4% sensitivity and 88.7% specificity.[42] As a newly developed tool, the ND-DSQ is promising to be useful for Indian and similar cultural settings.

### Parent Evaluation of Developmental Status (PEDS)

This tool was developed in 1997 by F. P. Glascoe at Tennessee, USA.<sup>51</sup> It is the only screening tool available to date that addresses parent's concern about children's development in the following domains: gross motor, fine motor, cognitive, expressive language, receptive language, behaviour, social-emotional, self-help, school and other.[52] It has ten open-ended questions under ten areas of parental concerns, applicable for children aged 0 to 8 years. The other category allows parents to express concerns not already addressed under previous categories. This unique property makes PEDS unique as a developmental screening tool. In PEDS, parental concerns are labelled as "predictive" (significant) and "non-predictive" (non-significant). Thus, children are screened as low risk, moderate risk and high-risk group if they have no or non-predictive concerns, one predictive concern and two predictive concerns, respectively.[40]

1  
2  
3 In the study by Chunusuwan et al., 2016; the PEDS- Thai was validated against the  
4 “Parent Evaluation of Developmental Status: Developmental Milestones, Assessment Level”  
5  
6 in a tertiary hospital. A convenience sample of 266 children of 9, 18 and 30 months of age  
7  
8 was selected. Screen positive children were assembled as “high risk” ( $\geq 2$  significant  
9  
10 concerns) and “moderate or high risk” ( $\geq 1$  significant concern) group. Sensitivity and  
11  
12 specificity of PEDS against Parent Evaluation of Developmental Status: Developmental  
13  
14 Milestones, Assessment Level for the high-risk group was established as 27.7% and 93.0%,  
15  
16 respectively. For moderate or high-risk group, the tool was 67.7% sensitive and 60.7%  
17  
18 specific.[40] In order to avoid unnecessary/over-referral, the authors suggested to practice  
19  
20 second stage evaluation (using Parent Evaluation of Developmental Status: Developmental  
21  
22 Milestones, ASQ, Denver-II etc. tools) alongside/after PEDS screening.  
23  
24  
25  
26  
27  
28  
29

30 In another study by Wantanakorn et al., 2016; they validated the PEDS- Thai against  
31  
32 the Mullen Scales of Early Learning tool as a reference standard in a convenience sample of  
33  
34 137 children aged 18 to 36 months in another tertiary hospital. It was found that the PEDS-  
35  
36 Thai is a promising tool for Thai cultural backgrounds with overall sensitivity of 92.8% and  
37  
38 specificity 49.2%.[39] According to the authors, “the relatively low specificity of PEDS seen  
39  
40 here may be because of the excessive concern of parents regarding their child’s development,  
41  
42 especially who are in relatively high socioeconomic status”. The selection bias of participants  
43  
44 was mentioned as the major limitation of the study. Thus, they advised further evaluation of  
45  
46 the diagnostic performances of the tool using a representative sample of the population.  
47  
48  
49  
50

### 51 Rapid Pre-screening Denver Questionnaire (R-PDQ)

52  
53 The R-PDQ is a general developmental screening tool covering four developmental domains:  
54  
55 gross motor, fine motor activity, personal-social and language.[35] It has four age sets  
56  
57 applicable for children aged 0 to 6 years: 0 to 9 months, 9 to 24 months, 2 to 4 years and 4 to  
58  
59  
60

1  
2  
3 6 years. Each questionnaire contained 25 items. To score a child, the responding person had  
4 to keep answering the questions until there were three negative responses under a specific  
5 domain. In the study by Awasthi et al., 1997; the 2 to 4 years questionnaire of R-PDQ was  
6 validated against the Denver Developmental Screening Test. The study participants were  
7 randomly selected 126 children living in urban slums of Lucknow, India. To validate the tool,  
8 when a delay in more than one domain was considered as the cut-off, the tool was revealed to  
9 be 100% sensitive and 7.8% specific. Similarly, when a delay in more than two domains was  
10 considered as the cut-off, the sensitivity and specificity were found to be 18.2% and 42.6%,  
11 respectively.[35] Inconvenient validity and high referral rate compared to US children were  
12 explained by the presence of various “difficult to interpret” questions and Denver  
13 Developmental Screening Test being an unsuitable reference standard for R-PDQ.  
14  
15  
16  
17  
18  
19  
20  
21  
22  
23  
24  
25  
26  
27  
28  
29

#### 30 Road to Health Booklet Developmental Checklist (RTHB-DC)

31 The RTHB-DC was prepared as an integrated part of The Road to Health Booklet, the revised  
32 version of which was introduced in October 2010. RTHB-DC is the only developmental  
33 surveillance and screening tool, currently implemented nationally in South Africa. The tool  
34 consists of 21 questions covering gross motor, fine motor, communication, vision, and  
35 hearing domains. The checklist is applicable for children aged 14 weeks to 6 years.[53] In the  
36 study by Linde et al., 2015; RTHB-DC was validated against PEDS and Parent Evaluation of  
37 Developmental Status: Developmental Milestones tools. The sample size was 201, consisting  
38 of children aged 6 to 12 months old. In a primary health care clinic setting in South Africa,  
39 the sensitivity of the tool was found to be very low, i.e. 25% compared to reasonably high  
40 specificity of 91%.[46] Further development of the tool has been suggested by the authors  
41 incorporating consistent age gaps and inclusion of all developmental domains.  
42  
43  
44  
45  
46  
47  
48  
49  
50  
51  
52  
53  
54  
55  
56  
57

#### 58 Ten Questions (TQ)

1  
2  
3 The TQ Screening Instrument was developed in 1984 as part of a pilot study conducted by  
4 the University of Columbia, USA, for use in resource-poor countries.[54, 55] TQ is a parent  
5 reported tool comprising of ten questions addressing motor, cognitive, vision, hearing, and  
6 seizure status. A child is considered screen positive if any of the questions are found to be  
7 positive. The tool is appropriate for children aged 2 to 9 years. In a study by Koura et al.,  
8 2013; the TQ was validated against the Mullen Scales of Early Learning in a sample of 357  
9 children aged 12 months.[45] The participants were the offspring of the mothers who were  
10 enrolled in the “Malaria in Pregnancy Preventive Alternative Drugs” trial. To adjust the tool  
11 for that age group, researchers had excluded the language domain which is applicable for  
12 children above 2 years. In that study, screening was done in the community followed by a  
13 detailed assessment done in the health centre. It was found that the overall tool had  
14 reasonably high sensitivity (81%) but poor specificity (31%) for children of Benin. This is  
15 compared to the 76.5% sensitivity and 75.7% specificity where only the motor domain was  
16 considered.[45] Mullen Scales of Early Learning was used due to lack of a reference standard  
17 assessment tool for the Beninese population. The result suggests that the TQ tool might be  
18 useful for resource-poor settings to screen out moderate to severe delay in motor function.

19  
20  
21  
22  
23  
24  
25  
26  
27  
28  
29  
30  
31  
32  
33  
34  
35  
36  
37  
38  
39  
40  
41 The major findings of this systematic review are presented in Table 3.  
42  
43  
44  
45  
46  
47  
48  
49  
50  
51  
52  
53  
54  
55  
56  
57  
58  
59  
60



Table 3: Major findings from the selected studies used in this review

| General Screening Tools                  |                                      |                                                          |                                                                                                                             |                                                                                                           |                                                                                |                                                 |                                                                                    |
|------------------------------------------|--------------------------------------|----------------------------------------------------------|-----------------------------------------------------------------------------------------------------------------------------|-----------------------------------------------------------------------------------------------------------|--------------------------------------------------------------------------------|-------------------------------------------------|------------------------------------------------------------------------------------|
| Ref.                                     | Country                              | Screening Tool                                           | Reference Standard                                                                                                          | Study                                                                                                     | Participants                                                                   | Key Findings                                    |                                                                                    |
| <i>Suitable for non-medical settings</i> |                                      |                                                          |                                                                                                                             |                                                                                                           |                                                                                |                                                 |                                                                                    |
| [35]                                     | India<br>Lower-Middle- Income        | Revised Prescreening Denver Questionnaire (R-PDQ)        | Denver Developmental Screening Test                                                                                         | <b>Design</b> Cross-Sectional<br><br><b>Setting</b> Community                                             | <b>Sample</b> - 126<br><br>Age – 2-4 years<br><br><b>Cluster random sample</b> | Delay in ≥ 1 domain<br><br>Delay in ≥ 2 domains | Sensitivity 100%<br>Specificity 7.8%<br><br>Sensitivity 18.2%<br>Specificity 42.6% |
| [44]                                     | Bangladesh<br>Lower-Middle- Income   | Development Screening Questionnaire (DSQ)                | Rapid Neurodevelopmental Assessment                                                                                         | <b>Design</b> Cross-Sectional<br><br><b>Setting</b> Screening- Household<br><br>Assessment- Hospital      | <b>Sample</b> – 197<br><br>Age - 0-2 years<br><br><b>Random sample</b>         | Overall                                         | Sensitivity 47.1%<br>Specificity 97.2%                                             |
| [45]                                     | Benin<br>Low-Income                  | Ten Questions (TQ)                                       | Mullen Scales of Early Learning                                                                                             | <b>Design</b> Cross-Sectional<br><br><b>Setting</b> Screening- Household<br><br>Assessment- Health Centre | <b>Sample</b> - 357<br><br>Age – 12 months<br><br><b>Random sample</b>         | Motor<br><br>Overall                            | Sensitivity 76.5%<br>Specificity 75.7%<br><br>Sensitivity 81%<br>Specificity 31%   |
| <i>Suitable for primary care</i>         |                                      |                                                          |                                                                                                                             |                                                                                                           |                                                                                |                                                 |                                                                                    |
| [46]                                     | South Africa<br>Upper-Middle- Income | Road to Health Booklet Developmental Checklist (RTHB-DC) | Parent Evaluation of Developmental Status (PEDS)<br><br>Parent Evaluation of Developmental Status: Developmental Milestones | <b>Design</b> Comparative Cross-sectional within-subject<br><br><b>Setting</b> PHC clinics                | <b>Sample</b> - 201<br><br>Age – 6-12 months<br><br><b>Convenience sample</b>  | Overall                                         | Sensitivity 25%<br>Specificity 91%                                                 |
| <i>Suitable for a tertiary hospital</i>  |                                      |                                                          |                                                                                                                             |                                                                                                           |                                                                                |                                                 |                                                                                    |
| [36]                                     | India<br>Lower-Middle- Income        | Lucknow Development Screen (LDS)                         | Developmental Assessment Scales for Indian Infants (DASII)<br><br>Vineland Social Maturity Scale                            | <b>Design</b> Cross-Sectional<br><br><b>Setting</b> Hospital                                              | <b>Sample</b> - 142<br><br>Age - 6-24 months<br><br><b>Convenience sample</b>  | Overall                                         | Sensitivity 95.9%<br>Specificity 73.1%                                             |
| [39]                                     | Thailand<br>Upper-Middle- Income     | Parent Evaluation of Developmental Status (PEDS- Thai)   | Mullen Scales of Early Learning                                                                                             | <b>Design</b> Cross-Sectional<br><br><b>Setting</b> Hospital                                              | <b>Sample</b> - 137<br><br>Age – 18-30 months<br><br><b>Convenience sample</b> | Overall                                         | Sensitivity 92.8%<br>Specificity 49.2%                                             |
| [40]                                     | Thailand<br>Upper-Middle- Income     | Parent Evaluation of Developmental Status (PEDS)         | Parent Evaluation of Developmental Status: Developmental Milestones, Assessment Level                                       | <b>Design</b> Cross-Sectional<br><br><b>Setting</b> Hospital                                              | <b>Sample</b> - 266<br><br>Age – 9, 18 and 30 months                           | ≥ 1 significant concern<br><br>≥ 2 significant  | Sensitivity 67.7%<br>Specificity 60.7%<br><br>Sensitivity 27.7%                    |

|                                          |                                             |                                                                        |                                                            |                                                                     |                                                                                                      |                                  |                                                                                  |
|------------------------------------------|---------------------------------------------|------------------------------------------------------------------------|------------------------------------------------------------|---------------------------------------------------------------------|------------------------------------------------------------------------------------------------------|----------------------------------|----------------------------------------------------------------------------------|
|                                          |                                             |                                                                        |                                                            |                                                                     | <b>Convenience sample</b>                                                                            | concerns                         | Specificity 93.0%                                                                |
| [41]                                     | <b>Mongolia</b><br>Lower-Middle- Income     | Mongolian Rapid Baby Scale (MORBAS)                                    | Bayley Scales of Infant and Toddler Development-III        | <b>Design</b> Cross-Sectional<br><b>Setting</b> Hospital            | <b>Sample</b> - 150<br><b>Age</b> – 0 month 16 days – 42 months 15 days<br><b>Convenience sample</b> | Overall                          | Sensitivity 81.8%<br>Specificity 52.3%                                           |
| [42]                                     | <b>India</b><br>Lower-Middle- Income        | New Delhi – Development Screening Questionnaire (ND-DSQ)               | Developmental Assessment Scales for Indian Infants (DASII) | <b>Design</b> Cross-Sectional<br><b>Setting</b> Hospital            | <b>Sample</b> - 200<br><b>Age</b> – 9 and 18 months<br><b>Convenience sample</b>                     | 9-months<br>18-months            | Sensitivity 100%<br>Specificity 87.2%<br>Sensitivity 91.4%<br>Specificity 88.7%  |
| [43]                                     | <b>India</b><br>Lower-Middle- Income        | Ages and Stages Questionnaire (ASQ-II)                                 | Developmental Assessment Scales for Indian Infants (DASII) | <b>Design</b> Cross-Sectional<br><b>Setting</b> Hospital            | <b>Sample</b> - 200<br><b>Age</b> – 4, 10, 18 and 24 months<br><b>Convenience sample</b>             | Overall                          | Sensitivity 83.3%<br>Specificity 75.4%                                           |
| <b>Motor Screening Tools</b>             |                                             |                                                                        |                                                            |                                                                     |                                                                                                      |                                  |                                                                                  |
| <b>Ref.</b>                              | <b>Country</b>                              | <b>Screening Tool</b>                                                  | <b>Reference Standard</b>                                  | <b>Study</b>                                                        | <b>Participants</b>                                                                                  | <b>Key Findings</b>              |                                                                                  |
| <i>Suitable for non-medical settings</i> |                                             |                                                                        |                                                            |                                                                     |                                                                                                      |                                  |                                                                                  |
| [38]                                     | <b>South Africa</b><br>Upper-Middle- Income | Little Developmental Coordination Disorder Questionnaire (Little DCDQ) | Movement Assessment Battery for Children -2                | <b>Design</b> – Cross-sectional<br><b>Setting</b> – nursery schools | <b>Sample</b> – 53<br><b>Age</b> – 3-5 years<br><b>Convenience sample</b>                            | Overall                          | Sensitivity 57.14%<br>Specificity 81.25%                                         |
| <i>Suitable for tertiary hospital</i>    |                                             |                                                                        |                                                            |                                                                     |                                                                                                      |                                  |                                                                                  |
| [37]                                     | <b>Iran</b><br>Upper-Middle- Income         | Infant Neurological International Battery (INFANIB)                    | Developmental Assessment by Pediatric Neurologist          | <b>Design</b> – Cross-Sectional<br><b>Setting</b> Hospital          | <b>Sample</b> – 153<br><b>Age</b> – 4-18 months<br><b>Random sample</b>                              | Overall                          | Sensitivity 90%<br>Specificity 83%                                               |
| <b>Language Screening Tool</b>           |                                             |                                                                        |                                                            |                                                                     |                                                                                                      |                                  |                                                                                  |
| <b>Ref.</b>                              | <b>Country</b>                              | <b>Screening Tool</b>                                                  | <b>Reference Standard</b>                                  | <b>Study</b>                                                        | <b>Participants</b>                                                                                  | <b>Key Findings</b>              |                                                                                  |
| <i>Suitable for non-medical settings</i> |                                             |                                                                        |                                                            |                                                                     |                                                                                                      |                                  |                                                                                  |
| [47]                                     | <b>India</b><br>Lower-Middle- Income        | Language Evaluation Scale Trivandrum for 0-3 years (LEST 0-3)          | Receptive Expressive Emergent Language Scale               | <b>Design</b> Cross-Sectional<br><b>Setting</b> - Community         | <b>Sample</b> – 643<br><b>Age</b> – 0-3 years<br><b>Cluster random sample</b>                        | One item delay<br>Two item delay | Sensitivity 95.8%<br>Specificity 77.5%<br>Sensitivity 66.7%<br>Specificity 94.8% |

## DISCUSSION

To the best of our knowledge, this is the first systematic review which attempts to find the available screening tools for early identification of children with developmental delay in LMICs. Although some systematic reviews were found who considered developmental assessment tools requiring professional experts with a special office setup,[56] screening neurodevelopmental disability irrespective of age limit and diagnosis (e.g. developmental delay, global developmental delay, cerebral palsy, autism spectrum disorder, attention deficit hyperactivity disorder, epilepsy, etc.),[57] or reflected high-income country context.[8] We have also observed a study in which both screening and assessment tools have been systematically rated for accuracy and feasibility to use in LMICs.[58] Where, information was significantly dependent to World Bank's toolkit and inventory on early child development tools,[59] rather than being obtained from systematic search through databases. In contrast, the purpose of this review was to systematically look for the available studies where screening tools were used exclusively for early identification (limited to children under 5 years of age) of developmental delay in the LMICs region where all types of study settings (i.e. from household to health facilities) were addressed in order to go for early intervention and rehabilitation of the screened cases. Therefore, the unique contribution of this review is to be able to report those screening tools exclusively designed for screening of developmental delay at the earliest possible time in both single and multiple domains. The review also provides a comparative analysis of available studies reporting the eligible tools.

### Research gaps and future directions

Several research gaps have been identified in the reported studies. Primarily, there was a lack of standard terminologies to indicate the developmental domains. The examples of synonymous domain names are as follows: (i) **cognitive**: cognition, cognitive, global, mental,

1  
2  
3 problem solving, etc.;[36, 39-41, 43-45] (ii) **language**: communication, expressive  
4 communication, expressive language, language, receptive communication, receptive  
5 language, speech, speech and language, etc.;[35, 36, 39-41, 43, 44, 46, 47] (iii) **psycho-**  
6  
7  
8 **social**: adaptive behaviour, behaviour, personal-social, self-help, social, social-emotional,  
9 socialization, etc.[35, 36, 39-41, 43, 44] Apart from those, few researchers incorporated  
10 unconventional developmental domains in their tools, such as: hearing, school, seizure,  
11 vision, etc.[39, 40, 45, 46] Secondly, there was a lack of standard proxy measures to define  
12 the screen-positive cases. Common examples are as follows: overall scores,[43] number of  
13 items,[47] number of functional domains,[35] number of significant concerns[40] etc. These  
14 two factors together, often make the screening results incomprehensible to health  
15 professionals who are not familiar with the tool in question. Moreover, it is neither possible  
16 to convert nor compare the test scores between separate screening tools, for better  
17 understanding. Many of the tools developed in English speaking countries might not be  
18 suitable for non-English speaking countries due to different socio-cultural backgrounds and  
19 problematic translation.[60-62] These issues might become a barrier for early identification  
20 and rehabilitation of developmental delay from the service providers' end. Lastly, several  
21 studies reported that the expected sensitivity-specificity was not achieved due to the lack of  
22 validated reference standard assessment tool for the particular culture in question.[35, 45, 47]  
23 To the best of our knowledge, there is a lack of WHO's centralized initiatives, as well as no  
24 Global regulatory body is currently working in this regard.

25  
26  
27  
28  
29  
30  
31  
32  
33  
34  
35  
36  
37  
38  
39  
40  
41  
42  
43  
44  
45  
46  
47  
48  
49 In this systematic review, we observed both Asian and African cultural contexts  
50 among the eligible studies. Although, the number of countries engaged in similar studies are  
51 alarmingly low compared to the number of LMICs, in total.[31] This reveals the urgent need  
52 for valid and culturally sensitive screening tools for the rest of the LMICs. Among the twelve  
53 eligible screening tools, half of them were developed in LMICs (DSQ, LEST 0-3, LDS,  
54  
55  
56  
57  
58  
59  
60

MORBAS, ND-DSQ and RTHB-DC) and another half were developed in high-income countries (ASQ, INFANIB, Little DCDQ, PEDS, R-PDQ and TQ). We have found the majority of the culturally sensitive tools translated in their native language. Still, for multilingual countries like Benin, Ethiopia, India, etc. the necessity of translating the tools in regional languages remains high. None of the LMICs has been found to be engaged in collecting nationally representative longitudinal data on the prevalence of developmental delay, which is vital for disease projection. The gathering of nationally representative prevalence data in linguistic, social, ethnic and cultural subgroups would allow the validation of customized developmental screening tools according to disease burden. Greater customization to respect the diverse cultural norms[63] of a particular community, will also most likely result in greater acceptance[64, 65] of the screening process, which is crucial for the success of a large-scale surveillance program.

### **Limitations**

Despite our best efforts, there were several limitations to this study. This study was limited to articles published in the English language only due to constraints in resources and time. In this study, we could neither address developmentally delayed children due to HIV exposure nor due to autism spectrum disorder or other behavioural disorders. Though these two groups of children also suffer from varying degree of developmental delay, the pathogenesis behind those delays is closely related to the diseases themselves.[66, 67] Moreover, conventionally it takes more than two years of age to diagnose a child with autism spectrum disorder and hence the age range of currently available autism screening tools start later than general developmental screening tools (e.g. Modified Checklist for Autism in Toddlers: 16-30 months; where ASQ-3: 1-66 months). This conflicts with the objectives of our study to ensure early diagnosis of developmental delay. So, with respect to other neurodevelopmental

1  
2  
3 disorders, we preferred to focus exclusively on developmental delay in our study. Moreover,  
4 we were unable to critically appraise the available screening tools in terms of diagnostic  
5 accuracy due to the unavailability of the necessary information. Which is quite reasonable as  
6 Boggs and her colleagues also reported that authors tend to provide validity information very  
7 briefly and evidence on accuracy are most difficult to obtain.[58] We are hopeful to conduct  
8 subsequent systematic review and meta-analysis on geographical region/ country/ domain  
9 specific screening tools and their psychometric properties based on the information obtained  
10 from this study.  
11  
12  
13  
14  
15  
16  
17  
18  
19  
20  
21  
22  
23

## 24 **Recommendations**

- 25  
26 (1) A global regulatory body should be formed to standardize the terminologies and cut-  
27 off scores of available and future screening tools to improve comprehensiveness and  
28 interpretation of test results, simultaneously ensuring better correlation between  
29 results obtained from different screening tools.  
30  
31  
32  
33  
34  
35
- 36 (2) Future research work should focus on revising existing screening tools in different  
37 ethnic and cultural perspectives and validate them in the respective normative sample  
38 as well as conducting systematic reviews based on individual screening tools in  
39 different cultural settings.  
40  
41  
42  
43  
44
- 45 (3) We also recommend ensuring nationwide routine developmental surveillance  
46 programs in LMICs using culturally sensitive tools to identify and treat  
47 developmental delay as early as possible. Developmental screening at the time of  
48 routine immunization schedule could be a possible way to integrate this with an  
49 existing successful public health program in LMICs. This timing would be both cost-  
50 effective and maximize response rates.  
51  
52  
53  
54  
55  
56  
57  
58  
59  
60

## CONCLUSION

Developmental screening is required for early diagnosis of developmental delays in infants and young children in LMICs to enable early intervention and rehabilitation. In order to do this, culturally-sensitive, easy to administer screening tools with good psychometric properties are needed. We observed that there is a lack of culturally sensitive developmental screening tools validated among under 5 children in LMICs. However, we have found five screening tools with relatively high sensitivity and specificity. We also identified key research gaps and consequently proposed a few recommendations for overcoming those gaps. These include (but not limited to) global standardization of terminologies and cut-off scores for screening tools, revising existing tools according to diverse cultural norms and validating them in the respective normative sample and finally ensuring nationwide routine developmental surveillance programs in LMICs using culturally sensitive tools. Therefore, future research should focus on enabling the caregivers, health workers, and therapists to assist in children with developmental delays in LMICs to reach their full developmental potential.

### Declaration of interest

This manuscript is new and entirely original, has not been copyrighted, published, submitted, or accepted for publication elsewhere. All authors have given their consent and agreed to submit to your journal. The authors have no conflict of interest.

**Acknowledgments:** The authors acknowledge the wise feedback and invaluable suggestions received from Prof. Dr. M. Shafiqur Rahman, Institute of Statistical Research and Training, University of Dhaka and Prof. Dr. Naila Zaman Khan, Department of Paediatric Neuroscience, Dhaka Shishu (Children's) Hospital, Bangladesh Institute of Child Health.

1  
2  
3 **Author Statement:** This study was conceived and designed by GK and TF. CK developed  
4 the search strategy and performed the literature search. TF and GK performed full-text  
5 reviews and extraction of data. TF and MKI wrote the first draft with input from GK and KB.  
6  
7 All authors reviewed all drafts and approved the final submitted manuscript.  
8  
9

10  
11  
12 **Funding:** This project was not externally funded. Study activities were supported by the  
13 Asian Institute of Disability and Development (AIDD), University of South Asia,  
14 Bangladesh.  
15  
16

17  
18  
19 **Competing interests:** The authors have no conflict of interest.  
20

21  
22 **Patient consent for publication:** Not required.  
23

24  
25 **Ethics approval:** As this systematic review did not directly involve human or animal  
26 subjects, or access to medical records; ethical approval was not required.  
27

28  
29 **Provenance and peer review:** Not commissioned; externally peer reviewed.  
30

31  
32 **Data sharing statement:** No original data were generated for this study.  
33

34  
35 **Open access:** This is an open access article distributed in accordance with the Creative  
36 Commons Attribution Non Commercial (CC BY-NC 4.0) license, which permits others to  
37 distribute, remix, adapt, build upon this work non-commercially, and license their derivative  
38 works on different terms, provided the original work is properly cited, appropriate credit is  
39 given, any changes made indicated, and the use is non-commercial. See: [http://](http://creativecommons.org/licenses/by-nc/4.0/)  
40 [creativecommons.org/licenses/by-nc/4.0/](http://creativecommons.org/licenses/by-nc/4.0/).  
41  
42  
43  
44  
45  
46  
47  
48

## 49 REFERENCES

- 50  
51  
52 1. Developmental delay [Internet]. Med.umich.edu. 2010 [cited 5 July 2018]. Available from:  
53 <http://www.med.umich.edu/yourchild/topics/devdel.htm>.  
54 2. International classification of functioning, disability and health. Geneva: World Health Organization;  
55 2001.  
56 3. Fernald L, Kariger P, Engle P, et al. Examining early child development in low-income countries: a  
57 toolkit for the assessment of children in the first five years of life [Internet]. The World Bank; 2009  
58 [cited 1 January 2019]. Available from:  
59 <https://openknowledge.worldbank.org/bitstream/handle/10986/28107/NonAsciiFileName0.pdf?sequence=1>.  
60



4. Walker S, Wachs T, Meeks Gardner J, et al. Child development: risk factors for adverse outcomes in developing countries. *The Lancet* 2007;369:145-157.
5. Early childhood development and disability: a discussion paper [Internet]. Apps.who.int. 2012 [cited 13 February 2019]. Available from: [https://apps.who.int/iris/bitstream/handle/10665/75355/9789241504065\\_eng.pdf;sequence=1](https://apps.who.int/iris/bitstream/handle/10665/75355/9789241504065_eng.pdf;sequence=1).
6. What is a developmental delay? [Internet]. House with No Steps. 2018 [cited 15 May 2019]. Available from: <https://www.hwns.com.au/disability-services/childrens-services/early-childhood-intervention/what-is-a-developmental-delay-or-disability/>.
7. About developmental disabilities [Internet]. Institute of Community Integration, University of Minnesota. 2019 [cited 15 May 2019]. Available from: <https://ici.umn.edu/welcome/definition.html>.
8. Warren R, Kenny M, Bennett T, et al. Screening for developmental delay among children aged 1-4 years: a systematic review. *CMAJ Open* 2016;4:E20-E27.
9. Sices L. Developmental screening in primary care: the effectiveness of current practice and recommendations for improvement [Internet]. 2007 [cited 15 May 2018]. Available from: <https://core.ac.uk/download/pdf/71350769.pdf>.
10. Newborn death and illness [Internet]. WHO. 2011 [cited 5 July 2018]. Available from: [https://www.who.int/pmnch/media/press\\_materials/fs/fs\\_newborndeath\\_illness/en](https://www.who.int/pmnch/media/press_materials/fs/fs_newborndeath_illness/en).
11. Neonatal mortality - UNICEF Data [Internet]. UNICEF Data. 2018 [cited 10 July 2018]. Available from: <https://data.unicef.org/topic/child-survival/neonatal-mortality/>.
12. Mathers C, Loncar D. Projections of global mortality and burden of disease from 2002 to 2030. *PLoS Medicine* 2006;3:e442.
13. Grantham-McGregor S, Cheung Y, Cueto S, et al. Developmental potential in the first 5 years for children in developing countries. *The Lancet* 2007;369:60-70.
14. Hasan A, Leslie R, Nakajima N. How community-based early childhood programs can impact child development [Internet]. World Bank Blogs. 2017 [cited 10 July 2018]. Available from: <http://blogs.worldbank.org/education/how-community-based-early-childhood-programs-can-impact-child-development>.
15. Ofek-Shlomai N, Berger I. Inflammatory injury to the neonatal brain- what can we do?. *Front Pediatr* 2014;2.
16. Lin C, Muo C, Chang Y, et al. Change in prevalence status for children with developmental delay in Taiwan: a nationwide population-based retrospective study. *Neuropsychiatr Dis Treat* 2015;11:1541-1547.
17. Wang S, Hsu S, Chen L. The impact on neonatal mortality of shifting childbirth services among levels of hospitals: Taiwan's experience. *BMC Health Serv Res* 2009;9:94.
18. Scherzer A. Experience in cambodia with the use of a culturally relevant developmental milestone chart for children in low- and middle-income countries. *J Policy Pract Intellect Disabil* 2009;6:287-292.
19. Soltani S, Takian A, Sari A, et al. Cultural barriers in access to healthcare services for people with disability in Iran: A qualitative study. *Medical Journal of the Islamic Republic of Iran* 2017;31:293-299.
20. Baker D, Miller E, Dang M, et al. Developing culturally responsive approaches with southeast asian american families experiencing developmental disabilities. *Pediatrics* 2010;126:S146-S150.
21. Baxter C, Mahoney W. Developmental Disability Across Cultures [Internet]. Caring for kids new to canada. 2018 [cited 15 May 2019]. Available from: <https://www.kidsnewtocanada.ca/mental-health/developmental-disability/>.
22. Fischer V, Servili C, Morris J, et al. Developmental screening tools: feasibility of use at primary health level in low and middle-income settings. *Neuropsychiatr Enfance Adolesc* 2012;60:S304.
23. Gladstone M, Lancaster G, Jones A, et al. Can western developmental screening tools be modified for use in a rural Malawian setting?. *Arch Dis Child* 2008;93:23-29.
24. Sabanathan S, Wills B, Gladstone M. Child development assessment tools in low-income and middle-income countries: how can we use them more appropriately?. *Arch Dis Child* 2015;100:482-488.

25. Scherzer A, Chhagan M, Kauchali S, et al. Global perspective on early diagnosis and intervention for children with developmental delays and disabilities. *Dev Med Child Neurol* 2012;54:1079-1084.
26. Glascoe F, Cairney J. Best practices in test construction for developmental-behavioral measures: quality standards for reviewers and researchers. *Follow-Up for NICU Graduates*. Springer; 2018. p. 255-279.
27. Johnson-Gerard M. Early childhood development assessment tools [Internet]. Healthfully. 2017 [cited 5 July 2018]. Available from: <https://healthfully.com/223799-early-childhood-development-assessment-tools.html>.
28. Glascoe F, Dworkin P. The role of parents in the detection of developmental and behavioral problems. *Pediatrics* 1995;95:829-36.
29. First L, Palfrey J. The infant or young child with developmental delay. *N Engl J Med* 1994;330:478-483.
30. New country classifications by income level: 2018-2019 [Internet]. World Bank Blogs. 2018 [cited 26 July 2018]. Available from: <https://blogs.worldbank.org/opendata/new-country-classifications-income-level-2018-2019>.
31. World bank country and lending groups – world bank data help desk [Internet]. World Bank. 2018 [cited 26 July 2018]. Available from: <https://datahelpdesk.worldbank.org/knowledgebase/articles/906519>.
32. Moher D, Liberati A, Tetzlaff J, et al. Preferred reporting items for systematic reviews and meta-analyses: The PRISMA Statement. *Ann Intern Med* 2009;151:264-269.
33. Whiting P, Rutjes A, Westwood M, et al. QUADAS-2: a revised tool for the quality assessment of diagnostic accuracy studies. *Ann Intern Med* 2011;155:529-536.
34. Modesti P, Reboldi G, Cappuccio F, et al. Panethnic Differences in blood pressure in europe: a systematic review and meta-analysis. *PLoS One* 2016;11:e0147601.
35. Awasthi S, Pande V. Validation of revised prescreening denver questionnaire in preschool children of urban slums. *Indian Pediatr* 1997;34:919-922.
36. Bhave A, Bhargava R, Kumar R. Development and validation of a new Lucknow development screen for indian children aged 6 months to 2 years. *J Child Neurol* 2009;25:57-60.
37. Soleimani F, Dadkhah A. Validity and reliability of infant neurological international battery for detection of gross motor developmental delay in Iran. *Child Care Health Dev* 2007;33:262-265.
38. Venter A, Pienaar A, Coetzee D. Suitability of the 'Little DCDQ' for the identification of DCD in a selected group of 3–5-year-old South African children. *Early Child Dev Care* 2015;185:1359-1371.
39. Wantanakorn P, Sawangworachart K, Roongpraiwan R, et al. Parents' evaluation of developmental status (PEDS) in screening for developmental delay in Thai children aged 18-30 months. *Indian Pediatr* 2016;53:1110–1113.
40. Chunsuwan I, Hansakunachai T, Pornsamrit S. Parent evaluation of developmental status (PEDS) in screening: The Thai experience. *Pediatr Int* 2016;58:1277-1283.
41. Dagvadorj A, Takehara K, Bavuusuren B, et al. The quick and easy Mongolian rapid baby scale shows good concurrent validity and sensitivity. *Acta Paediatr* 2015;104:e94-e99.
42. Jain R, Arora A, Anand R, et al. Designing and validation of a Hindi-language parent self-report developmental screening tool. *Indian Pediatr* 2017;54:550-555.
43. Juneja M, Mohanty M, Jain R, et al. Ages and stages questionnaire as a screening tool for developmental delay in Indian children. *Indian Pediatr* 2011;49:457-461.
44. Khan N, Muslima H, Shilpi A, et al. Validation of a home-based neurodevelopmental screening tool for under 2-year-old children in Bangladesh. *Child Care Health Dev* 2012;39:643-650.
45. Koura K, Boivin M, Davidson L, et al. Usefulness of child development assessments for low-resource settings in francophone Africa. *J Dev Behav Pediatr* 2013;34:486-493.
46. Van der Linde J, Swanepoel D, Glascoe F, et al. Developmental screening in South Africa: comparing the national developmental checklist to a standardized tool. *Afr Health Sci* 2015;15:188-196.
47. Nair M, Harikumar Nair G, Mini A, et al. Development and validation of language evaluation scale trivandrum for children aged 0–3 years — LEST (0–3). *Indian Pediatr* 2013;50:463-467.

- 1
- 2
- 3
- 4 48. Singh A, Yeh C, Blanchard S. Ages and stages questionnaire: una escala de evaluación global. *Bol Med Hosp Infant Mex* 2017;74:5-12.
- 5
- 6 49. Squires J, Bricker D. ASQ®-3 - Brookes Publishing Co. [Internet]. Brookes Publishing Co. [cited 10 August 2018]. Available from: <https://brookespublishing.com/product/asq-3/>.
- 7
- 8 50. Liao W, Wen E, Li C, et al. Predicting neurodevelopmental outcomes for at-risk infants: reliability and predictive validity using a Chinese version of the INFANIB at 3, 7 and 10 months. *BMC Pediatr* 2012;12:27.
- 9
- 10
- 11 51. Glascoe FP. Parents' evaluation of developmental status (PEDS). *Indian Pediatr* 2003;40:439–40.
- 12 52. Woolfenden S, Eapen V, Williams K, et al. A systematic review of the prevalence of parental concerns measured by the Parents' Evaluation of Developmental Status (PEDS) indicating developmental risk. *BMC Pediatr* 2014;14:231.
- 13
- 14 53. Plessis L, Koornhof H, Marais M, et al. Implementation of the road-to-health-booklet health promotion messages at primary health care facilities, Western Cape Province, South Africa. *SAJCH* 2017;11:164-169.
- 15
- 16 54. Krishnamurthy V, Srinivasan R. Childhood disability screening tools : the south east Asian perspective a review for the who office of the south east Asian region. Mumbai. WHO; 2011.
- 17
- 18 55. Landers C, Kagitcibasi C. Measuring the psychosocial development of young children: the innocent technical workshop. Consultative Group on Early Childhood Care Development; 1990
- 19
- 20 56. Mukherjee S, Aneja S, Krishnamurthy V, et al. Incorporating developmental screening and surveillance of young children in office practice. *Indian Pediatr* 2014;51:627-635.
- 21
- 22 57. Maulik P, Darmstadt G. Childhood disability in low- and middle-income countries: overview of screening, prevention, services, legislation, and epidemiology. *Pediatrics* 2007;120:S1-S55.
- 23
- 24 58. Boggs D, Milner K, Chandna J, et al. Rating early child development outcome measurement tools for routine health programme use. *Arch Dis Child* 2019;104:S22-S33.
- 25
- 26 59. Fernald L, Prado E, Kariger P, et al. A toolkit for measuring early childhood development in low and middle-income countries. The World Bank; 2017.
- 27
- 28 60. Sarmiento Campos J, Squires J, Ponte J. Universal developmental screening: preliminary studies in Galicia, Spain. *Early Child Dev Care* 2010;181:475-485.
- 29
- 30 61. Pomés M, Squires J, Yovanoff P. Psychometric examination of a Spanish translation of a developmental screening instrument. *J Early Child Res* 2014;14:132-145.
- 31
- 32 62. Kiing J, Rajgor D, Toh T. Topical review: mind your language—translation matters (a narrative review of translation challenges). *J Pediatr Psychol* 2016;41:1110-1119.
- 33
- 34 63. Revel M. Article 12: Respect for cultural diversity and pluralism. In: ten Have H, Stanton-Jean M, ed. by. The UNESCO universal declaration on bioethics and human rights. UNESCO Publishing; 2019. p. 199-209.
- 35
- 36 64. Levine R, Levine S, Dixon S, et al. Child care and culture. Cambridge: Cambridge University Press; 1994.
- 37
- 38 65. Brooks E, Novins D, Noe T, et al. Reaching rural communities with culturally appropriate care: a model for adapting remote monitoring to American Indian veterans with posttraumatic stress disorder. *Telemed J E Health* 2013;19:272-277.
- 39
- 40 66. Lowry F. Brain chemistry differs in autism vs developmental delay [Internet]. Medscape. 2013 [cited 5 July 2018]. Available from: <https://www.medscape.com/viewarticle/808794>.
- 41
- 42 67. Ngoma MS M. The effect of HIV on developmental milestones in children. *J AIDS Clin Res* 2015;06:482.
- 43
- 44
- 45
- 46
- 47
- 48
- 49
- 50
- 51
- 52
- 53
- 54
- 55
- 56
- 57
- 58
- 59
- 60

1  
2  
3  
4  
5  
6  
7  
8  
9  
10  
11  
12  
13  
14  
15  
16  
17  
18  
19  
20  
21  
22  
23  
24  
25  
26  
27  
28  
29  
30  
31  
32  
33 **Figure 1:** Correlation between neonatal mortality rate and prevalence of developmental delay (Taiwan 1997-  
34 2008)  
35  
36  
37

38  
39  
40  
41  
42  
43  
44  
45  
46  
47  
48  
49  
50  
51  
52  
53  
54  
55  
56  
57  
58  
59  
60

Footnote: We have used prevalence of developmental delay among under 5 children (1997-2008) from a nation-wide population based retrospective study [16] and neonatal mortality rate (1998-2004) from another study [17]. It was revealed that the prevalence of developmental delay is positively associated with time and negatively associated with NMR. So, it can be said that, with time, while neonatal mortality rate is reducing, the prevalence of developmental delay is gradually increasing.

1  
2  
3  
4  
5  
6  
7  
8  
9  
10  
11  
12  
13  
14  
15  
16  
17  
18  
19  
20  
21  
22  
23  
24  
25  
26  
27  
28  
29  
30  
31  
32  
33  
34  
35  
36  
37  
38  
39  
40  
41  
42  
43  
44  
45  
46  
47  
48  
49  
50  
51  
52  
53  
54  
55  
56  
57  
58  
59  
60

For peer review only

**Figure 2:** PRISMA flow diagram

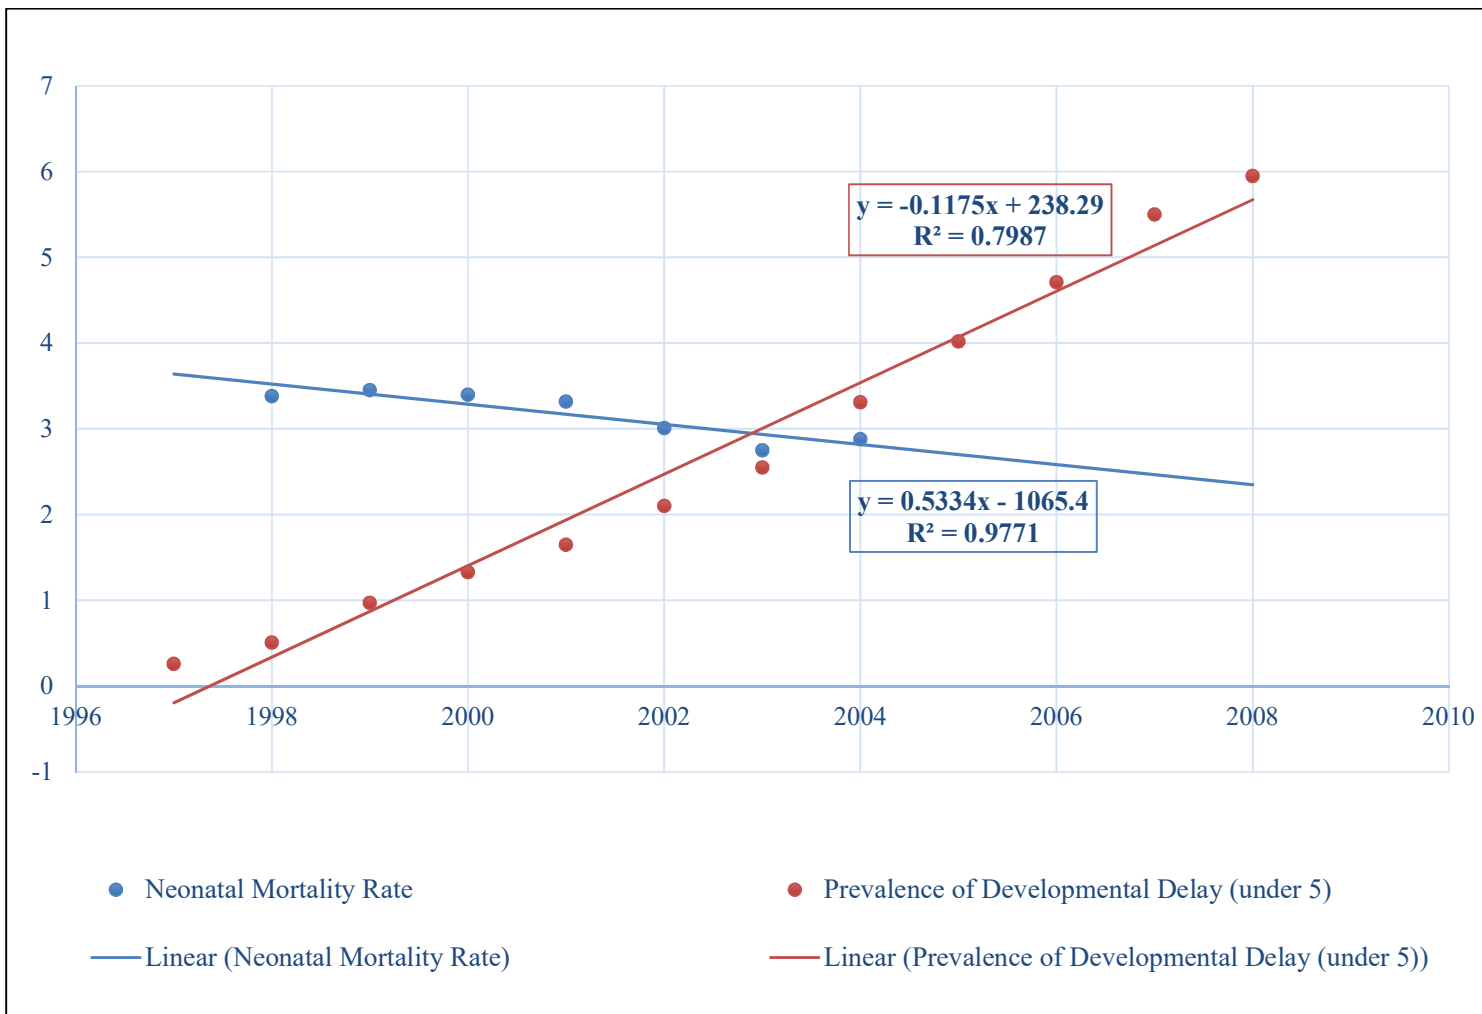

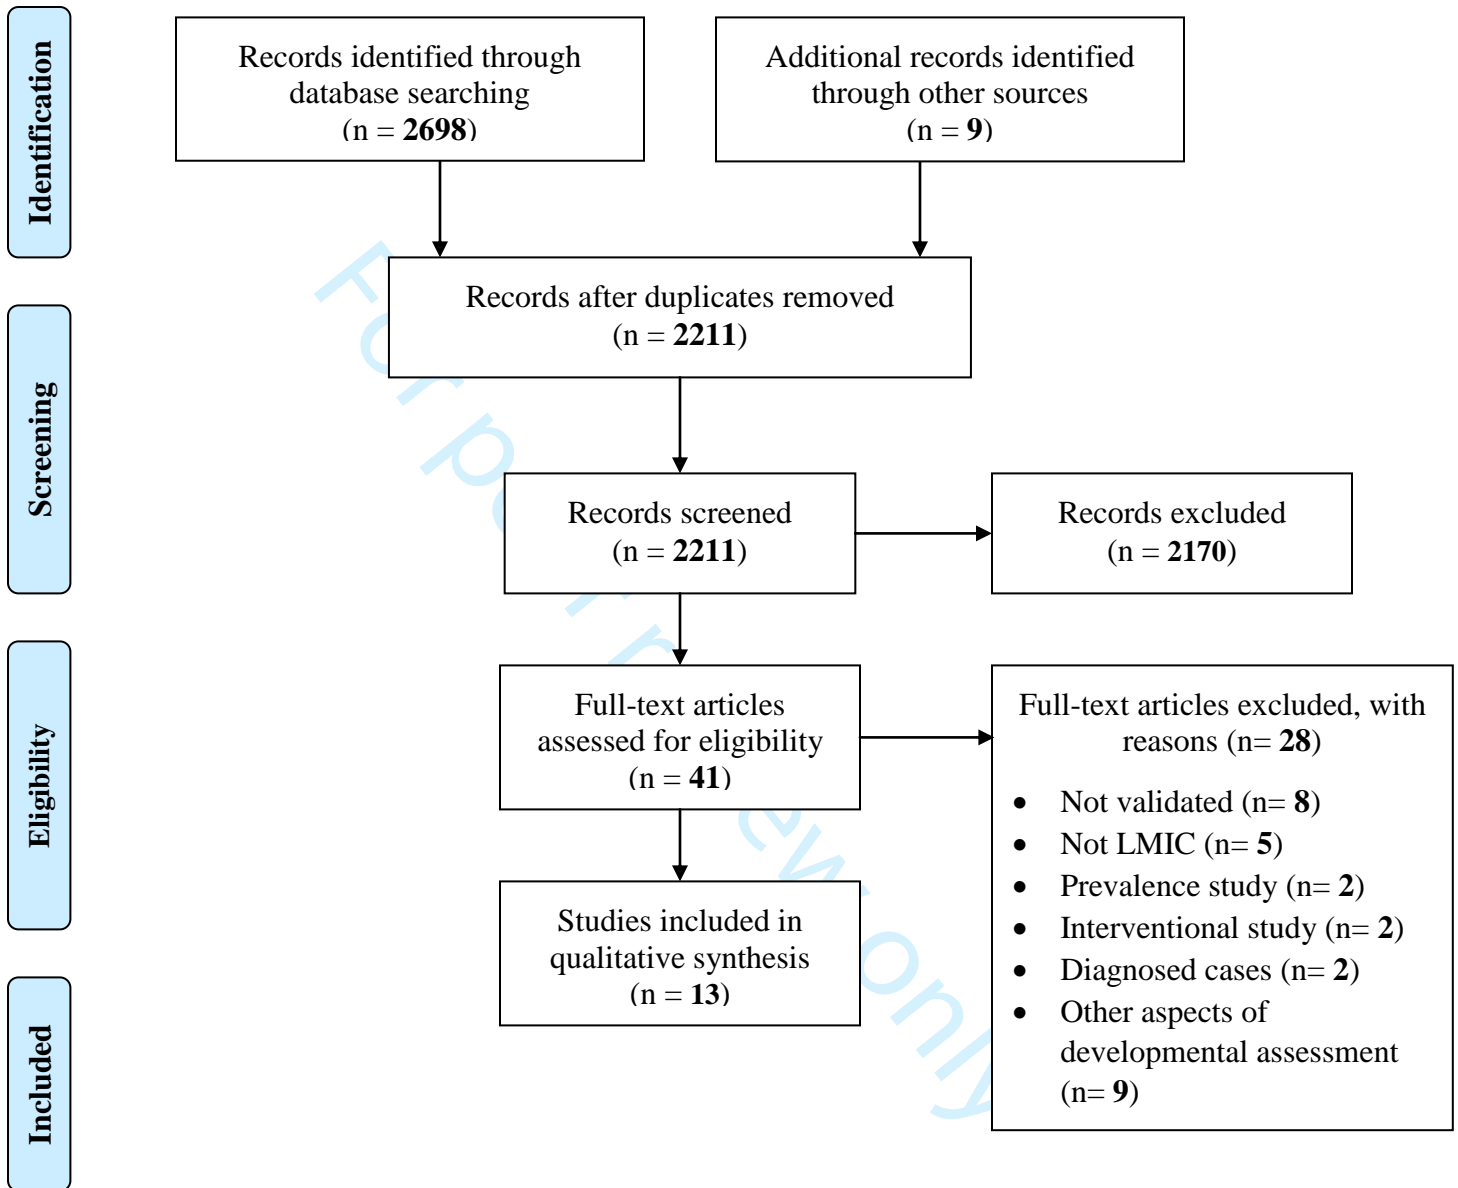

## Supplementary Table S1: Medline search strategy

**MEDLINE: Systematic review - screening for disorders in children in LMIC (as at 05.03.18)**

**Notes: No date or language limits applied.**

Database: Ovid MEDLINE <1946 to 2018 February 28>

Search Strategy:

```

1  exp Mass Screening/ (114856)
2  screen$.tw. (543259)
3  exp DIAGNOSIS/ (7780076)
4  (early adj5 (diagnos$ or identif$ or detect$ or discover$)).tw. (179324)
5  1 or 2 or 3 or 4 (8132793)
6  exp "Surveys and Questionnaires"/ (881308)
7  (survey$ or questionnaire$).tw. (745680)
8  (instrument$ or tool$).tw. (665937)
9  6 or 7 or 8 (1849661)
10 5 and 9 (774120)
11 exp Neurodevelopmental Disorders/ (162135)
12 exp Motor Disorders/ (197)
13 exp Cerebral Palsy/ (18455)
14 (cerebral adj pals$).tw. (17316)
15 CP.tw. (36947)
16 exp Cognitive Dysfunction/ (7530)
17 exp Communication Disorders/ (59072)
18 ((development$ or motor$ or speech$ or cogniti$ or behav$) adj5 (disorder$ or disabilit$ or condition$ or
impair$ or deficit$)).tw. (200268)
19 11 or 12 or 13 or 14 or 15 or 16 or 17 or 18 (415783)
20 10 and 19 (27683)
21 exp Developing Countries/ (69408)
22 exp ASIA/ (698877)
23 exp AFRICA/ (230576)
24 exp South America/ (134532)
25 asia$.tw. (100200)
26 africa$.tw. (169185)
27 (south adj1 america$).tw. (14876)
28 (low adj2 income adj2 countr$).tw. (4196)
29 (middle adj2 income adj2 countr$).tw. (7713)
30 LMIC.tw. (649)
31 21 or 22 or 23 or 24 or 25 or 26 or 27 or 28 or 29 or 30 (1214625)
32 20 and 31 (2207)
33 limit 32 to humans (2185)
34 remove duplicates from 33 (2183)
35 limit 34 to "all child (0 to 18 years)" (1270)
36 exp INFANT/ (1056001)
37 exp CHILD/ (1753019)
38 exp ADOLESCENT/ (1842871)
39 (paediatric$ or pediatric$ or child$ or adolescen$ or teen$ or infant$ or baby or babies).tw. (1586099)
40 36 or 37 or 38 or 39 (3520016)
41 34 and 40 (1313)
42 35 or 41 (1313)
*****

```



**Supplementary Table S2: Quality Assessment Tool for Diagnostic Accuracy Studies-2 rating of the selected studies**

|                                                                                                                     | [35]    | [36]    | [37]    | [38]    | [39]    | [40]    | [41]    | [42] | [43] | [44]    | [45]    | [46]    | [47]    |
|---------------------------------------------------------------------------------------------------------------------|---------|---------|---------|---------|---------|---------|---------|------|------|---------|---------|---------|---------|
| <b>DOMAIN 1: PATIENT SELECTION</b>                                                                                  |         |         |         |         |         |         |         |      |      |         |         |         |         |
| <i>A. Risk of Bias</i>                                                                                              |         |         |         |         |         |         |         |      |      |         |         |         |         |
| Was a consecutive or random sample of patients enrolled?                                                            | Yes     | No      | Yes     | No      | No      | No      | No      | No   | No   | Yes     | Yes     | No      | Yes     |
| Was a case-control design avoided?                                                                                  | Yes     | Yes  | Yes  | Yes     | Yes     | Yes     | Yes     |
| Did the study avoid inappropriate exclusions?                                                                       | Yes     | Yes     | Unclear | Yes     | Yes     | Yes     | Yes     | Yes  | Yes  | Yes     | Unclear | Unclear | Unclear |
| Could the selection of patients have introduced bias?                                                               | Low     | High    | Unclear | High    | High    | High    | High    | High | High | Unclear | Unclear | Unclear | Low     |
| <i>B. Concerns regarding applicability</i>                                                                          |         |         |         |         |         |         |         |      |      |         |         |         |         |
| Is there concern that the included patients do not match the review question?                                       | Low     | Low  | Low  | Low     | Low     | Low     | Low     |
| <b>DOMAIN 2: INDEX TEST(S)</b>                                                                                      |         |         |         |         |         |         |         |      |      |         |         |         |         |
| <i>A. Risk of Bias</i>                                                                                              |         |         |         |         |         |         |         |      |      |         |         |         |         |
| Were the index test results interpreted without knowledge of the results of the reference standard?                 | Yes     | Yes  | Yes  | Yes     | Yes     | Yes     | Yes     |
| If a threshold was used, was it pre-specified?                                                                      | Yes     | Yes  | Yes  | Yes     | Yes     | Yes     | Yes     |
| Could the conduct or interpretation of the index test have introduced bias?                                         | Low     | Low  | Low  | Low     | Low     | Low     | Low     |
| <i>B. Concerns regarding applicability</i>                                                                          |         |         |         |         |         |         |         |      |      |         |         |         |         |
| Is there concern that the index test, its conduct, or interpretation differ from the review question?               | Low     | Low  | Low  | Low     | Low     | Low     | Low     |
| <b>DOMAIN 3: REFERENCE STANDARD</b>                                                                                 |         |         |         |         |         |         |         |      |      |         |         |         |         |
| <i>A. Risk of Bias</i>                                                                                              |         |         |         |         |         |         |         |      |      |         |         |         |         |
| Is the reference standard likely to correctly classify the target condition?                                        | Yes     | Yes  | Yes  | Yes     | Yes     | Yes     | Yes     |
| Were the reference standard results interpreted without knowledge of the results of the index test?                 | Yes     | Yes     | Unclear | Yes     | Unclear | Yes     | Unclear | Yes  | Yes  | Yes     | Unclear | Unclear | Yes     |
| Could the reference standard, its conduct, or its interpretation have introduced bias?                              | Low     | Low     | Unclear | Low     | Unclear | Low     | Unclear | Low  | Low  | Low     | Unclear | Unclear | Low     |
| <i>B. Concerns regarding applicability</i>                                                                          |         |         |         |         |         |         |         |      |      |         |         |         |         |
| Is there concern that the target condition as defined by the reference standard does not match the review question? | Low     | Low  | Low  | Low     | Low     | Low     | Low     |
| <b>DOMAIN 4: FLOW AND TIMING</b>                                                                                    |         |         |         |         |         |         |         |      |      |         |         |         |         |
| <i>A. Risk of Bias</i>                                                                                              |         |         |         |         |         |         |         |      |      |         |         |         |         |
| Was there an appropriate interval between index test(s) and reference standard?                                     | Unclear | Unclear | Yes     | Unclear | Unclear | Unclear | Unclear | Yes  | No   | Yes     | Yes     | Unclear | Unclear |
| Did all patients receive a reference standard?                                                                      | No      | Yes     | No      | No      | Yes     | Yes     | Yes     | Yes  | Yes  | No      | Yes     | Yes     | No      |
| Did patients receive the same reference standard?                                                                   | Yes     | No      | Yes     | Yes     | Yes     | Yes     | Yes     | Yes  | Yes  | Yes     | Yes     | Yes     | Yes     |
| Were all patients included in the analysis?                                                                         | No      | Yes     | No      | No      | Yes     | Yes     | Yes     | Yes  | Yes  | Yes     | Yes     | Yes     | No      |
| Could the patient flow have introduced bias?                                                                        | High    | Low     | High    | Unclear | Low     | Low     | Low     | Low  | Low  | Low     | Low     | Low     | Unclear |

**Supplementary Table S3: Newcastle-Ottawa Scale scores of the selected studies**

|                                                                                                                                       | [35]           | [36] | [37] | [38] | [39] | [40] | [41] | [42] | [43] | [44] | [45] | [46] | [47] |
|---------------------------------------------------------------------------------------------------------------------------------------|----------------|------|------|------|------|------|------|------|------|------|------|------|------|
| <b>Selection: (Maximum 5 stars)</b>                                                                                                   |                |      |      |      |      |      |      |      |      |      |      |      |      |
| Representativeness of the sample                                                                                                      | *              | *    | *    | *    | *    | *    | *    | *    | *    | *    | *    | *    | *    |
| Sample size                                                                                                                           | *              | *    |      |      |      |      |      |      | *    | *    |      |      | *    |
| Non-respondents                                                                                                                       |                |      |      |      |      |      |      |      |      |      |      |      |      |
| Ascertainment of the exposure                                                                                                         | **             | **   | **   | **   | **   | **   | **   | **   | **   | **   | **   | **   | **   |
| <b>Comparability: (Maximum 2 stars)</b>                                                                                               |                |      |      |      |      |      |      |      |      |      |      |      |      |
| The subjects in different outcome groups are comparable, based on the study design or analysis.<br>Confounding factors are controlled | Not Applicable |      |      |      |      |      |      |      |      |      |      |      |      |
| <b>Outcome: (Maximum 3 stars)</b>                                                                                                     |                |      |      |      |      |      |      |      |      |      |      |      |      |
| Assessment of the outcome                                                                                                             | **             | **   | **   | **   | **   | **   | **   | **   | **   | **   | **   | **   | **   |
| Statistical test                                                                                                                      | *              |      | *    | *    | *    | *    | *    | *    | *    | *    | *    | *    | *    |

For peer review only

| Section/topic             | # | Checklist item                                                                                                                                                                                                                                                                                              | Reported on page # |
|---------------------------|---|-------------------------------------------------------------------------------------------------------------------------------------------------------------------------------------------------------------------------------------------------------------------------------------------------------------|--------------------|
| <b>TITLE</b>              |   |                                                                                                                                                                                                                                                                                                             |                    |
| Title                     | 1 | Identify the report as a systematic review, meta-analysis, or both.                                                                                                                                                                                                                                         | 1                  |
| <b>ABSTRACT</b>           |   |                                                                                                                                                                                                                                                                                                             |                    |
| Structured summary        | 2 | Provide a structured summary including, as applicable: background; objectives; data sources; study eligibility criteria, participants, and interventions; study appraisal and synthesis methods; results; limitations; conclusions and implications of key findings; systematic review registration number. | 2-3                |
| <b>INTRODUCTION</b>       |   |                                                                                                                                                                                                                                                                                                             |                    |
| Rationale                 | 3 | Describe the rationale for the review in the context of what is already known.                                                                                                                                                                                                                              | 4-7                |
| Objectives                | 4 | Provide an explicit statement of questions being addressed with reference to participants, interventions, comparisons, outcomes, and study design (PICOS).                                                                                                                                                  | 7                  |
| <b>METHODS</b>            |   |                                                                                                                                                                                                                                                                                                             |                    |
| Protocol and registration | 5 | Indicate if a review protocol exists, if and where it can be accessed (e.g., Web address), and, if available, provide registration information including registration number.                                                                                                                               | 9                  |
| Eligibility criteria      | 6 | Specify study characteristics (e.g., PICOS, length of follow-up) and report characteristics (e.g., years considered, language, publication status) used as criteria for eligibility, giving rationale.                                                                                                      | 8                  |
| Information sources       | 7 | Describe all information sources (e.g., databases with dates of coverage, contact with study authors to identify additional studies) in the search and date last searched.                                                                                                                                  | 7                  |
| Search                    | 8 | Present full electronic search strategy for at least one database, including any limits used, such that it could be repeated.                                                                                                                                                                               | Table S1           |
| Study selection           | 9 | State the process for selecting studies (i.e., screening, eligibility, included in systematic review, and, if applicable, included in the meta-analysis).                                                                                                                                                   | 8-9                |

|                                    |    |                                                                                                                                                                                                                        |                          |
|------------------------------------|----|------------------------------------------------------------------------------------------------------------------------------------------------------------------------------------------------------------------------|--------------------------|
| Data collection process            | 10 | Describe method of data extraction from reports (e.g., piloted forms, independently, in duplicate) and any processes for obtaining and confirming data from investigators.                                             | 8-9                      |
| Data items                         | 11 | List and define all variables for which data were sought (e.g., PICOS, funding sources) and any assumptions and simplifications made.                                                                                  | 8-9                      |
| Risk of bias in individual studies | 12 | Describe methods used for assessing risk of bias of individual studies (including specification of whether this was done at the study or outcome level), and how this information is to be used in any data synthesis. | 8-9                      |
| Summary measures                   | 13 | State the principal summary measures (e.g., risk ratio, difference in means).                                                                                                                                          | Sensitivity, Specificity |
| Synthesis of results               | 14 | Describe the methods of handling data and combining results of studies, if done, including measures of consistency (e.g., $I^2$ ) for each meta-analysis.                                                              | N/A                      |

Page 1 of 2

| Section/topic               | #  | Checklist item                                                                                                                                                  | Reported on page # |
|-----------------------------|----|-----------------------------------------------------------------------------------------------------------------------------------------------------------------|--------------------|
| Risk of bias across studies | 15 | Specify any assessment of risk of bias that may affect the cumulative evidence (e.g., publication bias, selective reporting within studies).                    | N/A                |
| Additional analyses         | 16 | Describe methods of additional analyses (e.g., sensitivity or subgroup analyses, meta-regression), if done, indicating which were pre-specified.                | N/A                |
| <b>RESULTS</b>              |    |                                                                                                                                                                 |                    |
| Study selection             | 17 | Give numbers of studies screened, assessed for eligibility, and included in the review, with reasons for exclusions at each stage, ideally with a flow diagram. | Fig 2 (Prisma)     |
| Study characteristics       | 18 | For each study, present characteristics for which data were extracted (e.g., study size, PICOS, follow-up period) and provide the citations.                    | 14                 |
| Risk of bias within studies | 19 | Present data on risk of bias of each study and, if available, any outcome level assessment (see item 12).                                                       | Table S2-3         |

1  
2  
3  
4  
5  
6  
7  
8  
9  
10  
11  
12  
13  
14  
15  
16  
17  
18  
19  
20  
21  
22  
23  
24  
25  
26  
27  
28  
29  
30  
31  
32  
33  
34  
35  
36  
37  
38  
39  
40  
41  
42  
43  
44  
45  
46

|                               |    |                                                                                                                                                                                                          |          |
|-------------------------------|----|----------------------------------------------------------------------------------------------------------------------------------------------------------------------------------------------------------|----------|
| Results of individual studies | 20 | For all outcomes considered (benefits or harms), present, for each study: (a) simple summary data for each intervention group (b) effect estimates and confidence intervals, ideally with a forest plot. | 14-23    |
| Synthesis of results          | 21 | Present results of each meta-analysis done, including confidence intervals and measures of consistency.                                                                                                  | N/A      |
| Risk of bias across studies   | 22 | Present results of any assessment of risk of bias across studies (see Item 15).                                                                                                                          | N/A      |
| Additional analysis           | 23 | Give results of additional analyses, if done (e.g., sensitivity or subgroup analyses, meta-regression [see Item 16]).                                                                                    | N/A      |
| <b>DISCUSSION</b>             |    |                                                                                                                                                                                                          |          |
| Summary of evidence           | 24 | Summarize the main findings including the strength of evidence for each main outcome; consider their relevance to key groups (e.g., healthcare providers, users, and policy makers).                     | 23-24    |
| Limitations                   | 25 | Discuss limitations at study and outcome level (e.g., risk of bias), and at review-level (e.g., incomplete retrieval of identified research, reporting bias).                                            | 25-26    |
| Conclusions                   | 26 | Provide a general interpretation of the results in the context of other evidence, and implications for future research.                                                                                  | 28       |
| <b>FUNDING</b>                |    |                                                                                                                                                                                                          |          |
| Funding                       | 27 | Describe sources of funding for the systematic review and other support (e.g., supply of data); role of funders for the systematic review.                                                               | N/A (29) |

From: Moher D, Liberati A, Tetzlaff J, Altman DG, The PRISMA Group (2009). Preferred Reporting Items for Systematic Reviews and Meta-Analyses: The PRISMA Statement. PLoS Med 6(6): e1000097. doi:10.1371/journal.pmed1000097

For more information, visit: [www.prisma-statement.org](http://www.prisma-statement.org).

# BMJ Open

## Screening Tools for Early Identification of Children with Developmental Delay in Low- and Middle-income Countries: A Systematic Review

|                                 |                                                                                                                                                                                                                                                                                                                                                                                                                                                                                                                                                                                                                                                                                                                                                                                                                                                                                                                                                                                                                                                                                                                              |
|---------------------------------|------------------------------------------------------------------------------------------------------------------------------------------------------------------------------------------------------------------------------------------------------------------------------------------------------------------------------------------------------------------------------------------------------------------------------------------------------------------------------------------------------------------------------------------------------------------------------------------------------------------------------------------------------------------------------------------------------------------------------------------------------------------------------------------------------------------------------------------------------------------------------------------------------------------------------------------------------------------------------------------------------------------------------------------------------------------------------------------------------------------------------|
| Journal:                        | <i>BMJ Open</i>                                                                                                                                                                                                                                                                                                                                                                                                                                                                                                                                                                                                                                                                                                                                                                                                                                                                                                                                                                                                                                                                                                              |
| Manuscript ID                   | bmjopen-2020-038182.R1                                                                                                                                                                                                                                                                                                                                                                                                                                                                                                                                                                                                                                                                                                                                                                                                                                                                                                                                                                                                                                                                                                       |
| Article Type:                   | Original research                                                                                                                                                                                                                                                                                                                                                                                                                                                                                                                                                                                                                                                                                                                                                                                                                                                                                                                                                                                                                                                                                                            |
| Date Submitted by the Author:   | 19-Aug-2020                                                                                                                                                                                                                                                                                                                                                                                                                                                                                                                                                                                                                                                                                                                                                                                                                                                                                                                                                                                                                                                                                                                  |
| Complete List of Authors:       | Faruk, Tasnuva; University of South Asia, Asian Institute of Disability and Development; Independent University, School of Public Health King, Catherine; The University of Sydney, National Centre for Immunisation Research and Surveillance (NCIRS), The Children's Hospital at Westmead<br>Muhit, Mohammad; University of South Asia, Asian Institute of Disability and Development ; CSF Global<br>Islam, Md Kafiul; Independent University, Electrical and Electronic Engineering<br>Jahan, Israt; University of South Asia, Asian Institute of Disability and Development; Central Queensland University, School of Health, Medical and Applied Sciences<br>Baset, Kamran; Independent University, School of Public Health; BRAC, Road Safety and Driving School<br>Badawi, Nadia; University of Sydney SDN, Cerebral Palsy Alliance Research Institute; University of Sydney SDN, Discipline of Child and Adolescent Health, Sydney Medical School<br>Khandaker, Gulam; University of South Asia, Asian Institute of Disability and Development ; Central Queensland Hospital and Health Service, Public Health Unit |
| <b>Primary Subject Heading</b>: | Paediatrics                                                                                                                                                                                                                                                                                                                                                                                                                                                                                                                                                                                                                                                                                                                                                                                                                                                                                                                                                                                                                                                                                                                  |
| Secondary Subject Heading:      | Neurology                                                                                                                                                                                                                                                                                                                                                                                                                                                                                                                                                                                                                                                                                                                                                                                                                                                                                                                                                                                                                                                                                                                    |
| Keywords:                       | Developmental neurology & neurodisability < PAEDIATRICS, Paediatric neurology < PAEDIATRICS, Neonatal intensive & critical care < INTENSIVE & CRITICAL CARE, Neurological injury < NEUROLOGY, Community child health < PAEDIATRICS, PUBLIC HEALTH                                                                                                                                                                                                                                                                                                                                                                                                                                                                                                                                                                                                                                                                                                                                                                                                                                                                            |
|                                 |                                                                                                                                                                                                                                                                                                                                                                                                                                                                                                                                                                                                                                                                                                                                                                                                                                                                                                                                                                                                                                                                                                                              |

SCHOLARONE™  
Manuscripts



I, the Submitting Author has the right to grant and does grant on behalf of all authors of the Work (as defined in the below author licence), an exclusive licence and/or a non-exclusive licence for contributions from authors who are: i) UK Crown employees; ii) where BMJ has agreed a CC-BY licence shall apply, and/or iii) in accordance with the terms applicable for US Federal Government officers or employees acting as part of their official duties; on a worldwide, perpetual, irrevocable, royalty-free basis to BMJ Publishing Group Ltd ("BMJ") its licensees and where the relevant Journal is co-owned by BMJ to the co-owners of the Journal, to publish the Work in this journal and any other BMJ products and to exploit all rights, as set out in our [licence](#).

The Submitting Author accepts and understands that any supply made under these terms is made by BMJ to the Submitting Author unless you are acting as an employee on behalf of your employer or a postgraduate student of an affiliated institution which is paying any applicable article publishing charge ("APC") for Open Access articles. Where the Submitting Author wishes to make the Work available on an Open Access basis (and intends to pay the relevant APC), the terms of reuse of such Open Access shall be governed by a Creative Commons licence – details of these licences and which [Creative Commons](#) licence will apply to this Work are set out in our licence referred to above.

Other than as permitted in any relevant BMJ Author's Self Archiving Policies, I confirm this Work has not been accepted for publication elsewhere, is not being considered for publication elsewhere and does not duplicate material already published. I confirm all authors consent to publication of this Work and authorise the granting of this licence.

**Title:** Screening Tools for Early Identification of Children with Developmental Delay in Low- and Middle-income Countries: A Systematic Review

**Corresponding Author:** Dr. Tasnuva Faruk

Postal Address: Asian Institute of Disability and Development (AIDD), University of South Asia, House 78, Road 14, Block B, Banani, Dhaka-1213, Bangladesh.

Telephone: +880-1717440926; E-mail: [meghbalika04@gmail.com](mailto:meghbalika04@gmail.com)

**All Authors:** Tasnuva Faruk<sup>1,2</sup>, Catherine King<sup>3</sup>, Mohammad Muhit<sup>1,4</sup>, Md Kafiul Islam<sup>5</sup>, Israt Jahan<sup>1,4,6</sup>, Kamran ul Baset<sup>2,7</sup>, Nadia Badawi<sup>8,9</sup>, and Gulam Khandaker<sup>1,4,9,10</sup>

1. Asian Institute of Disability and Development (AIDD), University of South Asia, Dhaka, Bangladesh;
2. School of Public Health, Independent University, Bangladesh, Dhaka, Bangladesh;
3. National Centre for Immunisation Research and Surveillance (NCIRS), The Children's Hospital at Westmead, Sydney, Australia;
4. CSF Global, Dhaka, Bangladesh;
5. Department of Electrical and Electronic Engineering, Independent University, Bangladesh, Dhaka, Bangladesh;
6. School of Health, Medical and Applied Sciences, Central Queensland University, Rockhampton, Queensland 4701, Australia
7. Road Safety and Driving School, BRAC, Dhaka, Bangladesh;
8. Cerebral Palsy Alliance Research Institute, University of Sydney, Sydney, Australia;
9. Discipline of Child and Adolescent Health, Sydney Medical School, University of Sydney, Sydney, Australia;
10. Public Health Unit, Central Queensland Hospital and Health Service, Rockhampton, Queensland, Australia.

**Total Word Count: 7077**



1  
2  
3 **Screening Tools for Early Identification of Children with Developmental Delay in Low-**  
4 **and Middle-income Countries: A Systematic Review**  
5  
6  
7

8 **Running head:** Screening Tools for Developmental Delay  
9

10 **Article category:** Review Article  
11  
12

13 **Abstract**  
14

15  
16  
17  
18 **Objective:** To systematically review, identify and report the screening tools used for early  
19 identification of developmental delay in Low-and Middle-Income Countries.  
20  
21

22  
23  
24 **Design:** Systematic review  
25  
26

27 **Data sources:** Four bibliographic databases: Medline (1946 to July 13, 2020), Embase (1974  
28 to July 13, 2020), Scopus (1823 to July 11, 2020), and PsycINFO (1987 to July Week 1 2020).  
29  
30  
31

32  
33 **Eligibility criteria:** Peer-reviewed original articles published in English addressing validated  
34 culturally sensitive developmental screening tools among children aged < 5 years were  
35 included in this review.  
36  
37  
38

39  
40  
41 **Data extraction and synthesis:** One author (CK, medical librarian) developed the search  
42 strategy. Three authors conducted the database search (phase 1: CK; phase 2: IJ and MKI).  
43 Two authors (TF and IJ) independently screened the title and abstracts. TF, MKI and GK  
44 independently performed the full-text review of the screened articles. During each step of the  
45 study selection process, disagreements were resolved through discussion. PRISMA statement  
46 was used to guide the systematic review. Data extraction and analysis were performed using  
47 MS Excel. Meta-analysis was not possible due to heterogeneity of the study findings.  
48  
49  
50  
51  
52  
53  
54  
55  
56  
57  
58  
59  
60

1  
2  
3 **Results:** We identified 3349 articles, of which eighteen studies from ten countries, reporting  
4 sixteen screening tools, were selected for qualitative synthesis. Six cultural contexts were  
5 explored. Twelve general, two motor and two speech-language tools were identified. Seven of  
6 them found to be parent-completed ones. Five screening tools (American Speech-Language  
7 and Hearing Association, Guide for Monitoring Child Development, Infant Neurological  
8 International Battery, New Delhi – Development Screening Questionnaire and Woodside  
9 Screening Technique) reported relatively higher sensitivity (82.5-100)% and specificity (83-  
10 98.93)%.

11  
12  
13  
14  
15  
16  
17  
18  
19  
20  
21  
22  
23 **Conclusions:** Limited number of culturally sensitive developmental screening tools were  
24 validated for children aged <5 year in Low-and Middle-Income Countries. Revising existing  
25 screening tools in different ethnic and cultural settings and subsequent validation with  
26 normative value should be a research priority.

27  
28  
29  
30  
31  
32  
33 **PROSPERO registration number** CRD42018095232

34  
35  
36 **Key words:** Developmental delay, Disability, Screening, Early diagnosis, Rehabilitation,  
37 Low and Middle-Income Countries  
38  
39  
40  
41

#### 42 **Strengths and limitations of this study**

- 43  
44 ➤ This review puts together extensive literature searches on original studies (both observational  
45 and experimental) conducted among under-5 children from LMICs reporting  
46 standardization, validity (in terms of sensitivity and specificity) of developmental screening  
47 tools in early diagnosis of developmental delay.
- 48  
49 ➤ Meta-analysis was not possible due to the heterogeneity of the study setting and findings.
- 50  
51 ➤ Critical evaluation of the available screening tools in terms of diagnostic accuracy was not  
52 possible to perform due to the unavailability of the necessary information.
- 53  
54  
55  
56  
57  
58  
59  
60

## Introduction

Developmental delay is a condition where children exhibit significant variation in achieving developmental milestones as expected for their actual or adjusted age.[1-3] Complications at birth including premature birth; brain trauma and encephalitis; severe medical problems after birth; inborn metabolic errors; genetic or chromosomal abnormalities; inadequate stimulation; malnutrition; iron deficiency anaemia; chronic illness; adverse environmental, familiar and psychological states may lead to developmental delay.[4-6] Although the condition itself may not be permanent, it can provide a foundation for recognizing children who might have more severe and permanent health conditions i.e. developmental disabilities. Apart from developmental delay, developmental disability is considered as a severe, chronic disability originating at birth or during childhood, expected to continue indefinitely, and substantially restricts the individual's functioning in several major life activities.[2, 7] Examples of developmental disabilities include Autism Spectrum Disorder, Behavioural Disorders, Cerebral Palsy, Down Syndrome, Fetal Alcohol Syndrome, Intellectual Disability, etc. As a predictive of above-mentioned learning, movement and behavioral disorders, it is possible to identify developmental delay to a great extent during the preschool period (i.e. before the age of 5 years) with the help of well validated screening tools.[8, 9] There is a long-term financial impact on society in terms of healthcare, educational support and other special services related to developmental delay and/ disability. This is because the affected children require substantial resources and increased cost over their lifespan compared to those without such conditions.[10] This further accentuates the significance of early identification to initiate appropriate interventions and/ rehabilitations with the intention of preventing further delays, stimulating emerging skills and creating a more encouraging and protective surroundings.[5]

1  
2  
3 In the last few decades, successful implementation of World Health Organization's  
4 (WHO's) key health services[11] regarding "The Countdown to 2015 Initiatives" resulted in  
5 the reduction of the neonatal mortality rate from 37 deaths per 1000 live births in 1990 to 19  
6 per 1000 live births in 2016, worldwide with a projection of further future reductions.[12, 13]  
7  
8 Among the survivors, more than 250 million under-5 children from Low-and Middle-Income  
9 Countries (LMICs) are not fulfilling their developmental potential in cognitive, motor, and  
10 social-emotional domains due to poor nutrition, poverty and conflicts.[4, 14-16] In addition to  
11 them, there is an undetected number of surviving children suffering from various forms of  
12 developmental delay presumably due to brain injury during the fetal, perinatal and post-  
13 neonatal period.[17] We have discovered that, with time, while the neonatal mortality rate is  
14 reducing, the prevalence of developmental delay is gradually increasing (by analysing the data  
15 generated from two nation-wide population-based retrospective studies conducted in Taiwan)  
16 (Supplementary Figure S1).[18, 19]  
17  
18  
19  
20  
21  
22  
23  
24  
25  
26  
27  
28  
29  
30  
31  
32  
33  
34  
35

36 Developmental screening is the first step of the comprehensive diagnostic procedure  
37 for secondary prevention and early identification of developmental delay.[16, 20, 21] Thus a  
38 well validated developmental screening tool is very important. The standardized tools available  
39 from western countries provide well-validated assessment in their own settings. However, the  
40 transfer of such western-based tools to non-western countries is linked with substantial  
41 limitations in terms of score interpretation and feasibility of their use in resource-constrained  
42 settings such as in LMICs.[22] In the developed countries, early identification of  
43 developmental delay is considered as mandatory part of good healthcare practice which is  
44 recommended by the American Academy of Pediatrics.[16] In contrast, in LMICs, most  
45 teaching and training programs of health professionals are still concentrated on acute illness  
46 and growth aspects of children rather than a developmental perspective, resulting in limited  
47  
48  
49  
50  
51  
52  
53  
54  
55  
56  
57  
58  
59  
60

1  
2  
3 attention in developmental delay.[16] Also, in these geographical areas, parents and caregivers  
4  
5 with strong cultural beliefs and superstitions regarding health not only remain ignorant of the  
6  
7 child's developmental deficit but also about the future impact of the condition.[23] The  
8  
9 combined effect of these two factors often results in overlooking or delayed the diagnosis of  
10  
11 developmental concerns.  
12  
13  
14  
15  
16

17 The perspective on developmental disability varies from one culture to another. Along  
18  
19 with economic, geographical, social factors, it often becomes a barrier to healthcare  
20  
21 accessibility for children with disability.[24] In Chinese culture, having children with disability  
22  
23 is often considered shameful for the family. In Southeast Asian cultures, parents often face  
24  
25 social deprivation due to the stigma related to developmental disability.[25] Moreover, cultural  
26  
27 beliefs often holds control over treatment approaches for developmental delay or disabilities,  
28  
29 including: (1) whether to seek help or not; (2) which treatment option to choose; (3) parental  
30  
31 expectations for their child; (4) interpersonal relationship between caregiver and healthcare  
32  
33 professionals, etc.[26] One of the biggest challenges in early identification of developmental  
34  
35 delay or disability is providing culturally sensitive screening tools, which not only include  
36  
37 cultural perception of delay and/or disability but also easily adaptable across the various  
38  
39 cultural/ nation.[22] Among the developmental domains, social development is culturally  
40  
41 specific and difficult to adapt, whereas the gross motor domain is easier to adapt culturally.[27]  
42  
43  
44  
45  
46  
47  
48

49 The purpose of this study was to look for the screening tools which have been used and  
50  
51 validated for early identification of developmental delay in LMICs, to report how effective  
52  
53 they are for early identification of developmental delay in terms of validity, and to identify  
54  
55 areas for future research.  
56  
57  
58  
59  
60

## Materials and methods

### *Data sources and search strategy*

To locate items on screening tools for early identification of developmental delay among children in low and middle-income countries, the search strategy was developed by an experienced medical librarian (Dr. Catherine King). Literature search was conducted in two phases (phase 1 up to March 2018: CK; phase 2 up to July 2020: IJ and MKI) in four bibliographic databases. The databases searched were: OVID Medline (1946 to July 13, 2020), OVID Embase (1974 to July 13, 2020), SCOPUS (1823 to July 11, 2020), and PsycINFO (1987 to July Week 1 2020). Search terms included database-specific thesaurus terms where available such as ‘Mass Screening’, ‘Diagnosis’, ‘Surveys and Questionnaires’, ‘Neurodevelopmental Disorders’, ‘Motor Disorders’, ‘Cerebral Palsy’, ‘Cognitive Dysfunction’, and ‘Communication Disorders’ as well as relevant associated text word terms. These were combined with low and middle-income country terms and infant, child and adolescent terms. To minimize the introduction of bias, no publication date and language limits were used. The date of the latest search was 13.07.2020. The Medline search strategy could be found online as Supplementary Table S1.

In addition to bibliographic database searches, we manually checked the reference lists of recent systematic reviews [28, 29] as well as articles included in the full-text review. We also contacted experts in the field to identify any additional studies or information.

### *Selection criteria*

Study inclusion criteria were: (1) Children aged less than 5 years who were at risk of developmental delay; (2) Original studies (both observational and experimental); (3) Study where single, as well as multiple developmental domains, were examined; (4) Studies

1  
2  
3 conducted only in LMICs. The exclusion criteria were: (1) Studies conducted on diagnosed  
4 cases of developmental delay; (2) Studies focusing on autism spectrum disorder and other  
5 behavioural disorders; (3) Studies conducted among HIV exposed children; (4) Studies on  
6 developmental delay among children aged more than 5 years; (5) Interventional studies on  
7 developmental delay; (6) Studies on developmental delay published before 1946; (7) Article  
8 published in languages other than English; (8) Conference papers, letter to the editor, protocols,  
9 systematic reviews and ongoing studies; (9) Study conducted among children of eligible ethnic  
10 origin but in different country settings (i.e. children adopted from LMICs but study conducted  
11 in higher income countries). List of key definitions regarding study selection are available in  
12 Supplementary Table S2.  
13  
14  
15  
16  
17  
18  
19  
20  
21  
22  
23  
24  
25  
26  
27  
28

29 All the under-5 children who weren't previously diagnosed with any  
30 neurodevelopmental delay or disability, were considered as "at risk of developmental delay".  
31 Studies where overall or categorised (based on different age group/ cut off score) sensitivity-  
32 specificity of screening tools were examined and clearly reported, were considered as  
33 validated. We did not discriminate among screening, monitoring and surveillance tools. If any  
34 of those tools were validated for screening developmental delay among under-5 children,  
35 considered eligible for inclusion. Tools which were declared as assessment tools by the  
36 developer themselves as well as studies where a tool was utilized for developmental assessment  
37 by the researchers, were excluded from the review.  
38  
39  
40  
41  
42  
43  
44  
45  
46  
47  
48  
49  
50

51 When we had searched the keywords "Autism Spectrum Disorder" and  
52 "Developmental Delay" in the medical databases, the number of search items were as follows-  
53  
54 i) OVID Medline- 9320: 12402; ii) OVID Embase- 21750: 7506; iii) Scopus- 20675: 7530 and  
55  
56 iv) PsycINFO- 17130: 3067, respectively. Which is a bit alarming. We have excluded autism  
57  
58  
59  
60

1  
2  
3 and other behavioural disorders from the study to provide undivided attention to developmental  
4 delay. Apart from scientific community, parents, and caregivers of LMICs are more familiar  
5 with the term ASD compared to Developmental Delay. Which is evident from growing  
6 concerns regarding speech-language and behavioural domains of child development compared  
7 to rest of the domains.[30] We believe, to ensure successful developmental screening/  
8 surveillance program in LMICs in the long run, and more importantly, to raise public awareness  
9 about developmental delay; we need to work more in this area than we used to.

10  
11  
12  
13  
14  
15  
16  
17  
18  
19  
20  
21  
22 LMICs consist of countries belonging to three World Bank income groups (low, lower-  
23 middle, upper-middle, and high) of WHO's Member States. The classification is based on the  
24 estimated per capita gross national income. We have used the World Bank's country  
25 classifications by income level (2020-2021) in this review.[31, 32]

### 26 27 28 29 30 31 32 33 ***Study selection, data extraction and quality appraisal***

34  
35 We carried out the following steps to decide on the studies: (1) Searching the above-mentioned  
36 databases using similar search strategy (CK, IJ, MKI); (2) Deduplicating and merging search  
37 results using the EndNote bibliographic software (TF); (3) Examining titles and abstracts to  
38 remove obviously irrelevant reports (TF, IJ); (4) Retrieving and examining the full text reports  
39 of eligible studies (TF, MKI, GK); (5) Applying the selection criteria on the shortlisted articles  
40 (TF, GK); (6) Making final decisions on study inclusion and proceeding for data collection.  
41  
42 Extracted information included: publication year, the country where the study was conducted,  
43 the name of the screening tool, the gold standard tool(s) against which the screening tool was  
44 validated, study design, study setting, sample size, sampling technique, the age of the  
45 participants, selection criteria and sensitivity-specificity of the screening tools. During each  
46 step of the study selection process, disagreements were resolved through discussion. We used  
47  
48  
49  
50  
51  
52  
53  
54  
55  
56  
57  
58  
59  
60



1  
2  
3 the Preferred Reporting Items for Systematic Reviews and Meta-Analyses (PRISMA)  
4 statement, including 27- item PRISMA checklist to guide the systematic review.[33] The  
5 included studies has been screened and assessed for risk of bias according to PRISMA  
6 checklist. The following domains has been evaluated to ensure the quality of the studies: study  
7 design, data collection method and selection bias.  
8  
9  
10  
11  
12  
13  
14  
15  
16  
17  
18

### 19 ***Data analysis***

20  
21 Individual study findings were reported including the country, study design, study setting,  
22 sample size, sampling technique, proportions and age range of participants, sensitivity-  
23 specificity of the developmental screening tools etc. Data extraction and analysis were  
24 performed using MS Excel. We were unable to perform a meta-analysis due to the  
25 heterogeneity of the study setting and findings.  
26  
27  
28  
29  
30  
31  
32  
33  
34

### 35 ***Protocol registration and ethical approval***

36  
37 The protocol of this systematic review has been registered in PROSPERO (registration number  
38 CRD42018095232). As this systematic review did not directly involve human or animal  
39 subjects, or access to medical records; ethical approval was not required.  
40  
41  
42  
43  
44  
45  
46

## 47 **Results**

### 48 ***Search results***

49  
50  
51 The initial search retrieved 3349 records. We have found 3320 records from four bibliographic  
52 databases (1555 from OVID Medline, 1317 from OVID Embase, 348 from Scopus and 100  
53 from PsycINFO). 29 records were located by reviewing the reference lists of recent systematic  
54  
55  
56  
57  
58  
59  
60

1  
2  
3 reviews, fully extracted articles and consulting expert researchers in this area. There were 2838  
4  
5 unique records once duplicates were removed. Following the screening of title and abstracts  
6  
7 for articles, which described the validation of tools to screen out developmentally delayed  
8  
9 children, 99 articles were selected for further evaluation. After further review and application  
10  
11 of selection criteria, 18 articles were selected for inclusion in study.[34-51] A PRISMA flow  
12  
13 diagram has been prepared to illustrate the study selection process (as shown in Fig. 1).  
14  
15  
16  
17  
18

### 19 ***Summary of the included studies***

20  
21 All of the eighteen studies included for qualitative synthesis were original articles published in  
22  
23 English, with a publication date range from 1991 to 2020 inclusive. Eight studies originated in  
24  
25 “South Asia”, [34, 37, 40, 42, 44, 47, 50, 51] four studies from “East Asia and Pacific”, [35, 43,  
26  
27 45, 46] three studies from “Sub-Saharan Africa”, [41, 48, 49] one study each from the “Middle  
28  
29 East and North Africa”, [39] “Latin America and Caribbean”, [36] and “Europe and Central  
30  
31 Asia” [38] region of the World Bank. region. In total, sixteen developmental screening tools  
32  
33 were used in ten countries. Among the sixteen screening tools, American Speech-Language  
34  
35 and Hearing Association (ASHA), Language Evaluation Scale Trivandrum for 0-3 years LEST  
36  
37 (LEST 0-3) focus on language domain; Infant Neurological International Battery (INFANIB)  
38  
39 and Little Developmental Coordination Disorder Questionnaire (Little DCDQ) work on motor  
40  
41 domains. The remaining tools are general developmental screening tools. A brief description  
42  
43 of the selected screening tools is provided in Table 1.  
44  
45  
46  
47  
48  
49  
50  
51  
52  
53  
54  
55  
56  
57  
58  
59  
60

**Table 1:** Brief description of the selected screening tools

| Screening Tool                                                                | Country of Origin | Study Country | Concerned Age      | Parent-Reported Version | Questionnaire Type | Number of Questionnaires | Number of items     | Developmental Domain                                                                                         | Validated Against                                                                                                      |
|-------------------------------------------------------------------------------|-------------------|---------------|--------------------|-------------------------|--------------------|--------------------------|---------------------|--------------------------------------------------------------------------------------------------------------|------------------------------------------------------------------------------------------------------------------------|
| <b>Ages and Stages Questionnaire (ASQ)</b>                                    | USA               | India, China  | 1–66 months        | Yes                     | Q & A              | 21 age sets              | 30 items per set    | Communication, gross motor, fine motor, problem solving, personal-social                                     | Developmental Assessment Scales for Indian Infants (DASII) [34]<br>Bayley Scales of Infant Development (BSID-III) [35] |
| <b>American Speech-Language and Hearing Association (ASHA)</b>                | USA               | Brazil        | 0-5 years          | No                      | Q & A              | 7 age sets               | 6-13 items          | Language reception and expression                                                                            | ABFW test [36]                                                                                                         |
| <b>Development Screening Questionnaire (DSQ)</b>                              | Bangladesh        | Bangladesh    | birth to 24 months | No                      | Q & A              | 24 age sets              | 8 questions per set | Gross motor, fine motor, vision; hearing, cognition, socialization, behavior, and speech                     | Rapid Neurodevelopmental Assessment (RNDA) [37]                                                                        |
| <b>Guide for Monitoring Child Development (GMCD)</b>                          | Turkey            | Turkey        | 0-3.5 years        | Yes                     | Q & A              | Single                   | 7 items             | Expressive language and communication, Receptive language, Fine and gross motor, Social-emotional, Self-help | Bayley Scales of Infant Development (Bayley-II) [38]                                                                   |
| <b>Infant Neurological International Battery (INFANIB)</b>                    | USA               | Iran          | 0 to 18 months     | No                      | Not found          | Single                   | 20-items            | Gross motor                                                                                                  | Developmental Assessment by Pediatric Neurologist [39]                                                                 |
| <b>Language Evaluation Scale Trivandrum for 0-3 years (LEST 0-3)</b>          | India             | India         | 0 to 3 years       | No                      | Chart              | Single                   | 33 items            | Speech and language                                                                                          | Receptive Expressive Emergent Language Scale [40]                                                                      |
| <b>Little Developmental Coordination Disorder Questionnaire (Little DCDQ)</b> | Canada            | South Africa  | 3-5 years          | Yes                     | Q & A              | Single                   | 15 items            | Gross motor, fine motor                                                                                      | Movement Assessment Battery for Children -2 [41]                                                                       |
| <b>Lucknow Developmental Screen (LDS)</b>                                     | India             | India         | birth to 24 months | Yes                     | Chart              | Single                   | 27 item             | Motor, mental, language, social                                                                              | Developmental Assessment Scales for Indian Infants (DASII) [42]<br>Vineland Social Maturity Scale [42]                 |
| <b>Mongolian Rapid Baby Scale (MORBAS)</b>                                    | Mongolia          | Mongolia      | 0 to 42 months     | No                      | Written            | Single                   | 161 item            | Cognitive, receptive communication, expressive communication, fine                                           | Bayley Scales of Infant and Toddler Development (BSID-III) [43]                                                        |

|                                                                 |              |              |                     |     |           |            |          |                                                                                                                                                    |                                                                                                                                    |
|-----------------------------------------------------------------|--------------|--------------|---------------------|-----|-----------|------------|----------|----------------------------------------------------------------------------------------------------------------------------------------------------|------------------------------------------------------------------------------------------------------------------------------------|
|                                                                 |              |              |                     |     |           |            |          | motor, gross motor, social-emotional, adaptive behavior                                                                                            |                                                                                                                                    |
| <b>New Delhi – Development Screening Questionnaire (ND-DSQ)</b> | India        | India        | 9 to 18 months      | Yes | Q & A     | 2 age sets | 20 items | General screening tool (domains not explicitly mentioned)                                                                                          | Developmental Assessment Scales for Indian Infants (DASII) [44]                                                                    |
| <b>Parent Evaluation of Developmental Status (PEDS)</b>         | USA          | Thailand     | birth to 8 years    | Yes | Q & A     | Single     | 10 items | Global /cognitive, speech / expressive language, receptive language, behavior, social-emotional, school, self-help, fine motor, gross motor, other | Parent Evaluation of Developmental Status: Developmental Milestones, Assessment Level [45]<br>Mullen Scales of Early Learning [46] |
| <b>Rapid Prescreening Denver Questionnaire (R-PDQ)</b>          | USA          | India        | 0-6 years           | No  | Q & A     | 4 age sets | 25 items | Gross motor, fine motor activity, personal-social, language                                                                                        | Denver Developmental Screening Test (DDST) [47]                                                                                    |
| <b>Road to Health Booklet Developmental Checklist (RTHB-DC)</b> | South Africa | South Africa | 14 weeks to 6 years | No  | Checklist | Single     | 21 items | Gross motor, fine motor, communication, vision, hearing                                                                                            | Parent Evaluation of Developmental Status (PEDS) [48]<br>Parent Evaluation of Developmental Status: Developmental Milestones [48]  |
| <b>Ten Questions Screening Instrument (TQSI)</b>                | Multiple     | Benin        | 2 to 9 years        | Yes | Q & A     | Single     | 10 items | Vision, hearing, seizure, cognition, motor                                                                                                         | Mullen Scales of Early Learning [49]                                                                                               |
| <b>Trivandrum Developmental Screening Chart (TDSC)</b>          | India        | India        | 0 to 2 years        | No  | Chart     | Single     | 17 items | Mental, motor, vision, hearing                                                                                                                     | Denver Developmental Screening Test (DDST) [50]                                                                                    |
| <b>Woodside System Screening Technique (WSST)</b>               | Scotland     | India        | 0 to 4 years        | No  | Chart     | Single     | 70 items | 'Social', 'Hearing and language', 'Vision and fine motor', and 'Gross motor                                                                        | Gesell's Developmental Schedules (GDS) [51]                                                                                        |

### ***Participant characteristics***

All the studies involved males and females, age range 0 to 5 years. The smallest sample size was 53 and the largest was 1945. The studies explored the following cultural contexts: East Asia and Pacific (China, Mongolia, Thailand), Europe and Central Asia (Turkey), Latin America and the Caribbean (Brazil), Middle East and North Africa (Iran) South Asia (Bangladesh, India) Sub-Saharan Africa (Benin, South Africa). Selection criteria used for participation in those studies are stated in Supplementary Table S3.

### ***Study characteristics***

All the included studies were cross-sectional in nature. Among the eighteen studies, one study was conducted in the community and tertiary hospital simultaneously,[50] eight were conducted in the tertiary hospital,[34, 38, 39, 42-46] five were conducted in the community,[35, 36, 40, 47, 51] and one study each was conducted in a nursery school setting[41] and primary health care clinic setting.[48] In the remaining two studies, screening was done in the community followed by a hospital-based detailed assessment in one[37] and primary health care clinic-based assessment in another.[49]

### ***Validated screening tools***

#### *The Ages and Stages Questionnaire (ASQ)*

This is a parent-completed questionnaire that could be used as a general developmental screening tool. The ASQ was designed and developed by J. Squires and D. Bricker, at the University of Oregon and can be completed in 12-18 minutes.[52] The questionnaire has 30 items focusing on five domains of child development, named gross motor, fine motor, problem-solving, communication, and personal-social. Obtaining lower scores than the cut off in any domain is considered as “screen positive”. The latest version of ASQ, ASQ-3, has 21 sets of questionnaires, appropriate for children aged 1–66 months.[53] In the study by Juneja et al.,

1  
2  
3 2012; a Hindi adaptation of an older version of ASQ, (ASQ-2, which had 19 sets of  
4 questionnaires for 4 to 60 months aged children) was used in a convenience sample of 200  
5  
6  
7 children divided into 4 age groups: 4, 10, 18 and 24 months, in a tertiary hospital setting.[34]  
8  
9  
10 Each age group consisted of 30 low risk and 20 high-risk children. High-risk status was  
11  
12 determined by the presence of any of the following risk factors: prematurity, low birth weight,  
13  
14 history of neonatal hospitalization, history of central nervous system infection, history of  
15  
16 afebrile seizure, diagnosed cases of developmental disorder and chromosomal abnormalities.  
17  
18 Children without these risk factors were treated as being in the low-risk group. Eventually, 4,  
19  
20 10, 18 and 24 months questionnaires of ASQ-2 were validated against “Developmental  
21  
22 Assessment Scales for Indian Infants (DASII)”, considered as a gold standard for  
23  
24 developmental assessment tool among Indian children.[34] The overall sensitivity and  
25  
26 specificity of ASQ-2 for Indian children were found to be 83.3% and 75.4% respectively.  
27  
28  
29  
30  
31  
32

33 In the study by Yue et al., 2019; Chinese adaptation of ASQ-3 was used among 1831  
34  
35 children aged 5 to 24 months in a cluster random sample from rural China. Eventually the tool  
36  
37 was validated against the Bayley Scales of Infant and Toddler Development-III. Overall  
38  
39 sensitivity and specificity of ASQ-3 found to be 76.52% and 40.97%, respectively. The authors  
40  
41 suggested to avoid using ASQ-3 for children lower than 13 months of age as well as children  
42  
43 whose primary caregiver aren't their mother, due to poor performance in those group of  
44  
45 children.[35]  
46  
47  
48  
49  
50

#### 51 *American Speech-Language and Hearing Association Screening Tool (ASHA)*

52  
53 The ASHA was designed and developed by the American Speech-Language and Hearing  
54  
55 Association to screen out under-5 children for language delay in receptive and expressive  
56  
57 language domain. There are 7 age sets consisting of 6-13 questions per age set. Cut-off score  
58  
59  
60

1  
2  
3 for screen positive result varies from one age set to another. In general, if a child gets more  
4 than two negative answers in any domain will be considered as “screen positive”. In the study  
5 conducted by Dias et. al, 2020; 1000 under-5 children were screened for language delay during  
6 a polio vaccination campaign in Sao Paulo, Brazil by utilizing the tool. Later detailed  
7 assessment was conducted using ABFW Child Language Test. ASHA found to have excellent  
8 sensitivity and specificity (82.5% and 98.93%, respectively) against ABFW Child Language  
9 Test.[36] The authors recommended to adapt the instrument for bilingual children as well as  
10 validating it in larger sample size.  
11  
12  
13  
14  
15  
16  
17  
18  
19  
20  
21  
22  
23  
24

#### 25 *Development Screening Questionnaire (DSQ)*

26  
27 The DSQ was designed and developed in Bangladesh, to be administered to mothers of children  
28 from birth to 24 months of age to screen their child’s neurodevelopmental status. The DSQ has  
29 24 age sets with 8 questions per set related to eight functional domains, named: gross motor,  
30 fine motor, vision; hearing, cognition, socialization, behaviour and speech.[37] Any child  
31 found to be positive on one or more functional domain is considered “screen positive”. In a  
32 study conducted in urban Bangladesh, a random sample of 197 children aged 0-24 months was  
33 screened in the community with DSQ, and then a detailed developmental assessment was done  
34 in a tertiary hospital with the help of the “Rapid Neurodevelopmental Assessment” tool as the  
35 gold standard. Overall sensitivity and specificity of DSQ for under 2-year-old Bangladeshi  
36 children was found to be 47.1% and 97.2% respectively.[37] Despite moderate sensitivity, the  
37 DSQ might be advantageous for resource-poor settings due to its high specificity.  
38  
39  
40  
41  
42  
43  
44  
45  
46  
47  
48  
49  
50  
51  
52

#### 53 *Guide for Monitoring Child Development (GMCD)*

54  
55 The GMCD was designed and developed in Turkey to monitor development of 0-3.5 years old  
56 children in LMICs. The tool consists of 7 open ended questions focusing on the following  
57  
58  
59  
60

1  
2  
3 domains- Expressive language and communication, Receptive language, Fine and gross motor,  
4  
5 Social-emotional, Self-help. Children declared screened positive if they failed to demonstrate  
6  
7 one or more age appropriate milestones. In a study conducted by Ertem et. al. 2008; GMCD  
8  
9 was validated against Bayley Scales of Infant Development (Bayley-II) in a random sample 79  
10  
11 Turkish children of 1-24 months of age. The overall sensitivity and specificity of GMCD were  
12  
13 found to be 88% and 93% respectively.[38]  
14  
15  
16

### 17 18 *Infant Neurological International Battery (INFANIB)*

19  
20 The INFANIB was established by Ellison and Browning in 1985 to assess the gross motor  
21  
22 function of children aged 0 to 18 months. The tool contains 20-items focusing on spasticity,  
23  
24 vestibular function, head and trunk, French angles and legs.[54] In the study by Soleimani and  
25  
26 Dadkhah, 2006; a consecutive sample of 6150 children were screened using INFANIB and  
27  
28 classified as normal, transiently abnormal and abnormal. To validate the tool a random sample  
29  
30 of 153 children from the above-mentioned groups were assessed by pediatric neurologists. It  
31  
32 was found that overall sensitivity and specificity of INFANIB for Iranian children were 90%  
33  
34 and 83% respectively.[39]  
35  
36  
37  
38

### 39 40 *Language Evaluation Scale Trivandrum (LEST 0-3)*

41  
42 Designed and developed at the Child Development Centre of the Trivandrum Government  
43  
44 Medical College, India, LEST (0-3) is a 33 items screening tool to screen out language delay  
45  
46 among 0 to 3 years old children.[40] The LEST (0-3) was validated against the “Receptive-  
47  
48 Expressive Emergent Language Scale” tool as a gold standard in a community sample of 643  
49  
50 Indian children aged 0 to 36 months. To decide on the best possible combination, researchers  
51  
52 considered both “one item delay” and “two items delay” as screen positive. When one item  
53  
54 delay considered as screen positive, sensitivity and specificity of LEST (0-3) found to be 95.8%  
55  
56 and 77.5% respectively. Similarly, when two items delay measured as screen positive, the  
57  
58  
59  
60



1  
2  
3 sensitivity and specificity obtained as 66.7% and 94.8% respectively.[40] It should be noted  
4 that the original version of Receptive-Expressive Emergent Language Scale (1971) was used  
5  
6 in this study for validation due to the lack of age-appropriate language assessment tool for  
7  
8 language delay.  
9  
10

### 11 12 13 *Little Developmental Coordination Disorder Questionnaire (Little DCDQ)* 14

15 The Little DCDQ was developed by Rithman and colleagues in Canada to assess gross motor  
16 and fine motor function of children between 3 to 5 years of age. It is a parent-reported  
17 questionnaire with 15 items under three main components, control during execution, fine motor  
18 execution and overall coordination.[41] The Little DCDQ was validated against the Movement  
19 Assessment Battery for Children-2 as a gold standard in a group of 53 South African  
20 preschoolers between 3 to 5 years of age, with Afrikaans, Tswana or English speaking  
21 parents.[41] With 57.14% sensitivity and 81.25% specificity, Little DCDQ had the potential to  
22 be used in South African culture, however, some adjustments would be required.  
23  
24  
25  
26  
27  
28  
29  
30  
31  
32  
33  
34

### 35 *Lucknow Development Screen (LDS)* 36

37 The LDS was developed in CSM Medical University, Lucknow, India, using selected  
38 milestones from Baroda Development Screening Test. It is a 27 items chart format tool,  
39 covering four domains namely motor, mental, language and social. Suitable for children aged  
40 0 to 24 months. The LDS is said to be easily administrable by interviewing parents or  
41 caregiver.[42] In a study conducted in India, the LDS tool was validated against the DASII and  
42 the Vineland Social Maturity Scale. They administered the tool to mothers of a sample of 142  
43 children, aged between 6 to 24 months, attending Pediatric Outpatients or Neurology Clinic of  
44 CSM Medical University, Lucknow, India. The screening tool was translated into Hindi for  
45 easy understanding and administration. For 3 children among the sample size of 142, Vineland  
46 Social Maturity scale was used as a gold standard, as DASII couldn't be applied to them. It is  
47  
48  
49  
50  
51  
52  
53  
54  
55  
56  
57  
58  
59  
60

1  
2  
3 claimed that the LDS has a great potential to be used as a community screening tool among  
4 Indian children, with an overall sensitivity of 95.9% and specificity 73.1%.[42]  
5  
6  
7

#### 8 9 *Mongolian Rapid Baby Scale (MORBAS)*

10  
11 The MORBAS is a written developmental screening test, designed and developed in Mongolia.  
12  
13 It has 161 items arranged under seven developmental domains, namely gross motor, fine motor,  
14 cognitive, expressive language, receptive language, social-emotional and adaptive behaviour.  
15  
16 The tool is suitable for children aged 0 to 42 months.[43] In a study conducted in Mongolia,  
17  
18 MORBAS was administered in a convenience sample of 150 Mongolian children aged 0 to 42  
19  
20 months and thus validated against the Bayley Scales of Infant and Toddler Development-III.  
21  
22 With sensitivity 81.8% and specificity 52.3%,[43] MORBAS could be useful in the long run  
23  
24 to screen out children for early intervention and rehabilitation.  
25  
26  
27  
28  
29

#### 30 31 *New Delhi – Development Screening Questionnaire (ND-DSQ)*

32  
33 The ND-DSQ was developed by Jain and colleagues, at Chacha Nehru Bal Chikitsalaya, a  
34  
35 tertiary hospital of northern India. ND-DSQ has 20 items, two age sets (9 months and 18  
36  
37 months) and applicable for children aged 9 to 18 months.[44] The items mentioned were  
38  
39 milestone specific. Thus, no explicit mention of the developmental domains was found. In the  
40  
41 study by Jain et al., 2017; ND-DSQ was validated against DASII in a convenience sample of  
42  
43 200 children aged 9 and 18 months (with 100 children per age group). It was established that  
44  
45 the 9-month questionnaire was 100% sensitive and 87.2% specific for Indian children.  
46  
47 Correspondingly, the 18 months questionnaire was validated with 91.4% sensitivity and 88.7%  
48  
49 specificity.[44] As a newly developed tool, the ND-DSQ is promising to be useful for Indian  
50  
51 and similar cultural settings.  
52  
53  
54  
55

#### 56 57 *Parent Evaluation of Developmental Status (PEDS)*

1  
2  
3 This tool was developed in 1997 by F. P. Glascoe at Tennessee, USA.[55] It is the only  
4 screening tool available to date that addresses parent's concern about children's development  
5 in the following domains: gross motor, fine motor, cognitive, expressive language, receptive  
6 language, behaviour, social-emotional, self-help, school and other.[56] It has ten open-ended  
7 questions under ten areas of parental concerns, applicable for children aged 0 to 8 years. The  
8 other category allows parents to express concerns not already addressed under previous  
9 categories. This unique property makes PEDS unique as a developmental screening tool. In  
10 PEDS, parental concerns are labelled as "predictive" (significant) and "non-predictive" (non-  
11 significant). Thus, children are screened as low risk, moderate risk and high-risk group if they  
12 have no or non-predictive concerns, one predictive concern and two predictive concerns,  
13 respectively.[45]

14  
15  
16  
17  
18  
19  
20  
21  
22  
23  
24  
25  
26  
27  
28  
29  
30 In the study by Chunuwan et al., 2016; the PEDS- Thai was validated against the  
31 "Parent Evaluation of Developmental Status: Developmental Milestones, Assessment Level"  
32 in a tertiary hospital. A convenience sample of 266 children of 9, 18 and 30 months of age was  
33 selected. Screen positive children were assembled as "high risk" ( $\geq 2$  significant concerns) and  
34 "moderate or high risk" ( $\geq 1$  significant concern) group. Sensitivity and specificity of PEDS  
35 against Parent Evaluation of Developmental Status: Developmental Milestones, Assessment  
36 Level for the high-risk group was established as 27.7% and 93.0%, respectively. For moderate  
37 or high-risk group, the tool was 67.7% sensitive and 60.7% specific.[45] In order to avoid  
38 unnecessary/over-referral, the authors suggested to practice second stage evaluation (using  
39 Parent Evaluation of Developmental Status: Developmental Milestones, ASQ, Denver-II etc.  
40 tools) alongside/after PEDS screening.

41  
42  
43  
44  
45  
46  
47  
48  
49  
50  
51  
52  
53  
54  
55  
56 In another study by Wantanakorn et al., 2016; they validated the PEDS- Thai against  
57 the Mullen Scales of Early Learning tool as a gold standard in a convenience sample of 137  
58  
59  
60

1  
2  
3 children aged 18 to 36 months in another tertiary hospital. It was found that the PEDS-Thai is  
4 a promising tool for Thai cultural backgrounds with overall sensitivity of 92.8% and specificity  
5 49.2%.[46] According to the authors, “the relatively low specificity of PEDS seen here may be  
6 because of the excessive concern of parents regarding their child’s development, especially  
7 who are in relatively high socioeconomic status”. The selection bias of participants was  
8 mentioned as the major limitation of the study. Thus, they advised further evaluation of the  
9 diagnostic performances of the tool using a representative sample of the population.  
10  
11  
12  
13  
14  
15  
16  
17  
18  
19

### 20 *Rapid Pre-screening Denver Questionnaire (R-PDQ)*

21  
22 The R-PDQ is a general developmental screening tool covering four developmental domains:  
23 gross motor, fine motor activity, personal-social and language.[47] It has four age sets  
24 applicable for children aged 0 to 6 years: 0 to 9 months, 9 to 24 months, 2 to 4 years and 4 to  
25 6 years. Each questionnaire contained 25 items. To score a child, the responding person had  
26 to keep answering the questions until there were three negative responses under a specific  
27 domain. In the study by Awasthi et al., 1997; the 2 to 4 years questionnaire of R-PDQ was  
28 validated against the Denver Developmental Screening Test. The study participants were  
29 randomly selected 126 children living in urban slums of Lucknow, India. To validate the tool,  
30 when a delay in more than one domain was considered as the cut-off, the tool was revealed to  
31 be 100% sensitive and 7.8% specific. Similarly, when a delay in more than two domains was  
32 considered as the cut-off, the sensitivity and specificity were found to be 18.2% and 42.6%,  
33 respectively.[47] Inconvenient validity and high referral rate compared to US children were  
34 explained by the presence of various “difficult to interpret” questions and Denver  
35 Developmental Screening Test being an unsuitable gold standard for R-PDQ.  
36  
37  
38  
39  
40  
41  
42  
43  
44  
45  
46  
47  
48  
49  
50  
51  
52  
53  
54

### 55 *Road to Health Booklet Developmental Checklist (RTHB-DC)*

1  
2  
3 The RTHB-DC was prepared as an integrated part of The Road to Health Booklet, the revised  
4 version of which was introduced in October 2010. RTHB-DC is the only developmental  
5 surveillance and screening tool, currently implemented nationally in South Africa. The tool  
6 consists of 21 questions covering gross motor, fine motor, communication, vision, and hearing  
7 domains. The checklist is applicable for children aged 14 weeks to 6 years.[57] In the study by  
8 Linde et al., 2015; RTHB-DC was validated against PEDS and Parent Evaluation of  
9 Developmental Status: Developmental Milestones tools. The sample size was 201, consisting  
10 of children aged 6 to 12 months old. In a primary health care clinic setting in South Africa, the  
11 sensitivity of the tool was found to be very low, i.e. 25% compared to reasonably high  
12 specificity of 91%.[48] Further development of the tool has been suggested by the authors  
13 incorporating consistent age gaps and inclusion of all developmental domains.  
14  
15  
16  
17  
18  
19  
20  
21  
22  
23  
24  
25  
26  
27  
28

### 29 *Ten Questions Screening Instrument (TQSI)*

30  
31 The TQSI Screening Instrument was developed in 1984 as part of a pilot study conducted by  
32 the University of Columbia, USA, for use in resource-poor countries.[58, 59] TQSI is a parent  
33 reported tool comprising of ten questions addressing motor, cognitive, vision, hearing, and  
34 seizure status. A child is considered screen positive if any of the questions are found to be  
35 positive. The tool is appropriate for children aged 2 to 9 years. In a study by Koura et al., 2013;  
36 the TQSI was validated against the Mullen Scales of Early Learning in a sample of 357 children  
37 aged 12 months.[49] The participants were the offspring of the mothers who were enrolled in  
38 the “Malaria in Pregnancy Preventive Alternative Drugs” trial. To adjust the tool for that age  
39 group, researchers had excluded the language domain which is applicable for children above 2  
40 years. In that study, screening was done in the community followed by a detailed assessment  
41 done in the health centre. It was found that the overall tool had reasonably high sensitivity  
42 (81%) but poor specificity (31%) for children of Benin. This is compared to the 76.5%  
43 sensitivity and 75.7% specificity where only the motor domain was considered.[49] Mullen  
44  
45  
46  
47  
48  
49  
50  
51  
52  
53  
54  
55  
56  
57  
58  
59  
60

1  
2  
3 Scales of Early Learning was used due to lack of a gold standard assessment tool for the  
4 Beninese population. The result suggests that the TQSI tool might be useful for resource-poor  
5  
6 settings to screen out moderate to severe delay in motor function.  
7  
8  
9

#### 10 11 *Trivandrum Developmental Screening Chart (TDSC)*

12  
13 The TDSC was designed and developed by Nair and colleagues in 1991 in Child Development  
14 Center, Kerala, India. The chart contains 17 items under four developmental domains- mental,  
15  
16 motor, vision and hearing; applicable for children under two years of age.[50] If a child fails  
17  
18 to achieve any item appropriate for his chronological age, considered as screened positive. In  
19  
20 a study conducted by Nair et al. 1991; TDSC was validated against Denver Developmental  
21  
22 Screening Test (DDST) simultaneously in community as well as hospital settings in a cluster  
23  
24 random sample of 1945 Indian children aged less than two years. Overall sensitivity and  
25  
26 specificity of TDSC found to be 66.7% and 78.8%, respectively.[50] The authors  
27  
28 recommended to utilize the chart for mass screening of developmental delay among under-2  
29  
30 children in resource poor settings.  
31  
32  
33  
34  
35  
36  
37  
38

#### 39 *Woodside Screening Technique (WSST)*

40  
41 The WSST was designed and developed in Glasgow, Scotland in the year 1976. The tool  
42  
43 consists of 70 items covering social, hearing and language, vision and fine motor, and gross  
44  
45 motor domains, suitable for children under 4 years of age.[51] In a study conducted by Gupta  
46  
47 and Patel, 1991; WSST was validated against Gesell's Developmental Schedules (GDS) in a  
48  
49 random sample of 619 children aged 6 weeks-2 years from Jabalpur, India. Overall sensitivity  
50  
51 and specificity of WSST found to be 83% and 88%, respectively.[51]  
52  
53  
54  
55  
56

57 The major findings of this systematic review are presented in Table 2. We have classified the  
58  
59 eligible tools into two broad categories- "Parents/ Caregiver Reported Tools" and "Direct Child  
60

1  
2  
3 Testing/ Observation Tools”. The tools/ studies which were not included in this review as they  
4  
5 failed to meet the selection criteria were enlisted along with the reasons for rejection in  
6  
7  
8 Supplementary Table S4.  
9  
10  
11  
12  
13  
14  
15  
16  
17  
18  
19  
20  
21  
22  
23  
24  
25  
26  
27  
28  
29  
30  
31  
32  
33  
34  
35  
36  
37  
38  
39  
40  
41  
42  
43  
44  
45  
46  
47  
48  
49  
50  
51  
52  
53  
54  
55  
56  
57  
58  
59  
60

For peer review only

**Table 2:** Major findings from the selected studies used in this review

| Parents/ Caregiver Reported Tools |                                  |                                                          |                                                                                                  |                                                            |                                                                                          |                          |                                          |
|-----------------------------------|----------------------------------|----------------------------------------------------------|--------------------------------------------------------------------------------------------------|------------------------------------------------------------|------------------------------------------------------------------------------------------|--------------------------|------------------------------------------|
| <i>General Screening Tools</i>    |                                  |                                                          |                                                                                                  |                                                            |                                                                                          |                          |                                          |
| Ref.                              | Country                          | Screening Tool                                           | Gold Standard                                                                                    | Study                                                      | Participants                                                                             | Key Findings             |                                          |
| [34]                              | India<br>Lower-Middle- Income    | Ages and Stages Questionnaire (ASQ-II)                   | Developmental Assessment Scales for Indian Infants (DASII)                                       | <b>Design</b> Cross-Sectional<br><b>Setting</b> Hospital   | <b>Sample</b> - 200<br><b>Age</b> – 4, 10, 18 and 24 months<br><b>Convenience sample</b> | Overall                  | Sensitivity 83.3%<br>Specificity 75.4%   |
| [35]                              | China<br>Upper-Middle- Income    | Ages and Stages Questionnaire (ASQ-III)                  | Bayley Scales of Infant Development (BSID-III)                                                   | <b>Design</b> Cross-Sectional<br><b>Setting</b> Community  | <b>Sample</b> – 1831<br><b>Age</b> – 5-24 months<br><b>Cluster random sample</b>         | Overall                  | Sensitivity 76.52%<br>Specificity 40.97% |
| [38]                              | Turkey<br>Upper-Middle- Income   | Guide for Monitoring Child Development (GMCD)            | Bayley Scales of Infant Development (Bayley-II)                                                  | <b>Design</b> Cross-Sectional<br><b>Setting</b> - Hospital | <b>Sample</b> – 79<br><b>Age</b> – 1-24 months<br><b>Random sample</b>                   | Overall                  | Sensitivity 88%<br>Specificity 93%       |
| [42]                              | India<br>Lower-Middle- Income    | Lucknow Development Screen (LDS)                         | Developmental Assessment Scales for Indian Infants (DASII)<br><br>Vineland Social Maturity Scale | <b>Design</b> Cross-Sectional<br><b>Setting</b> Hospital   | <b>Sample</b> - 142<br><b>Age</b> - 6-24 months<br><b>Convenience sample</b>             | Overall                  | Sensitivity 95.9%<br>Specificity 73.1%   |
| [44]                              | India<br>Lower-Middle- Income    | New Delhi – Development Screening Questionnaire (ND-DSQ) | Developmental Assessment Scales for Indian Infants (DASII)                                       | <b>Design</b> Cross-Sectional<br><b>Setting</b> Hospital   | <b>Sample</b> - 200<br><b>Age</b> – 9 and 18 months<br><b>Convenience sample</b>         | 9-months                 | Sensitivity 100%<br>Specificity 87.2%    |
|                                   |                                  |                                                          |                                                                                                  |                                                            |                                                                                          | 18-months                | Sensitivity 91.4%<br>Specificity 88.7%   |
| [45]                              | Thailand<br>Upper-Middle- Income | Parent Evaluation of Developmental Status (PEDS)         | Parent Evaluation of Developmental Status: Developmental Milestones, Assessment Level            | <b>Design</b> Cross-Sectional<br><b>Setting</b> Hospital   | <b>Sample</b> - 266<br><b>Age</b> – 9, 18 and 30 months<br><b>Convenience sample</b>     | ≥ 1 significant concern  | Sensitivity 67.7%<br>Specificity 60.7%   |
|                                   |                                  |                                                          |                                                                                                  |                                                            |                                                                                          | ≥ 2 significant concerns | Sensitivity 27.7%<br>Specificity 93.0%   |
| [46]                              | Thailand<br>Upper-Middle- Income | Parent Evaluation of Developmental Status (PEDS- Thai)   | Mullen Scales of Early Learning                                                                  | <b>Design</b> Cross-Sectional<br><b>Setting</b> Hospital   | <b>Sample</b> - 137<br><b>Age</b> – 18-30 months<br><b>Convenience sample</b>            | Overall                  | Sensitivity 92.8%<br>Specificity 49.2%   |
| [49]                              | Benin<br>Lower-Middle- Income    | Ten Questions Screening Instrument (TQSI)                | Mullen Scales of Early Learning                                                                  | <b>Design</b> Cross-Sectional<br><b>Setting</b>            | <b>Sample</b> - 357<br><b>Age</b> – 12 months                                            | Motor                    | Sensitivity 76.5%<br>Specificity 75.7%   |
|                                   |                                  |                                                          |                                                                                                  |                                                            |                                                                                          | Overall                  | Sensitivity 81%                          |



|                                                |                                             |                                                                        |                                                                                                                         |                                                                                              |                                                                                                      |                                             |                                                                                |
|------------------------------------------------|---------------------------------------------|------------------------------------------------------------------------|-------------------------------------------------------------------------------------------------------------------------|----------------------------------------------------------------------------------------------|------------------------------------------------------------------------------------------------------|---------------------------------------------|--------------------------------------------------------------------------------|
|                                                |                                             |                                                                        |                                                                                                                         | Screening- Household<br>Assessment- Health Centre                                            | <b>Random sample</b>                                                                                 |                                             | Specificity 31%                                                                |
| <i>Motor Screening Tools</i>                   |                                             |                                                                        |                                                                                                                         |                                                                                              |                                                                                                      |                                             |                                                                                |
| <b>Ref.</b>                                    | <b>Country</b>                              | <b>Screening Tool</b>                                                  | <b>Gold Standard</b>                                                                                                    | <b>Study</b>                                                                                 | <b>Participants</b>                                                                                  | <b>Key Findings</b>                         |                                                                                |
| [41]                                           | <b>South Africa</b><br>Upper-Middle- Income | Little Developmental Coordination Disorder Questionnaire (Little DCDQ) | Movement Assessment Battery for Children -2                                                                             | <b>Design</b> – Cross-sectional<br><b>Setting</b> – nursery schools                          | <b>Sample</b> – 53<br><b>Age</b> – 3-5 years<br><b>Convenience sample</b>                            | Overall                                     | Sensitivity 57.14%<br>Specificity 81.25%                                       |
| <b>Direct Child Testing/ Observation Tools</b> |                                             |                                                                        |                                                                                                                         |                                                                                              |                                                                                                      |                                             |                                                                                |
| <i>General Screening Tools</i>                 |                                             |                                                                        |                                                                                                                         |                                                                                              |                                                                                                      |                                             |                                                                                |
| <b>Ref.</b>                                    | <b>Country</b>                              | <b>Screening Tool</b>                                                  | <b>Gold Standard</b>                                                                                                    | <b>Study</b>                                                                                 | <b>Participants</b>                                                                                  | <b>Key Findings</b>                         |                                                                                |
| [37]                                           | <b>Bangladesh</b><br>Lower-Middle- Income   | Development Screening Questionnaire (DSQ)                              | Rapid Neurodevelopmental Assessment (RNDA)                                                                              | <b>Design</b> Cross-Sectional<br><b>Setting</b> Screening- Household<br>Assessment- Hospital | <b>Sample</b> – 197<br><b>Age</b> - 0-2 years<br><b>Random sample</b>                                | Overall                                     | Sensitivity 47.1%<br>Specificity 97.2%                                         |
| [43]                                           | <b>Mongolia</b><br>Lower-Middle- Income     | Mongolian Rapid Baby Scale (MORBAS)                                    | Bayley Scales of Infant and Toddler Development-III                                                                     | <b>Design</b> Cross-Sectional<br><b>Setting</b> Hospital                                     | <b>Sample</b> - 150<br><b>Age</b> – 0 month 16 days – 42 months 15 days<br><b>Convenience sample</b> | Overall                                     | Sensitivity 81.8%<br>Specificity 52.3%                                         |
| [47]                                           | <b>India</b><br>Lower-Middle- Income        | Revised Prescreening Denver Questionnaire (R-PDQ)                      | Denver Developmental Screening Test (DDST)                                                                              | <b>Design</b> Cross-Sectional<br><b>Setting</b> Community                                    | <b>Sample</b> - 126<br><b>Age</b> – 2-4 years<br><b>Cluster random sample</b>                        | Delay in ≥ 1 domain<br>Delay in ≥ 2 domains | Sensitivity 100%<br>Specificity 7.8%<br>Sensitivity 18.2%<br>Specificity 42.6% |
| [48]                                           | <b>South Africa</b><br>Upper-Middle- Income | Road to Health Booklet Developmental Checklist (RTHB-DC)               | Parent Evaluation of Developmental Status (PEDS)<br>Parent Evaluation of Developmental Status: Developmental Milestones | <b>Design</b> Comparative Cross-sectional within-subject<br><b>Setting</b> PHC clinics       | <b>Sample</b> - 201<br><b>Age</b> – 6-12 months<br><b>Convenience sample</b>                         | Overall                                     | Sensitivity 25%<br>Specificity 91%                                             |
| [50]                                           | <b>India</b><br>Lower-Middle- Income        | Trivandrum Developmental Screening Chart (TDSC)                        | Denver Developmental Screening Test (DDST)                                                                              | <b>Design</b> Cross-Sectional<br><b>Setting</b> – Hospital + Community                       | <b>Sample</b> – 1945<br><b>Age</b> – 0-2 years<br><b>Cluster random sample</b>                       | Overall                                     | Sensitivity 66.7%<br>Specificity 78.8%                                         |
| [51]                                           | <b>India</b>                                | Woodside Screening Technique (WSST)                                    | Gesell’s Developmental Schedules (GDS)                                                                                  | <b>Design</b> Cross-Sectional                                                                | <b>Sample</b> – 619                                                                                  | Overall                                     | Sensitivity 83%<br>Specificity 88%                                             |

|                                 | Lower-Middle- Income                  |                                                               |                                                   | <b>Setting</b> – Community                                  | <b>Age</b> – 6 weeks-2 years                                                  |                     |                                         |
|---------------------------------|---------------------------------------|---------------------------------------------------------------|---------------------------------------------------|-------------------------------------------------------------|-------------------------------------------------------------------------------|---------------------|-----------------------------------------|
|                                 |                                       |                                                               |                                                   |                                                             | <b>Random sample</b>                                                          |                     |                                         |
| <i>Motor Screening Tools</i>    |                                       |                                                               |                                                   |                                                             |                                                                               |                     |                                         |
| <b>Ref.</b>                     | <b>Country</b>                        | <b>Screening Tool</b>                                         | <b>Gold Standard</b>                              | <b>Study</b>                                                | <b>Participants</b>                                                           | <b>Key Findings</b> |                                         |
| [39]                            | <b>Iran</b><br>Upper-Middle- Income   | Infant Neurological International Battery (INFANIB)           | Developmental Assessment by Pediatric Neurologist | <b>Design</b> – Cross-Sectional<br><b>Setting</b> Hospital  | <b>Sample</b> – 153<br><b>Age</b> – 4-18 months<br><b>Random sample</b>       | Overall             | Sensitivity 90%<br>Specificity 83%      |
| <i>Language Screening Tools</i> |                                       |                                                               |                                                   |                                                             |                                                                               |                     |                                         |
| <b>Ref.</b>                     | <b>Country</b>                        | <b>Screening Tool</b>                                         | <b>Gold Standard</b>                              | <b>Study</b>                                                | <b>Participants</b>                                                           | <b>Key Findings</b> |                                         |
| [36]                            | <b>Brazil</b><br>Upper-Middle- Income | American Speech-Language and Hearing Association (ASHA)       | ABFW test                                         | <b>Design</b> Cross-Sectional<br><b>Setting</b> - Community | <b>Sample</b> – 1000<br><b>Age</b> – 0-5 years<br><b>Random sample</b>        | Overall             | Sensitivity 82.5%<br>Specificity 98.93% |
| [40]                            | <b>India</b><br>Lower-Middle- Income  | Language Evaluation Scale Trivandrum for 0-3 years (LEST 0-3) | Receptive Expressive Emergent Language Scale      | <b>Design</b> Cross-Sectional<br><b>Setting</b> - Community | <b>Sample</b> – 643<br><b>Age</b> – 0-3 years<br><b>Cluster random sample</b> | One item delay      | Sensitivity 95.8%<br>Specificity 77.5%  |
|                                 |                                       |                                                               |                                                   |                                                             |                                                                               | Two item delay      | Sensitivity 66.7%<br>Specificity 94.8%  |

## Discussion

To the best of our knowledge, this is the first systematic review which attempts to find the available screening tools for early identification of children with developmental delay in LMICs. Although some systematic reviews were found who considered developmental assessment tools requiring professional experts with a special office setup,[60] screening neurodevelopmental disability irrespective of age limit and diagnosis (e.g. Developmental Delay, Global Developmental Delay, Cerebral Palsy, Autism Spectrum Disorder, Attention Deficit Hyperactivity Disorder, Epilepsy, etc.),[61] or reflected high-income country context.[8] We have also observed a study in which both screening and assessment tools have been systematically rated for accuracy and feasibility to use in LMICs.[28] Where, information was significantly dependent to World Bank's toolkit and inventory on early child development tools,[62] rather than being obtained from systematic search through databases. In contrast, the purpose of this review was to systematically look for the available studies where screening tools were used exclusively for early identification (limited to children under 5 years of age) of developmental delay in the LMICs region where all types of study settings (i.e. from household to health facilities) were addressed in order to go for early intervention and rehabilitation of the screened cases. Therefore, the unique contribution of this review is to be able to report those screening tools exclusively designed for screening of developmental delay at the earliest possible time in both single and multiple domains.

### *Research gaps and future directions*

Several research gaps have been identified in the reported studies. Primarily, there was a lack of standard terminologies to indicate the developmental domains. The examples of synonymous domain names are as follows: (i) **cognitive**: cognition, cognitive, global, mental, problem solving, etc.;[34, 35, 37, 42, 43, 45, 46, 49, 50] (ii) **language**: communication,

1  
2  
3 expressive communication, expressive language, language, receptive communication,  
4 receptive language, speech, speech and language, etc.;[34- 38, 40, 42, 43, 45-48] (iii) **psycho-**  
5  
6 **social:** adaptive behavior, behavior, personal-social, self-help, social, social-emotional,  
7  
8 socialization, etc.[34, 35, 37, 38, 42, 43, 45-47, 51] Apart from those, few researchers  
9  
10 incorporated unconventional developmental domains in their tools, such as: hearing, school,  
11  
12 seizure, vision, etc.[45, 46, 48-51] Secondly, there was a lack of standard proxy measures to  
13  
14 define the screen-positive cases. Currently available examples of proxy measures are as  
15  
16 follows: overall scores,[34, 35], number of negative answers,[36] number of milestones,[38]  
17  
18 number of items,[40, 50] number of functional domains,[47] number of significant  
19  
20 concerns[45, 46] etc. These two factors together, often make the screening results  
21  
22 incomprehensible to health professionals who are not familiar with the tool in question.  
23  
24 Moreover, it is neither possible to convert nor compare the test scores between separate  
25  
26 screening tools, for better understanding. Many of the tools developed in English speaking  
27  
28 countries might not be suitable for non-English speaking countries due to different socio-  
29  
30 cultural backgrounds and problematic translation.[63-65] These issues might become a barrier  
31  
32 for early identification and rehabilitation of developmental delay from the service providers'  
33  
34 end. Lastly, several studies reported that the expected sensitivity-specificity was not achieved  
35  
36 due to the lack of validated gold standard assessment tool for the particular culture in  
37  
38 question.[40, 47, 49] To the best of our knowledge, there is a lack of WHO's centralized  
39  
40 initiatives, as well as no Global regulatory body is currently working in this regard. Majority  
41  
42 of the developmental assessment tools found in this review were established for high income  
43  
44 countries (BSID, DDST, REELS, GDS, MABC-2, etc). Only three of them were designed and  
45  
46 developed in LMICs (ABFW, DAASII and RNDA). None of the studies using assessment tools  
47  
48 designed for high income counties, provided information on cultural adaptation. However, in  
49  
50 a study conducted by Parveen et al., 2014, took the initiative to culturally adapt Bayley Scales  
51  
52  
53  
54  
55  
56  
57  
58  
59  
60

1  
2  
3 of Infant Development- Second Edition (BSID-II) items for Bangladeshi infants.[66] Example  
4 of culture-sensitive BSID-II items for Bangladeshi infants are presented in Supplementary  
5 Table S5. Future research work should focus on developing or adapting developmental  
6 assessment tools to be efficiently used as gold standard for LMICs.  
7  
8  
9  
10  
11  
12  
13  
14

15 In this systematic review, we had observed East Asian and Pacific, European and  
16 Central Asian, Latin American and the Caribbean, Middle East and North African, South Asian  
17 and Sub-Saharan cultural contexts among the eligible studies. Although, the number of  
18 countries engaged in similar studies are alarmingly low compared to the number of LMICs, in  
19 total.[32] This reveals the urgent need for valid and culturally sensitive screening tools for the  
20 rest of the LMICs. Among the sixteen eligible screening tools, half of them were developed in  
21 LMICs (DSQ, GMCD, LEST 0-3, LDS, MORBAS, ND-DSQ, RTHB-DC and TDSC) and  
22 another half were developed in high-income countries (ASHA, ASQ, INFANIB, Little DCDQ,  
23 PEDS, R-PDQ, TQSI and WSST). We have found the majority of the culturally sensitive tools  
24 translated in their native language. Still, for multilingual countries like Benin, Ethiopia, India,  
25 etc. the necessity of translating the tools in regional languages, remains high. None of the  
26 LMICs has been found to be engaged in collecting nationally representative longitudinal data  
27 on the prevalence of developmental delay, which is vital for disease projection. The gathering  
28 of nationally representative prevalence data in linguistic, social, ethnic and cultural subgroups  
29 would allow the validation of customized developmental screening tools according to disease  
30 burden. Greater customization to respect the diverse cultural norms[67] of a particular  
31 community, will also most likely result in greater acceptance[68, 69] of the screening process,  
32 which is crucial for the success of a large-scale surveillance program.  
33  
34  
35  
36  
37  
38  
39  
40  
41  
42  
43  
44  
45  
46  
47  
48  
49  
50  
51  
52  
53  
54  
55  
56  
57  
58  
59  
60

1  
2  
3 While planning surveillance program for resource-poor settings, additional factors  
4 should be kept in mind. According to Gupta et al 1991, lack of furniture as well as staircase at  
5 home often results in exhibition of delayed gross motor skills due to lack of practice. Similarly,  
6 being heavily dependant on recall method is also problematic, as it is burdensome for parents  
7 with no or minimal education.[51] To overcome these issues, Ertem et al 2008 suggested to  
8 target very young children for developmental screening/ surveillance. As, earlier we can screen  
9 the children, higher the chances of attaining similar milestones at similar ages despite of  
10 cultural differences.[38]

### ***Promising quasi-validated tool***

24  
25  
26 We have found quite a few promising screening tools suitable for early identification of  
27 developmental delay. Unfortunately, could not include them as the studies didn't fulfil our  
28 selection criteria. One of the quasi-validated tools is Neonatal Oral Motor Assessment Scale  
29 (NOMAS). NOMAS is a commonly used neonatal feeding evaluation which is developed by  
30 Marjorie Meyer Palmer in 1985. The NOMAS is the only available neonatal feeding evaluation  
31 that can be used for the term or preterm infants and for breast or bottle-fed infants. This is a  
32 28-items observational checklist for tongue and jaw movement. Following the observation of  
33 non-nutritive sucking, oral feeding for the first 2 minutes are evaluated.[70] In a study  
34 conducted in Taiwan by Tsai et al., 2010, the predictive validity of NOMAS was assessed  
35 against BSID- II in a group of 27 preterm infants without brain lesion to demonstrate  
36 neurodevelopmental outcome at 6 months and 12 months of corrected age.[71]

### ***Suitable screening tools for primary health care setting***

56 Out of the ten screening tools, we would recommend two screening tools feasible enough to be  
57 used for developmental surveillance at the primary health care setting. They are ASQ and  
58  
59  
60

1  
2  
3 PEDS. Both are parent-completed screening tools. Their strong points are: PEDS requires bare  
4 minimum additional materials and for ASQ, it provides 21 sets of questionnaires for 21 age  
5 groups. Besides, both are very easy to administer. We can easily build up a surveillance system  
6 using these tools. Where health workers can carry out screening at households using single  
7 PEDS questionnaire for all, then screened positive cases can be referred to the primary health  
8 care centres to conduct secondary screening with age specific ASQ questionnaire. Basic  
9 properties of ASQ and PEDS are stated in the Supplementary Table S6. (adopted from [72])  
10  
11  
12  
13  
14  
15  
16  
17  
18  
19  
20

### 21 ***Limitations***

22  
23  
24 Despite our best efforts, there were several limitations to this study. This study was limited to  
25 articles published in the English language only due to constraints in resources and time. In this  
26 study, we could neither address developmentally delayed children due to HIV exposure nor  
27 due to autism spectrum disorder or other behavioural disorders. Though these two groups of  
28 children also suffer from varying degree of developmental delay, the pathogenesis behind those  
29 delays is closely related to the diseases themselves.[73, 74] Moreover, conventionally it takes  
30 more than two years of age to diagnose a child with autism spectrum disorder and hence the  
31 age range of currently available autism screening tools starts later than general developmental  
32 screening tools (e.g. Modified Checklist for Autism in Toddlers; 16-30 months; where ASQ-  
33 3: 1-66 months). This conflicts with the objectives of our study to ensure early diagnosis of  
34 developmental delay. So, with respect to other neurodevelopmental disorders, we preferred to  
35 focus exclusively on developmental delay in our study. Though it is very difficult to rule out  
36 the possibility of undiagnosed cases of autism being included among all the developmentally  
37 delayed children, as none of the studies reported so. Moreover, we were unable to critically  
38 appraise the available screening tools in terms of diagnostic accuracy due to the unavailability  
39 of the necessary information. Which is quite reasonable as Boggs and her colleagues also  
40  
41  
42  
43  
44  
45  
46  
47  
48  
49  
50  
51  
52  
53  
54  
55  
56  
57  
58  
59  
60

1  
2  
3 reported that authors tend to provide validity information very briefly and evidence on accuracy  
4 are most difficult to obtain.[28] We are hopeful to conduct subsequent systematic review and  
5  
6 meta-analysis on geographical region/ country/ domain specific screening tools and their  
7  
8 psychometric properties based on the information obtained from this study.  
9  
10  
11  
12  
13

### 14 ***Recommendations***

- 15  
16  
17 (1) A global regulatory body should be formed to standardize the terminologies and cut-  
18  
19 off scores of available and future screening tools to improve comprehensiveness and  
20  
21 interpretation of test results, simultaneously ensuring better correlation between results  
22  
23 obtained from different screening tools.  
24  
25  
26  
27 (2) Future research work should focus on revising existing screening as well as assessment  
28  
29 tools in different ethnic and cultural perspectives and validate them in the respective  
30  
31 normative sample as well as conducting systematic reviews based on individual  
32  
33 screening tools in different cultural settings.  
34  
35  
36 (3) We also recommend ensuring nationwide routine developmental surveillance  
37  
38 programs in LMICs using culturally sensitive tools to identify and treat developmental  
39  
40 delay as early as possible. Developmental screening at the time of routine  
41  
42 immunization schedule could be a possible way to integrate this with an existing  
43  
44 successful public health program in LMICs. This timing would be both cost-effective  
45  
46 and maximize response rates.  
47  
48  
49  
50  
51

### 52 ***Conclusions***

53  
54 Developmental screening is required for early diagnosis of developmental delays in infants and  
55  
56 young children in LMICs to enable early intervention and rehabilitation. In order to do this,  
57  
58 culturally-sensitive, easy to administer screening tools with good psychometric properties are  
59  
60



1  
2  
3 needed. We observed that there is a lack of culturally sensitive developmental screening tools  
4 validated among under 5 children in LMICs. However, we have found eight screening tools  
5 with relatively high sensitivity and specificity. We also identified key research gaps and  
6 consequently proposed a few recommendations for overcoming those gaps. These include (but  
7 not limited to) global standardization of terminologies and cut-off scores for screening tools,  
8 revising existing tools according to diverse cultural norms and validating them in the respective  
9 normative sample and finally ensuring nationwide routine developmental surveillance  
10 programs in LMICs using culturally sensitive tools. To execute so, we have suggested a health  
11 worker centred screening system consisting ASQ and PEDS. Therefore, future research should  
12 focus on enabling the caregivers, health workers, and therapists to assist in children with  
13 developmental delays in LMICs to reach their full developmental potential.  
14  
15  
16  
17  
18  
19  
20  
21  
22  
23  
24  
25  
26  
27  
28  
29  
30

31 **Declaration of interest:** This manuscript is new and entirely original, has not been  
32 copyrighted, published, submitted, or accepted for publication elsewhere. All authors have  
33 given their consent and agreed to submit to your journal. The authors have no conflict of  
34 interest.  
35

36  
37 **Acknowledgments:** The authors acknowledge the wise feedback and invaluable suggestions  
38 received from Prof. Dr. M. Shafiqur Rahman, Institute of Statistical Research and Training,  
39 University of Dhaka and Prof. Dr. Naila Zaman Khan, Department of Paediatric Neuroscience,  
40 Dhaka Shishu (Children's) Hospital, Bangladesh Institute of Child Health.  
41  
42  
43

44 **Author Statement:** This study was conceived and designed by GK and TF. CK developed the  
45 search strategy. Three authors conducted the database search (phase 1 up to March 2018: CK;  
46 phase 2 up to July 2020: IJ and MKI). Two authors (TF and IJ) independently screened the  
47 title and abstracts. TF, MKI and GK independently performed the full-text review of the  
48 screened articles. During each step of the study selection process, disagreements were resolved  
49 through discussion. TF and MKI wrote the first draft with input from GK and KB. All authors  
50 reviewed all drafts and approved the final submitted manuscript.  
51  
52  
53

54 **Funding:** This project was not externally funded. Study activities were supported by the Asian  
55 Institute of Disability and Development (AIDD), University of South Asia, Bangladesh.  
56  
57

58 **Competing interests:** The authors have no conflict of interest.  
59  
60

**Patient consent for publication:** Not required.

**Ethics approval:** As this systematic review did not directly involve human or animal subjects, or access to medical records; ethical approval was not required.

**Provenance and peer review:** Not commissioned; externally peer reviewed.

**Data sharing statement:** No original data were generated for this study.

**Open access:** This is an open access article distributed in accordance with the Creative Commons Attribution Non Commercial (CC BY-NC 4.0) license, which permits others to distribute, remix, adapt, build upon this work non-commercially, and license their derivative works on different terms, provided the original work is properly cited, appropriate credit is given, any changes made indicated, and the use is non-commercial. See: <http://creativecommons.org/licenses/by-nc/4.0/>.

## References

1. Developmental delay [Internet]. Med.umich.edu. 2010 [cited 5 July 2018]. Available from: <http://www.med.umich.edu/yourchild/topics/devdel.htm>.
2. International classification of functioning, disability and health. Geneva: *World Health Organization*; 2001.
3. Fernald L, Kariger P, Engle P et al. Examining early child development in low-income countries: a toolkit for the assessment of children in the first five years of life [Internet]. *The World Bank*; 2009 [cited 1 January 2019]. Available from: <https://openknowledge.worldbank.org/bitstream/handle/10986/28107/NonAsciiFileName0.pdf?sequence=1>.
4. Walker S, Wachs T, Meeks Gardner J et al. Child development: risk factors for adverse outcomes in developing countries. *The Lancet*. 2007;369:145-157.
5. Early childhood development and disability: a discussion paper [Internet]. Apps.who.int. 2012 [cited 13 February 2019]. Available from: [https://apps.who.int/iris/bitstream/handle/10665/75355/9789241504065\\_eng.pdf;sequence=1](https://apps.who.int/iris/bitstream/handle/10665/75355/9789241504065_eng.pdf;sequence=1).
6. What is a developmental delay? [Internet]. *House with No Steps*. 2018 [cited 15 May 2019]. Available from: <https://www.hwns.com.au/disability-services/childrens-services/early-childhood-intervention/what-is-a-developmental-delay-or-disability/>.
7. About developmental disabilities [Internet]. Institute of Community Integration, University of Minnesota. 2019 [cited 15 May 2019]. Available from: <https://ici.umn.edu/welcome/definition.html>.
8. Warren R, Kenny M, Bennett T et al. Screening for developmental delay among children aged 1-4 years: a systematic review. *CMAJ Open*. 2016;4:E20-E27.
9. Sim F, Thompson L, Marryat L et al. Predictive validity of preschool screening tools for language and behavioural difficulties: A PRISMA systematic review. *PLOS ONE* 2019;14:e0211409.
10. Sices L. Developmental screening in primary care: the effectiveness of current practice and recommendations for improvement [Internet]. 2007 [cited 15 May 2018]. Available from: <https://core.ac.uk/download/pdf/71350769.pdf>.
11. Newborn death and illness [Internet]. WHO. 2011 [cited 5 July 2018]. Available from: [https://www.who.int/pmnch/media/press\\_materials/fs/fs\\_newborndeath\\_illness/en](https://www.who.int/pmnch/media/press_materials/fs/fs_newborndeath_illness/en).
12. Neonatal mortality - UNICEF Data [Internet]. *UNICEF Data*. 2018 [cited 10 July 2018]. Available from: <https://data.unicef.org/topic/child-survival/neonatal-mortality/>.

13. Mathers C, Loncar D. Projections of global mortality and burden of disease from 2002 to 2030. *PLoS Medicine*. 2006;3:e442.
14. Grantham-McGregor S, Cheung Y, Cueto S et al. Developmental potential in the first 5 years for children in developing countries. *The Lancet*. 2007;369:60-70. .
15. Hasan A, Leslie R, Nakajima N. How community-based early childhood programs can impact child development [Internet]. *World Bank Blogs*. 2017 [cited 10 July 2018]. Available from: <http://blogs.worldbank.org/education/how-community-based-early-childhood-programs-can-impact-child-development>.
16. Scherzer A, Chhagan M, Kauchali S et al. Global perspective on early diagnosis and intervention for children with developmental delays and disabilities. *Dev Med Child Neurol*. 2012;54:1079-1084.
17. Ofek-Shlomai N, Berger I. Inflammatory injury to the neonatal brain- what can we do?. *Front Pediatr*. 2014;2.
18. Lin C, Muo C, Chang Y et al. Change in prevalence status for children with developmental delay in Taiwan: a nationwide population-based retrospective study. *Neuropsychiatr Dis Treat*. 2015;11:1541-1547.
19. Wang S, Hsu S, Chen L. The impact on neonatal mortality of shifting childbirth services among levels of hospitals: Taiwan's experience. *BMC Health Serv Res*. 2009;9:94.
20. Sabanathan S, Wills B, Gladstone M. Child development assessment tools in low-income and middle-income countries: how can we use them more appropriately?. *Arch Dis Child*. 2015;100:482-488.
21. Glascoe F, Cairney J. Best practices in test construction for developmental-behavioral measures: quality standards for reviewers and researchers. Follow-Up for NICU Graduates. *Springer*; 2018. p. 255-279.
22. Fischer V, Servili C, Morris J et al. Developmental screening tools: feasibility of use at primary health level in low and middle-income settings. *Neuropsychiatr Enfance Adolesc*. 2012;60:S304.
23. Scherzer A. Experience in cambodia with the use of a culturally relevant developmental milestone chart for children in low- and middle-income countries. *J Policy Pract Intellect Disabil*. 2009;6:287-292.
24. Soltani S, Takian A, Sari A et al. Cultural barriers in access to healthcare services for people with disability in Iran: A qualitative study. *Med. j. Islam. Repub. Iran*. 2017;31:293-299. .
25. Baker D, Miller E, Dang M et al. Developing culturally responsive approaches with southeast asian american families experiencing developmental disabilities. *Pediatrics*. 2010;126:S146-S150. .
26. Baxter C, Mahoney W. Developmental Disability Across Cultures [Internet]. Caring for kids new to canada. 2018 [cited 15 May 2019]. Available from: <https://www.kidsnewtocanada.ca/mental-health/developmental-disability/>.
27. Gladstone M, Lancaster G, Jones A et al. Can western developmental screening tools be modified for use in a rural Malawian setting?. *Arch Dis Child*. 2008;93:23-29.
28. Boggs D, Milner K, Chandna J et al. Rating early child development outcome measurement tools for routine health programme use. *Arch Dis Child*. 2019;104:S22-S33.
29. Marlow M, Servili C, Tomlinson M. A review of screening tools for the identification of autism spectrum disorders and developmental delay in infants and young children: recommendations for use in low- and middle-income countries. *Autism Res* 2019;12:176-199.
30. Richards M, Mossey J, Robins D. Parents' Concerns as They Relate to Their Child's Development and Later Diagnosis of Autism Spectrum Disorder. *J Dev Behav Pediatr* 2016;37:532-540.
31. New World Bank country classifications by income level: 2020-2021. World Bank Blogs. 2020.<https://blogs.worldbank.org/opendata/new-world-bank-country-classifications-income-level-2020-2021> (accessed 13 Jul 2020).
32. World Bank Country and Lending Groups – World Bank Data Help Desk. Datahelpdesk.worldbank.org. 2020.<https://datahelpdesk.worldbank.org/knowledgebase/articles/906519-world-bank-country-and-lending-groups> (accessed 13 Jul 2020).
33. Moher D, Liberati A, Tetzlaff J et al. Preferred reporting items for systematic reviews and meta-analyses: The PRISMA Statement. *Ann Intern Med*. 2009;151:264-269
34. Juneja M, Mohanty M, Jain R et al. Ages and stages questionnaire as a screening tool for developmental delay in Indian children. *Indian Pediatr*. 2011;49:457-461. .

35. Yue A, Jiang Q, Wang B et al. Concurrent validity of the Ages and Stages Questionnaire and the Bayley Scales of Infant Development III in China. *PLOS ONE* 2019;14:e0221675.
36. Dias D, Rondon-Melo S, Molini-Avejonas D. Sensitivity and specificity of a low-cost screening protocol for identifying children at risk for language disorders. *Clinics* 2020;75.
37. Khan N, Muslima H, Shilpi A et al. Validation of a home-based neurodevelopmental screening tool for under 2-year-old children in Bangladesh. *Child Care Health Dev.* 2012;39:643-650
38. Ertem I, Dogan D, Gok C et al. A Guide for Monitoring Child Development in Low- and Middle-Income Countries. *Pediatrics* 2008;121:e581-e589.
39. Soleimani F, Dadkhah A. Validity and reliability of infant neurological international battery for detection of gross motor developmental delay in Iran. *Child Care Health Dev.* 2007;33:262-265. .
40. Nair M, Harikumar Nair G, Mini A et al. Development and validation of language evaluation scale trivandrum for children aged 0–3 years — LEST (0–3). *Indian Pediatr.* 2013;50:463-467.
41. Venter A, Pienaar A, Coetzee D. Suitability of the ‘Little DCDQ’ for the identification of DCD in a selected group of 3–5-year-old South African children. *Early Child Dev Care.* 2015;185:1359-1371.
42. Bhave A, Bhargava R, Kumar R. Development and validation of a new Lucknow development screen for indian children aged 6 months to 2 years. *J Child Neurol.* 2009;25:57-60
43. Dagvadorj A, Takehara K, Bavuasuren B et al. The quick and easy Mongolian rapid baby scale shows good concurrent validity and sensitivity. *Acta Paediatr.* 2015;104:e94-e99
44. Jain R, Arora A, Anand R et al. Designing and validation of a Hindi-language parent self-report developmental screening tool. *Indian Pediatr.* 2017;54:550-555.
45. Chunsuwan I, Hansakunachai T, Pornsamrit S. Parent evaluation of developmental status (PEDS) in screening: The Thai experience. *Int. J. Pediatr.* 2016;58:1277-1283
46. Wantanakorn P, Sawangworachart K, Roongpraiwan R et al. Parents' evaluation of developmental status (PEDS) in screening for developmental delay in Thai children aged 18-30 months. *Indian Pediatr* 2016; 53: 1110–1113.
47. Awasthi S, Pande V. Validation of revised prescreening denver questionnaire in preschool children of urban slums. *Indian Pediatr* 1997; 34: 919-922.
48. Van der Linde J, Swanepoel D, Glascoe F et al. Developmental screening in South Africa: comparing the national developmental checklist to a standardized tool. *Afr Health Sci.* 2015;15:188-196
49. Koura K, Boivin M, Davidson L et al. Usefulness of child development assessments for low-resource settings in francophone Africa. *J Dev Behav Pediatr.* 2013;34:486-493.
50. Nair MK, George B, Philip E et al. Trivandrum Developmental Screening Chart. *Indian Pediatr.* 1991 Aug;28(8):869-72.
51. Gupta R, Patel NV. Trial of a screening technique of the developmental assessment of infants and young children (6 weeks-2 years). *Indian Pediatr.* 1991 Aug 1;28(8):859-67.
52. Singh A, Yeh C, Blanchard S. Ages and stages questionnaire: una escala de evaluación global. *Bol Med Hosp Infant Mex* 2017; 74: 5-12.
53. Squires J, Bricker D. ASQ®-3 - Brookes Publishing Co. [Internet]. Brookes Publishing Co. [cited 10 August 2018]. Available from: <https://brookespublishing.com/product/asq-3/>.
54. Liao W, Wen E, Li C et al. Predicting neurodevelopmental outcomes for at-risk infants: reliability and predictive validity using a Chinese version of the INFANIB at 3, 7 and 10 months. *BMC Pediatr.* 2012;12:27.
55. Glascoe FP. Parents’ evaluation of developmental status (PEDS). *Indian Pediatr* 2003; 40: 439–40.
56. Woolfenden S, Eapen V, Williams K et al. A systematic review of the prevalence of parental concerns measured by the Parents’ Evaluation of Developmental Status (PEDS) indicating developmental risk. *BMC Pediatr.* 2014;14:231. .
57. Plessis L, Koornhof H, Marais M et al. Implementation of the road-to-health-booklet health promotion messages at primary health care facilities, Western Cape Province, South Africa. *SAJCH* 2017; 11: 164-169
58. Krishnamurthy V, Srinivasan R. Childhood disability screening tools : the south east Asian perspective a review for the who office of the south east Asian region. Mumbai. WHO; 2011.

- 1
  - 2
  - 3
  - 4
  - 5
  - 6
  - 7
  - 8
  - 9
  - 10
  - 11
  - 12
  - 13
  - 14
  - 15
  - 16
  - 17
  - 18
  - 19
  - 20
  - 21
  - 22
  - 23
  - 24
  - 25
  - 26
  - 27
  - 28
  - 29
  - 30
  - 31
  - 32
  - 33
  - 34
  - 35
  - 36
  - 37
  - 38
  - 39
  - 40
  - 41
  - 42
  - 43
  - 44
  - 45
  - 46
  - 47
  - 48
  - 49
  - 50
  - 51
  - 52
  - 53
  - 54
  - 55
  - 56
  - 57
  - 58
  - 59
  - 60
59. Landers C, Kagitcibasi C. Measuring the psychosocial development of young children: the innocent technical workshop. Consultative Group on Early Childhood Care Development; 1990
60. Mukherjee S, Aneja S, Krishnamurthy V et al. Incorporating developmental screening and surveillance of young children in office practice. *Indian Pediatr.* 2014;51:627-635. .
61. Maulik P, Darmstadt G. Childhood disability in low- and middle-income countries: overview of screening, prevention, services, legislation, and epidemiology. *Pediatrics.* 2007;120:S1-S55. .
62. Fernald L, Prado E, Kariger P et al. A toolkit for measuring early childhood development in low and middle-income countries. *The World Bank*; 2017
63. Sarmiento Campos J, Squires J, Ponte J. Universal developmental screening: preliminary studies in Galicia, Spain. *Early Child Dev Care.* 2010;181:475-485. .
64. Pomés M, Squires J, Yovanoff P. Psychometric examination of a Spanish translation of a developmental screening instrument. *J Early Child Res.* 2014;14:132-145. .
65. Kiing J, Rajgor D, Toh T. Topical review: mind your language—translation matters (a narrative review of translation challenges). *J. Pediatr. Psychol.* 2016;41:1110-1119. .
66. Parveen M, Rahman S, Islam S et al. Adaptation of items of bayley scales of infant development-II (BSID-II) suitable for Bangladeshi infants. *Dhaka University J. Biol. Sci.* 2014;23:187-195.
67. Revel M. Article 12: Respect for cultural diversity and pluralism. In: ten Have H, Stanton-Jean M, ed. by. The UNESCO universal declaration on bioethics and human rights. *UNESCO Publishing*; 2019. p. 199-209. .
68. Levine R, Levine S, Dixon S et al. Child care and culture. Cambridge: Cambridge University Press; 1994. .
69. Brooks E, Novins D, Noe T et al. Reaching rural communities with culturally appropriate care: a model for adapting remote monitoring to American Indian veterans with posttraumatic stress disorder. *Telemed e-Health.* 2013;19:272-277.
70. Zarem C, Crapnell T, Tiltges L et al. Neonatal Nurses' and Therapists' Perceptions of Positioning for Preterm Infants in the Neonatal Intensive Care Unit. *Neonatal Netw* 2013;32:110-116.
71. Tsai S, Chen C, Lin M. Prediction for developmental delay on Neonatal Oral Motor Assessment Scale in preterm infants without brain lesion. *Int. J. Pediatr.* 2010;52:65-68.
72. Garg P, Ha MT, Eastwood J et al. Health professional perceptions regarding screening tools for developmental surveillance for children in a multicultural part of Sydney, Australia. *BMC Fam Pract.* 2018 Dec 1;19(1):42.
73. Lowry F. Brain chemistry differs in autism vs developmental delay [Internet]. *Medscape.* 2013 [cited 5 July 2018]. Available from: <https://www.medscape.com/viewarticle/808794>.
74. Ngoma MS M. The effect of HIV on developmental milestones in children. *J AIDS Clin Res.* 2015;06:482. .

1  
2  
3  
4  
5  
6  
7  
8  
9  
10  
11  
12  
13  
14  
15  
16  
17  
18  
19  
20  
21  
22  
23  
24  
25  
26  
27  
28  
29  
30  
31  
32  
33  
34  
35  
36  
37  
38  
39  
40  
41  
42  
43  
44  
45  
46  
47  
48  
49  
50  
51  
52  
53  
54  
55  
56  
57  
58  
59  
60

For peer review only

**Figure 1:** PRISMA flow diagram



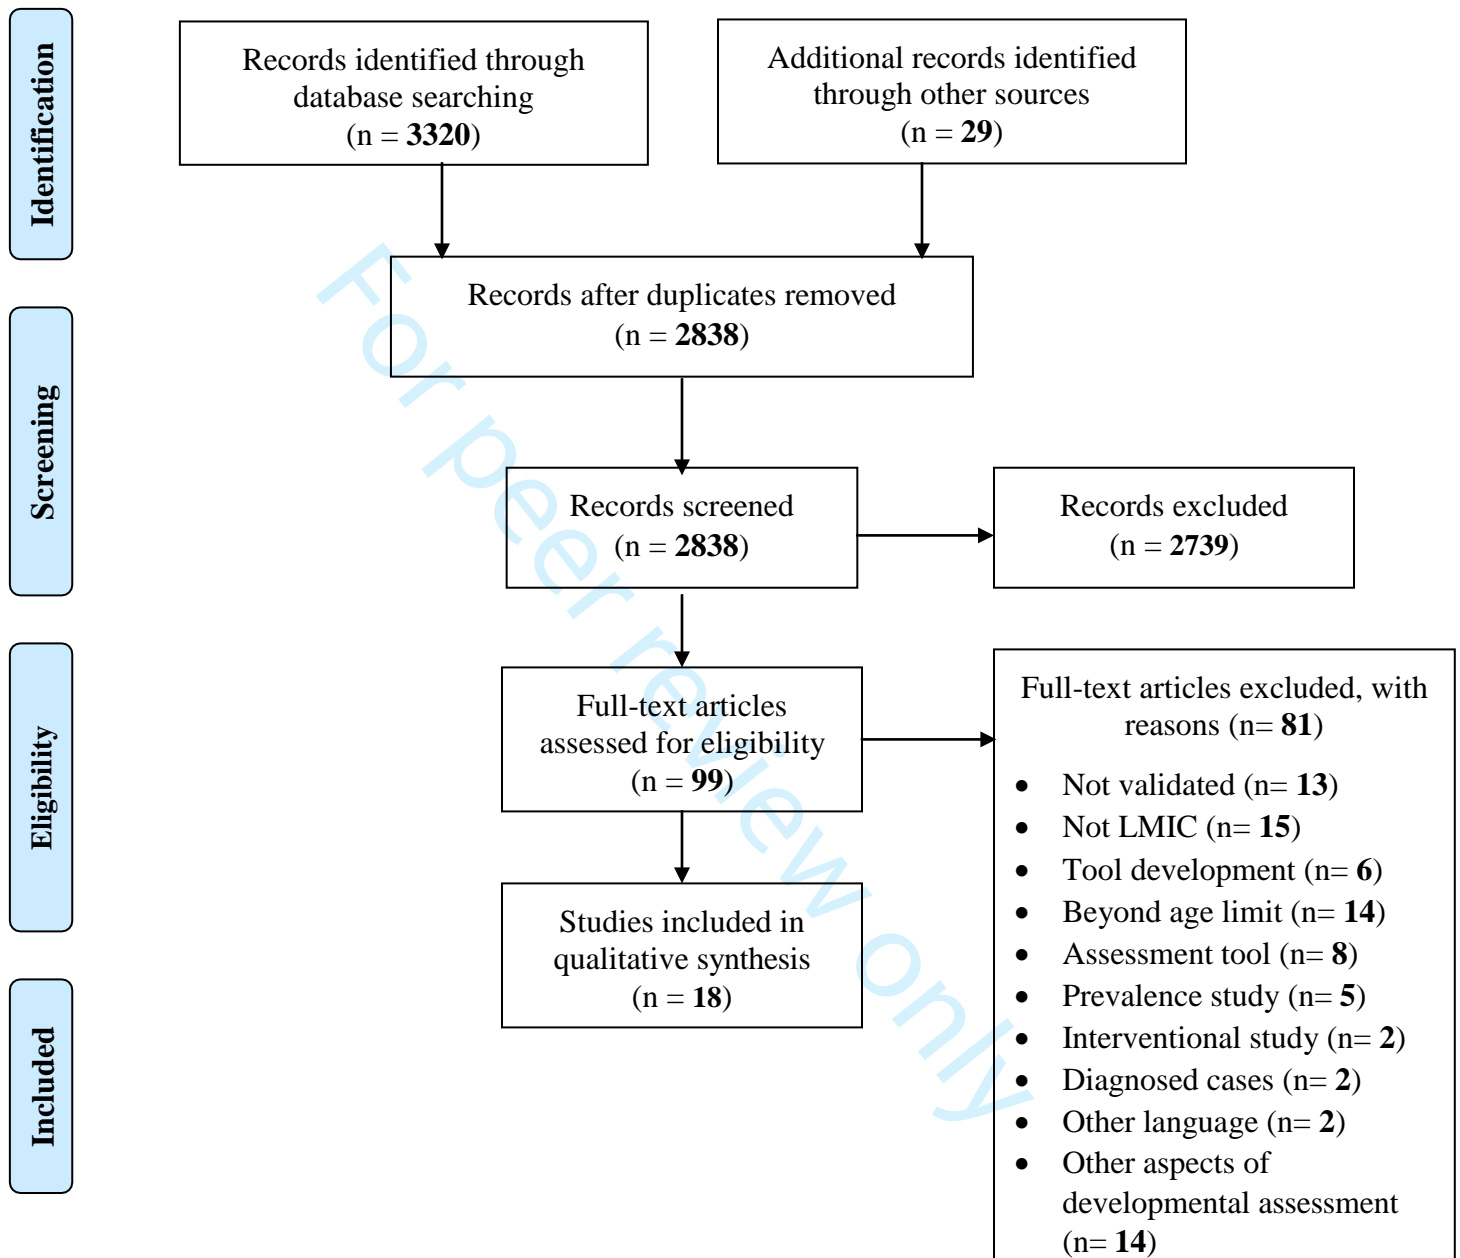

**Supplementary Figure S1: Correlation between NMR and Prevalence of DD (Taiwan  
1997-2008)**

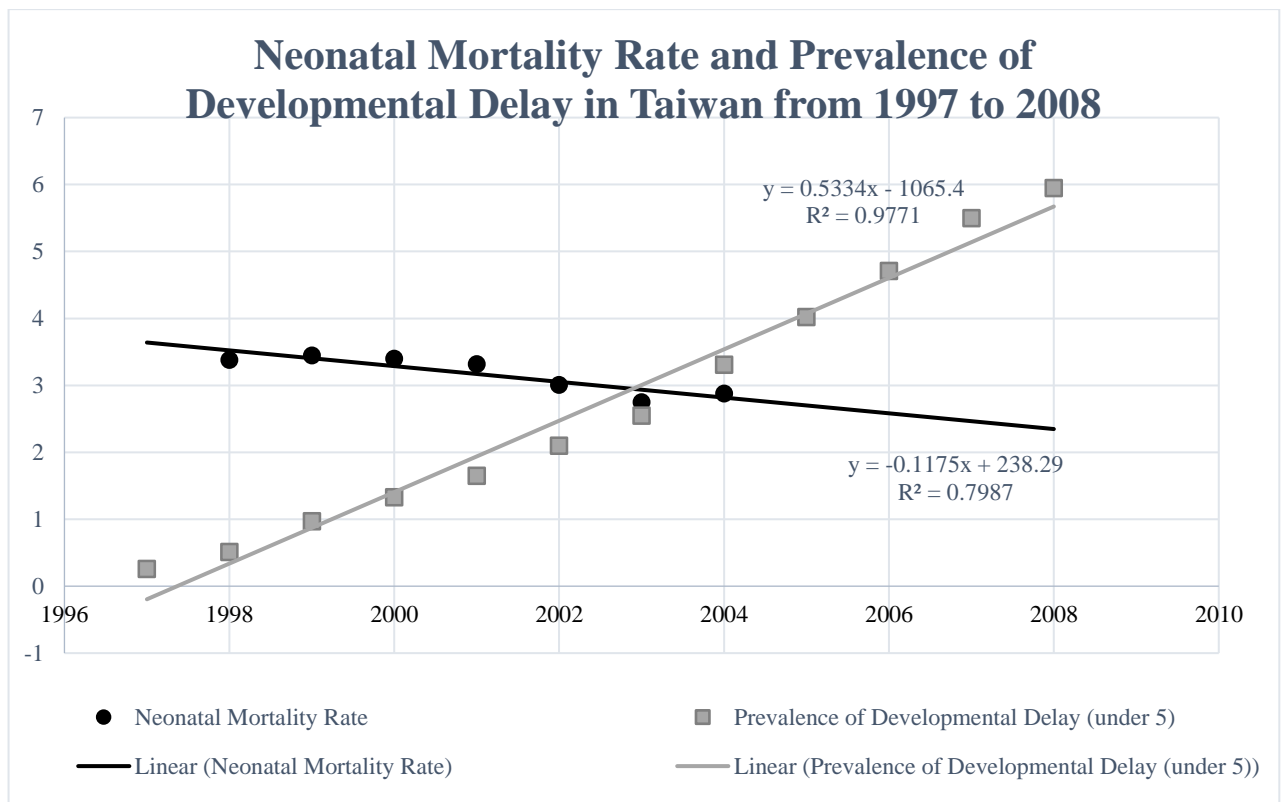

**Figure S1: Correlation between neonatal mortality rate and prevalence of developmental delay (Taiwan  
1997-2008)**

Footnote: We have used prevalence of developmental delay among under 5 children (1997-2008) from a nation-wide population based retrospective study [18] and neonatal mortality rate (1998-2004) from another study [19]. It was revealed that the prevalence of developmental delay is positively associated with time and negatively associated with NMR. So, it can be said that, with time, while neonatal mortality rate is reducing, the prevalence of developmental delay is gradually increasing.



## Supplementary Table S1: Medline search strategy

**MEDLINE: Systematic review - screening for disorders in children in LMIC (as at 05.03.18) Notes:  
No date or language limits applied.**

Database: Ovid MEDLINE <1946 to 2018 February 28> (Phase 1)

Search Strategy:

```

1  exp Mass Screening/ (114856)
2  screen$.tw. (543259)
3  exp DIAGNOSIS/ (7780076)
4  (early adj5 (diagnos$ or identif$ or detect$ or discover$)).tw. (179324)
5  1 or 2 or 3 or 4 (8132793)
6  exp "Surveys and Questionnaires"/ (881308)
7  (survey$ or questionnaire$).tw. (745680)
8  (instrument$ or tool$).tw. (665937)
9  6 or 7 or 8 (1849661)
10 5 and 9 (774120)
11 exp Neurodevelopmental Disorders/ (162135)
12 exp Motor Disorders/ (197)
13 exp Cerebral Palsy/ (18455)
14 (cerebral adj pals$).tw. (17316)
15 CP.tw. (36947)
16 exp Cognitive Dysfunction/ (7530)
17 exp Communication Disorders/ (59072)
18 ((development$ or motor$ or speech$ or cogniti$ or behav$) adj5 (disorder$ or disabilit$ or
condition$ or impair$ or deficit$)).tw. (200268)
19 11 or 12 or 13 or 14 or 15 or 16 or 17 or 18 (415783)
20 10 and 19 (27683)
21 exp Developing Countries/ (69408)
22 exp ASIA/ (698877)
23 exp AFRICA/ (230576)
24 exp South America/ (134532)
25 asia$.tw. (100200)
26 africa$.tw. (169185)
27 (south adj1 america$).tw. (14876)
28 (low adj2 income adj2 countr$).tw. (4196)
29 (middle adj2 income adj2 countr$).tw. (7713)
30 LMIC.tw. (649)
31 21 or 22 or 23 or 24 or 25 or 26 or 27 or 28 or 29 or 30 (1214625)
32 20 and 31 (2207)
33 limit 32 to humans (2185)
34 remove duplicates from 33 (2183)
35 limit 34 to "all child (0 to 18 years)" (1270)
36 exp INFANT/ (1056001)
37 exp CHILD/ (1753019)
38 exp ADOLESCENT/ (1842871)
39 (paediatric$ or pediatric$ or child$ or adolescen$ or teen$ or infant$ or baby or babies).tw.
(1586099)
40 36 or 37 or 38 or 39 (3520016)
41 34 and 40 (1313)
42 35 or 41 (1313)
*****

```

Database: Ovid MEDLINE(R) ALL <1946 to July 13, 2020> (Phase 2)

Search Strategy:

-----

1 exp Mass Screening/ (127799)  
 2 screen\$.tw. (748410)  
 3 exp DIAGNOSIS/ (8521264)  
 4 (early adj5 (diagnos\$ or identif\$ or detect\$ or discover\$)).tw. (247525)  
 5 1 or 2 or 3 or 4 (9082816)  
 6 exp "Surveys and Questionnaires"/ (1030942)  
 7 (survey\$ or questionnaire\$.tw. (1039336)  
 8 (instrument\$ or tool\$).tw. (981681)  
 9 6 or 7 or 8 (2492583)  
 10 5 and 9 (930528)  
 11 exp Neurodevelopmental Disorders/ (180714)  
 12 exp Motor Disorders/ (480)  
 13 exp Cerebral Palsy/ (20558)  
 14 (cerebral adj pals\$).tw. (22436)  
 15 CP.tw. (54326)  
 16 exp Cognitive Dysfunction/ (17245)  
 17 exp Communication Disorders/ (63349)  
 18 ((development\$ or motor\$ or speech\$ or cogniti\$ or behav\$) adj5 (disorder\$ or disabilit\$ or condition\$ or impair\$ or deficit\$)).tw. (283402)  
 19 11 or 12 or 13 or 14 or 15 or 16 or 17 or 18 (537248)  
 20 10 and 19 (34449)  
 21 exp Developing Countries/ (74723)  
 22 exp ASIA/ (832820)  
 23 exp AFRICA/ (265707)  
 24 exp South America/ (161136)  
 25 asia\$.tw. (146545)  
 26 africa\$.tw. (228897)  
 27 (south adj1 america\$).tw. (21374)  
 28 (low adj2 income adj2 countr\$).tw. (7421)  
 29 (middle adj2 income adj2 countr\$).tw. (18310)  
 30 LMIC.tw. (1795)  
 31 21 or 22 or 23 or 24 or 25 or 26 or 27 or 28 or 29 or 30 (1497552)  
 32 20 and 31 (2846)  
 33 limit 32 to humans (2778)  
 34 limit 33 to "all child (0 to 18 years)" (1553)  
 35 exp INFANT/ (1136560)  
 36 exp CHILD/ (1905000)  
 37 exp ADOLESCENT/ (2022225)  
 38 (paediatric\$ or pediatric\$ or child\$ or adolescen\$ or teen\$ or infant\$ or baby or babies).tw. (1999177)  
 39 35 or 36 or 37 or 38 (4073700)  
 40 33 and 39 (1614)  
 41 34 or 40 (1614)  
 42 limit 41 to yr="2018 -Current" (242)

\*\*\*\*\*

**Supplementary Table S2:** List of key definitions regarding study selection

| <b>Key words</b>                | <b>Definitions</b>                                                                                                                                                                                                           |
|---------------------------------|------------------------------------------------------------------------------------------------------------------------------------------------------------------------------------------------------------------------------|
| <b>Assessment</b>               | Assessment is a process for defining the nature of that problem, determining a diagnosis, and developing specific treatment recommendations for addressing the problem or diagnosis.                                         |
| <b>Developmental Assessment</b> | In-depth examination of child's development conducted by developmental pediatrician/ child psychologist                                                                                                                      |
| <b>Developmental Delay</b>      | A condition where a child does not reach it's developmental milestones at the expected times                                                                                                                                 |
| <b>Developmental Disability</b> | The severe and chronic form of developmental delay which is expected to continue indefinitely and substantially restricts the individual's daily living activities                                                           |
| <b>Developmental Domain</b>     | A collective term used to describe different aspects of brain growth and development                                                                                                                                         |
| <b>Developmental Monitoring</b> | Observing child's developmental progress by parents/ caregivers                                                                                                                                                              |
| <b>Developmental Screening</b>  | Looking for specific developmental concern by doctors/ healthcare professionals using brief questionnaire/ checklist                                                                                                         |
| <b>Disability</b>               | any restriction or lack (resulting from an impairment) of ability to perform an activity in the manner or within the range considered normal for a human being.                                                              |
| <b>Gray Literature</b>          | Research that is either unpublished or has been published in non-commercial form. Example: government reports, conference proceedings, pre-prints and post-prints of articles, theses and dissertations, etc.                |
| <b>Hand Searching</b>           | The page-by-page examination of journal issues, conference proceedings, reference lists of journal articles and other publications for relevant studies                                                                      |
| <b>Impairment</b>               | any loss or abnormality of psychological, physiological or anatomical structure or function.                                                                                                                                 |
| <b>Item</b>                     | List of activities under a screening tool or questionnaire                                                                                                                                                                   |
| <b>Monitoring</b>               | monitoring involves routine evaluation of changes to health or health risks                                                                                                                                                  |
| <b>Original Article</b>         | It is the report of a study written by the researchers who conducted the study                                                                                                                                               |
| <b>Psychometric Properties</b>  | Psychometric properties refer to the reliability and validity of a test                                                                                                                                                      |
| <b>Reliability</b>              | Reliability refers to the extent to which an assessment/ screening tool produces stable and consistent results                                                                                                               |
| <b>Review Article</b>           | Critical and constructive analysis of existing published literature in a field, considered as secondary literature.                                                                                                          |
| <b>Screening</b>                | Screening is a process for evaluating the possible presence of a particular problem. The outcome is normally a simple yes or no                                                                                              |
| <b>Sensitivity</b>              | The ability of a test to correctly identify those who have the disease                                                                                                                                                       |
| <b>specificity</b>              | The ability of a test to correctly identify those who do not have the disease                                                                                                                                                |
| <b>Surveillance</b>             | Ongoing systematic collection of health data essential to the planning, implementation and evaluation of the public health practice closely integrated with the timely dissemination of these data to those who need to know |
| <b>Validity</b>                 | The ability of a test to distinguish between who has a disease and who does not                                                                                                                                              |

**Supplementary Table S3:** Selection criteria used for participation in the studies

| Ref. | Inclusion Criteria                                                                                                        | Exclusion Criteria                                                                                                                                                         |
|------|---------------------------------------------------------------------------------------------------------------------------|----------------------------------------------------------------------------------------------------------------------------------------------------------------------------|
| [34] | Children attending the study hospital                                                                                     | Children without a proper birth record<br>Children not accompanied by a caregiver at the time of evaluation                                                                |
| [35] | Children living in the study area                                                                                         | Not applicable                                                                                                                                                             |
| [36] | Parents willing to participate                                                                                            | Not applicable                                                                                                                                                             |
| [37] | Children living in the study area                                                                                         | Not applicable                                                                                                                                                             |
| [38] | Very Low Birth Weight Children treated in NICU of the study hospital                                                      | Not applicable                                                                                                                                                             |
| [39] | Children living in the study area                                                                                         | Not applicable                                                                                                                                                             |
| [40] | Children whose parents/ primary caregiver gave consent                                                                    | Ill children<br>Children uncooperative for testing                                                                                                                         |
| [41] | Afrikaans, Tswana or English speaking parents or guardian                                                                 | Children suspected or diagnosed with mental retardation, autism or neuromotor delay                                                                                        |
| [42] | Children attending the study hospital                                                                                     | Children with acute illness<br>Children not accompanied by parents<br>Children whose parents did not give consent to participate                                           |
| [43] | Children with apparently normal development                                                                               | Children with acute and chronic disease<br>Children not accompanied by a caregiver<br>Children with illiterate caregiver                                                   |
| [44] | Parents completed primary education<br>Parents able to read Hindi<br>Parents living with the child                        | Premature children<br>Children with acute severe illness<br>Previous diagnosis of developmental disorder                                                                   |
| [45] | Children attending the study hospital                                                                                     | Premature children<br>Previous diagnosis of developmental delay<br>Children with a visual/hearing problem<br>The accompanying parent does not understand the Thai language |
| [46] | Parents willing to participate                                                                                            | Chronically ill children<br>Previous diagnosis of developmental delay                                                                                                      |
| [47] | Children living in the study area                                                                                         | Children whose parents did not give consent to participate                                                                                                                 |
| [48] | Afrikaans or English speaking parents<br>Parents visiting the primary health care clinics<br>Parents asked to participate | Not applicable                                                                                                                                                             |
| [49] | Children born to mothers enrolled in "Malaria in Pregnancy Preventive Alternative Drugs" trial                            | Non-singleton births                                                                                                                                                       |
| [50] | <b>Community:</b> Children living in the study area<br><b>Hospital:</b> Children attending the study hospital             | Not applicable                                                                                                                                                             |
| [51] | Not applicable                                                                                                            | Children with congenital malformation, acute illness and mental retardation                                                                                                |

**Supplementary Table S4: List of Rejected Studies and Tools**

|     | <b>Ref</b>                  | <b>Tool</b>       | <b>Reason of Rejection</b>                                                   |
|-----|-----------------------------|-------------------|------------------------------------------------------------------------------|
| 1.  | Biasini et al. 2015         | 12 month Screener | Tool Development<br>Intervention study                                       |
| 2.  | Wirz et al. 2005            | ACCESS Portfolio  | Disability Screening tool<br>Sensitivity-Specificity not measured            |
| 3.  | Ngoun et al. 2012           | AHC DMAT          | Tool development<br>1-6 years<br>Sensitivity-Specificity not measured        |
| 4.  | Kwun et al. 2014            | ASQ               | Validated in non LIMC country                                                |
| 5.  | Salomonsson et al. 2010     | ASQ:SE            | Validated in non LIMC country                                                |
| 6.  | Bian et al. 2017            | ASQ:SE            | Translation and adaptation<br>Sensitivity-Specificity not measured           |
| 7.  | Parveen et al. 2014         | BSID-II           | Assessment tool<br>Tool adaptation                                           |
| 8.  | Ranjitkar et al. 2018       | Bayley III        | Efficacy of vitamin B12 supplementation on<br>growth<br>and neurodevelopment |
| 9.  | Rizzoli-Córdoba et al. 2015 | BDI-2 ST          | Prevalence study<br>English translation is not available                     |
| 10. | Kishore et al. 2018         | BDST              | Correlation Study<br>Sensitivity-Specificity not measured                    |
| 11. | Pathak et al. 1991          | BDST              | Preparing developmental curve<br>Sensitivity-Specificity not measured        |
| 12. | Guedes et al. 2011          | BINS              | Sensitivity-Specificity not clearly<br>documented                            |
| 13. | Sheldrick et al. 2013       | BPSC              | Validated in non LIMC country                                                |
| 14. | Glascoe et al. 2005         | Brigance-II       | Validated in non LIMC country                                                |
| 15. | Ireton et al. 1996          | CDR-PQ            | Validated in non LIMC country                                                |
| 16. | Liao et al. 2008            | CDIIT             | Validated in non LIMC country                                                |
| 17. | McCoy et al. 2017           | CREDI             | Tool development,<br>Correlation study                                       |
| 18. | Altafim et al. 2018         | CREDI             | Sensitivity-Specificity not measured                                         |
| 19. | Wetherby et al. 2003        | CSBS-DP           | Validated in non LIMC country                                                |
| 20. | Nair et al. 2009            | DATA              | Tool development and standardization<br>Sensitivity-Specificity not measured |
| 21. | Nair et al. 2012            | DATA II           | Tool development                                                             |
| 22. | Luiz et al. 2004            | DDST II           | 3-6 years<br>Correlation study                                               |
| 23. | Wijedasa et al. 2011        | DDST II           | Adaptation and standardization                                               |
| 24. | Shahshahani et al. 2010     | DDST II           | 0-6 years                                                                    |
| 25. | Scherzer et al 2009         | DMChart           | 0-8 years<br>Sensitivity-Specificity not measured                            |
| 26. | Abubakar et al. 2009        | DMChecklist       | Correlation study<br>Sensitivity-Specificity not measured                    |
| 27. | Prado et al. 2014           | DMCchecklist II   | Correlation study<br>Sensitivity-Specificity not measured                    |
| 28. | Chopra et al. 1999          | DSS               | Disability Screening tool<br>0-6 years                                       |
| 29. | Velez et al. 2007           | EAD 1             | Prevalence Study                                                             |
| 30. | Rao et al. 2014             | EAP ECDS          | Assessment tool<br>36-71 months                                              |
| 31. | Janus et al. 2007           | EDI               | 4-6 years<br>Validated in non LIMC country                                   |
| 32. | Verdisco et al. 2015        | Engle             | Correlation study<br>Sensitivity-Specificity not measured                    |
| 33. | Schafer et al. 2014         | ERIC              | Validated in non LIMC country                                                |
| 34. | Meisels et al. 1993         | ESI-R             | 3-6 years                                                                    |

|     |                                                |                |                                                                    |
|-----|------------------------------------------------|----------------|--------------------------------------------------------------------|
|     |                                                |                | Validated in non LIMC country                                      |
| 35. | Lenkarski et al. 2001                          | ESP            | Validated in non LIMC country                                      |
| 36. | Hatakenaka et al. 2016                         | ESSENCE-Q      | 0-6 years<br>Validated in non LIMC country                         |
| 37. | Munir et al. 1999                              | IBAS           | Assessment tool<br>1-10 years                                      |
| 38. | Gulati et al. 2014                             | INCLEN-NDST    | 2-9 years                                                          |
| 39. | Fernandes et al. 2014<br>Murray et al. 2018    | Intergrowth-21 | Assessment tool                                                    |
| 40. | Abubakar et al. 2008                           | KDI            | Assessment tool<br>Part of sample consists of children with NDD    |
| 41. | Gladstone et al. 2008<br>Gladstone et al. 2010 | MDAT           | Assessment tool<br>0-6 years                                       |
| 42. | Hwang et al. 2015                              | MuSiC          | Validated in non LIMC country                                      |
| 43. | Arya et al. 1991                               | NIMH-DSS       | 0-6 years                                                          |
| 44. | Schroeder et al. 2014                          | PCQ            | Sensitivity-Specificity not clearly documented                     |
| 45. | Malik et al. 2007                              | PDST           | Sensitivity-Specificity not measured                               |
| 46. | Sheldrick et al. 2012                          | PPSC           | 1.5-5.5 years<br>Tool development<br>Validated in non LIMC country |
| 47. | Simonian and Tarnowski 2001                    | PSC            | 4-16 years                                                         |
| 48. | Boyede et al. 2016                             | Red Cross      | Validated among HIV infected children                              |
| 49. | Islam et al. 2016                              | RNDA           | Assessment tool<br>Prediction                                      |
| 50. | Ara et al. 2015                                | RNDA           | Prevalence of NDI                                                  |
| 51. | Khan et al. 2014                               | RNDA           | Assessment<br>2-9 years                                            |
| 52. | Haataja et al. 2002                            | Shoklo         | Assessment tool<br>Validated in non LIMC cohort                    |
| 53. | Sheldrick and Perrin 2013                      | SWYC           | Tool development                                                   |
| 54. | Wu et al. 2012                                 | TQP            | Association study                                                  |
| 55. | Pérez-Escamilla 2017                           |                | Spanish                                                            |

**Supplementary Table S5:** Example of culture-sensitive BSID-II items for Bangladeshi infants (adopted from [66])

|                 | <b>Original</b>                      | <b>Culture Sensitive</b>                |
|-----------------|--------------------------------------|-----------------------------------------|
| <b>Picture</b>  | Pomfret                              | Ilish                                   |
|                 | Star                                 | National Flag                           |
|                 | House with chimney                   | Tin-shed house                          |
| <b>Material</b> | Sugar pellet                         | Iron tablets                            |
|                 | Small toy (rabbit)                   | Small doll (boy or girl)                |
|                 | Thomas The Tank Engine Visits a Farm | Shishur Jotno' from 'Meena Raju Series' |
|                 | Sugar pellet                         | Iron tablets                            |
| <b>Word</b>     | Auto                                 | Vo                                      |
|                 | Leaf                                 | Pata/ Shak                              |

**Supplementary Table S6:** Basic properties of ASQ and PEDS (adopted from [72])

| <b>Characteristic</b>        | <b>PEDS</b>                                                                                                                       | <b>ASQ</b>                                                                                                |
|------------------------------|-----------------------------------------------------------------------------------------------------------------------------------|-----------------------------------------------------------------------------------------------------------|
| <b>Screening approach</b>    | Parents' developmental concerns                                                                                                   | Parents provide information about child's skills                                                          |
| <b>Age Range</b>             | 0 to 96 months                                                                                                                    | 1 to 66 months                                                                                            |
| <b>Questionnaire</b>         | One                                                                                                                               | 21 sets of questionnaire for 21 age groups                                                                |
| <b>Developmental domains</b> | Gross motor, Fine motor, Cognitive, Expressive language, Receptive language, Self-help, Social-emotional, Behavior, School, Other | Gross motor, Fine motor, Problem solving, Communication, Personal-social                                  |
| <b>Format</b>                | 10 questions covering 9 developmental concerns<br>Response options: no/yes/a little                                               | 30 questions covering 5 developmental domains<br>Response options: yes/sometimes/not yet                  |
| <b>Example of item</b>       | Expressive language: "Do you have any concerns about how your child talks and makes speech sounds?"                               | Communication skill at 18 months: "Does your child say 8 or more words in addition to 'Mama' and 'Dada'?" |
| <b>Time to screen</b>        | 5 min of parent time<br>1-2 min for provider/staff to score                                                                       | 10-15 min of parent time<br>1-2 min for provider/staff to score                                           |



| Section/topic             | # | Checklist item                                                                                                                                                                                                                                                                                              | Reported on page # |
|---------------------------|---|-------------------------------------------------------------------------------------------------------------------------------------------------------------------------------------------------------------------------------------------------------------------------------------------------------------|--------------------|
| <b>TITLE</b>              |   |                                                                                                                                                                                                                                                                                                             |                    |
| Title                     | 1 | Identify the report as a systematic review, meta-analysis, or both.                                                                                                                                                                                                                                         | Title file         |
| <b>ABSTRACT</b>           |   |                                                                                                                                                                                                                                                                                                             |                    |
| Structured summary        | 2 | Provide a structured summary including, as applicable: background; objectives; data sources; study eligibility criteria, participants, and interventions; study appraisal and synthesis methods; results; limitations; conclusions and implications of key findings; systematic review registration number. | 2-3                |
| <b>INTRODUCTION</b>       |   |                                                                                                                                                                                                                                                                                                             |                    |
| Rationale                 | 3 | Describe the rationale for the review in the context of what is already known.                                                                                                                                                                                                                              | 4-6                |
| Objectives                | 4 | Provide an explicit statement of questions being addressed with reference to participants, interventions, comparisons, outcomes, and study design (PICOS).                                                                                                                                                  | 6                  |
| <b>METHODS</b>            |   |                                                                                                                                                                                                                                                                                                             |                    |
| Protocol and registration | 5 | Indicate if a review protocol exists, if and where it can be accessed (e.g., Web address), and, if available, provide registration information including registration number.                                                                                                                               | 10                 |
| Eligibility criteria      | 6 | Specify study characteristics (e.g., PICOS, length of follow-up) and report characteristics (e.g., years considered, language, publication status) used as criteria for eligibility, giving rationale.                                                                                                      | 7-8                |
| Information sources       | 7 | Describe all information sources (e.g., databases with dates of coverage, contact with study authors to identify additional studies) in the search and date last searched.                                                                                                                                  | 7                  |
| Search                    | 8 | Present full electronic search strategy for at least one database, including any limits used, such that it could be repeated.                                                                                                                                                                               | Table S1           |
| Study selection           | 9 | State the process for selecting studies (i.e., screening, eligibility, included in systematic review, and, if applicable, included in the meta-analysis).                                                                                                                                                   | 7-10               |



1  
2  
3  
4  
5  
6  
7  
8  
9  
10  
11  
12  
13  
14  
15  
16  
17  
18  
19  
20  
21  
22  
23  
24  
25  
26  
27  
28  
29  
30  
31  
32  
33  
34  
35  
36  
37  
38  
39  
40  
41  
42  
43  
44  
45  
46

|                                    |    |                                                                                                                                                                                                                        |                             |
|------------------------------------|----|------------------------------------------------------------------------------------------------------------------------------------------------------------------------------------------------------------------------|-----------------------------|
| Data collection process            | 10 | Describe method of data extraction from reports (e.g., piloted forms, independently, in duplicate) and any processes for obtaining and confirming data from investigators.                                             | 9-10                        |
| Data items                         | 11 | List and define all variables for which data were sought (e.g., PICOS, funding sources) and any assumptions and simplifications made.                                                                                  | 7-9<br>Table S2             |
| Risk of bias in individual studies | 12 | Describe methods used for assessing risk of bias of individual studies (including specification of whether this was done at the study or outcome level), and how this information is to be used in any data synthesis. | 9-10                        |
| Summary measures                   | 13 | State the principal summary measures (e.g., risk ratio, difference in means).                                                                                                                                          | Sensitivity,<br>Specificity |
| Synthesis of results               | 14 | Describe the methods of handling data and combining results of studies, if done, including measures of consistency (e.g., I <sup>2</sup> ) for each meta-analysis.                                                     | N/A                         |

Page 1 of 2

| Section/topic               | #  | Checklist item                                                                                                                                                  | Reported on page #            |
|-----------------------------|----|-----------------------------------------------------------------------------------------------------------------------------------------------------------------|-------------------------------|
| Risk of bias across studies | 15 | Specify any assessment of risk of bias that may affect the cumulative evidence (e.g., publication bias, selective reporting within studies).                    | N/A                           |
| Additional analyses         | 16 | Describe methods of additional analyses (e.g., sensitivity or subgroup analyses, meta-regression), if done, indicating which were pre-specified.                | N/A                           |
| <b>RESULTS</b>              |    |                                                                                                                                                                 |                               |
| Study selection             | 17 | Give numbers of studies screened, assessed for eligibility, and included in the review, with reasons for exclusions at each stage, ideally with a flow diagram. | Fig 1                         |
| Study characteristics       | 18 | For each study, present characteristics for which data were extracted (e.g., study size, PICOS, follow-up period) and provide the citations.                    | 9-10                          |
| Risk of bias within studies | 19 | Present data on risk of bias of each study and, if available, any outcome level assessment (see item 12).                                                       | N/A<br>(eliminated in revised |

|                               |    |                                                                                                                                                                                                          |             |
|-------------------------------|----|----------------------------------------------------------------------------------------------------------------------------------------------------------------------------------------------------------|-------------|
|                               |    |                                                                                                                                                                                                          | manuscript) |
| Results of individual studies | 20 | For all outcomes considered (benefits or harms), present, for each study: (a) simple summary data for each intervention group (b) effect estimates and confidence intervals, ideally with a forest plot. | 14-27       |
| Synthesis of results          | 21 | Present results of each meta-analysis done, including confidence intervals and measures of consistency.                                                                                                  | N/A         |
| Risk of bias across studies   | 22 | Present results of any assessment of risk of bias across studies (see Item 15).                                                                                                                          | N/A         |
| Additional analysis           | 23 | Give results of additional analyses, if done (e.g., sensitivity or subgroup analyses, meta-regression [see Item 16]).                                                                                    | N/A         |
| <b>DISCUSSION</b>             |    |                                                                                                                                                                                                          |             |
| Summary of evidence           | 24 | Summarize the main findings including the strength of evidence for each main outcome; consider their relevance to key groups (e.g., healthcare providers, users, and policy makers).                     | 28-32       |
| Limitations                   | 25 | Discuss limitations at study and outcome level (e.g., risk of bias), and at review-level (e.g., incomplete retrieval of identified research, reporting bias).                                            | 32-33       |
| Conclusions                   | 26 | Provide a general interpretation of the results in the context of other evidence, and implications for future research.                                                                                  | 33-34       |
| <b>FUNDING</b>                |    |                                                                                                                                                                                                          |             |
| Funding                       | 27 | Describe sources of funding for the systematic review and other support (e.g., supply of data); role of funders for the systematic review.                                                               | N/A         |

From: Moher D, Liberati A, Tetzlaff J, Altman DG, The PRISMA Group (2009). Preferred Reporting Items for Systematic Reviews and Meta-Analyses: The PRISMA Statement. PLoS Med 6(6): e1000097. doi:10.1371/journal.pmed1000097

For more information, visit: [www.prisma-statement.org](http://www.prisma-statement.org).

# BMJ Open

## Screening Tools for Early Identification of Children with Developmental Delay in Low- and Middle-income Countries: A Systematic Review

|                                 |                                                                                                                                                                                                                                                                                                                                                                                                                                                                                                                                                                                                                                                                                                                                                                                                                                                                                                                                                                                                                                                                                                                              |
|---------------------------------|------------------------------------------------------------------------------------------------------------------------------------------------------------------------------------------------------------------------------------------------------------------------------------------------------------------------------------------------------------------------------------------------------------------------------------------------------------------------------------------------------------------------------------------------------------------------------------------------------------------------------------------------------------------------------------------------------------------------------------------------------------------------------------------------------------------------------------------------------------------------------------------------------------------------------------------------------------------------------------------------------------------------------------------------------------------------------------------------------------------------------|
| Journal:                        | <i>BMJ Open</i>                                                                                                                                                                                                                                                                                                                                                                                                                                                                                                                                                                                                                                                                                                                                                                                                                                                                                                                                                                                                                                                                                                              |
| Manuscript ID                   | bmjopen-2020-038182.R2                                                                                                                                                                                                                                                                                                                                                                                                                                                                                                                                                                                                                                                                                                                                                                                                                                                                                                                                                                                                                                                                                                       |
| Article Type:                   | Original research                                                                                                                                                                                                                                                                                                                                                                                                                                                                                                                                                                                                                                                                                                                                                                                                                                                                                                                                                                                                                                                                                                            |
| Date Submitted by the Author:   | 19-Oct-2020                                                                                                                                                                                                                                                                                                                                                                                                                                                                                                                                                                                                                                                                                                                                                                                                                                                                                                                                                                                                                                                                                                                  |
| Complete List of Authors:       | Faruk, Tasnuva; University of South Asia, Asian Institute of Disability and Development; Independent University, School of Public Health King, Catherine; The University of Sydney, National Centre for Immunisation Research and Surveillance (NCIRS), The Children's Hospital at Westmead<br>Muhit, Mohammad; University of South Asia, Asian Institute of Disability and Development ; CSF Global<br>Islam, Md Kafiul; Independent University, Electrical and Electronic Engineering<br>Jahan, Israt; University of South Asia, Asian Institute of Disability and Development; Central Queensland University, School of Health, Medical and Applied Sciences<br>Baset, Kamran; Independent University, School of Public Health; BRAC, Road Safety and Driving School<br>Badawi, Nadia; University of Sydney SDN, Cerebral Palsy Alliance Research Institute; University of Sydney SDN, Discipline of Child and Adolescent Health, Sydney Medical School<br>Khandaker, Gulam; University of South Asia, Asian Institute of Disability and Development ; Central Queensland Hospital and Health Service, Public Health Unit |
| <b>Primary Subject Heading</b>: | Paediatrics                                                                                                                                                                                                                                                                                                                                                                                                                                                                                                                                                                                                                                                                                                                                                                                                                                                                                                                                                                                                                                                                                                                  |
| Secondary Subject Heading:      | Neurology                                                                                                                                                                                                                                                                                                                                                                                                                                                                                                                                                                                                                                                                                                                                                                                                                                                                                                                                                                                                                                                                                                                    |
| Keywords:                       | Developmental neurology & neurodisability < PAEDIATRICS, Paediatric neurology < PAEDIATRICS, Neonatal intensive & critical care < INTENSIVE & CRITICAL CARE, Neurological injury < NEUROLOGY, Community child health < PAEDIATRICS, PUBLIC HEALTH                                                                                                                                                                                                                                                                                                                                                                                                                                                                                                                                                                                                                                                                                                                                                                                                                                                                            |
|                                 |                                                                                                                                                                                                                                                                                                                                                                                                                                                                                                                                                                                                                                                                                                                                                                                                                                                                                                                                                                                                                                                                                                                              |

SCHOLARONE™  
Manuscripts



I, the Submitting Author has the right to grant and does grant on behalf of all authors of the Work (as defined in the below author licence), an exclusive licence and/or a non-exclusive licence for contributions from authors who are: i) UK Crown employees; ii) where BMJ has agreed a CC-BY licence shall apply, and/or iii) in accordance with the terms applicable for US Federal Government officers or employees acting as part of their official duties; on a worldwide, perpetual, irrevocable, royalty-free basis to BMJ Publishing Group Ltd ("BMJ") its licensees and where the relevant Journal is co-owned by BMJ to the co-owners of the Journal, to publish the Work in this journal and any other BMJ products and to exploit all rights, as set out in our [licence](#).

The Submitting Author accepts and understands that any supply made under these terms is made by BMJ to the Submitting Author unless you are acting as an employee on behalf of your employer or a postgraduate student of an affiliated institution which is paying any applicable article publishing charge ("APC") for Open Access articles. Where the Submitting Author wishes to make the Work available on an Open Access basis (and intends to pay the relevant APC), the terms of reuse of such Open Access shall be governed by a Creative Commons licence – details of these licences and which [Creative Commons](#) licence will apply to this Work are set out in our licence referred to above.

Other than as permitted in any relevant BMJ Author's Self Archiving Policies, I confirm this Work has not been accepted for publication elsewhere, is not being considered for publication elsewhere and does not duplicate material already published. I confirm all authors consent to publication of this Work and authorise the granting of this licence.

**Title:** Screening Tools for Early Identification of Children with Developmental Delay in Low- and Middle-income Countries: A Systematic Review

**Corresponding Author:** Dr. Tasnuva Faruk

Postal Address: Asian Institute of Disability and Development (AIDD), University of South Asia, House 78, Road 14, Block B, Banani, Dhaka-1213, Bangladesh.

Telephone: +880-1717440926; E-mail: [meghbalika04@gmail.com](mailto:meghbalika04@gmail.com)

**All Authors:** Tasnuva Faruk<sup>1,2</sup>, Catherine King<sup>3</sup>, Mohammad Muhit<sup>1,4</sup>, Md Kafiul Islam<sup>5</sup>, Israt Jahan<sup>1,4,6</sup>, Kamran ul Baset<sup>2,7</sup>, Nadia Badawi<sup>8,9</sup>, and Gulam Khandaker<sup>1,4,9,10</sup>

1. Asian Institute of Disability and Development (AIDD), University of South Asia, Dhaka, Bangladesh;
2. School of Public Health, Independent University, Bangladesh, Dhaka, Bangladesh;
3. National Centre for Immunisation Research and Surveillance (NCIRS), The Children's Hospital at Westmead, Sydney, Australia;
4. CSF Global, Dhaka, Bangladesh;
5. Department of Electrical and Electronic Engineering, Independent University, Bangladesh, Dhaka, Bangladesh;
6. School of Health, Medical and Applied Sciences, Central Queensland University, Rockhampton, Queensland 4701, Australia
7. Road Safety and Driving School, BRAC, Dhaka, Bangladesh;
8. Cerebral Palsy Alliance Research Institute, University of Sydney, Sydney, Australia;
9. Discipline of Child and Adolescent Health, Sydney Medical School, University of Sydney, Sydney, Australia;
10. Public Health Unit, Central Queensland Hospital and Health Service, Rockhampton, Queensland, Australia.

**Total Word Count: 7149**

1  
2  
3 **Screening Tools for Early Identification of Children with Developmental Delay in Low-**  
4 **and Middle-income Countries: A Systematic Review**  
5  
6  
7

8 **Running head:** Screening Tools for Developmental Delay  
9

10 **Article category:** Review Article  
11  
12

13 **Abstract**  
14

15  
16  
17  
18 **Objective:** To systematically review, identify and report the screening tools used for early  
19 identification of developmental delay in Low-and Middle-Income Countries.  
20  
21

22  
23  
24 **Design:** Systematic review  
25  
26

27 **Data sources:** Four bibliographic databases: Medline (1946 to July 13, 2020), Embase (1974  
28 to July 13, 2020), Scopus (1823 to July 11, 2020), and PsycINFO (1987 to July Week 1 2020).  
29  
30  
31

32  
33 **Eligibility criteria:** Peer-reviewed original articles published in English addressing validated  
34 culturally sensitive developmental screening tools among children aged < 5 years were  
35 included in this review.  
36  
37  
38

39  
40  
41 **Data extraction and synthesis:** One author (CK, medical librarian) developed the search  
42 strategy. Three authors conducted the database search (phase 1: CK; phase 2: IJ and MKI).  
43 Two authors (TF and IJ) independently screened the title and abstracts. TF, MKI and GK  
44 independently performed the full-text review of the screened articles. During each step of the  
45 study selection process, disagreements were resolved through discussion. PRISMA statement  
46 was used to guide the systematic review. Data extraction and analysis were performed using  
47 MS Excel. Meta-analysis was not possible due to heterogeneity of the study findings.  
48  
49  
50  
51  
52  
53  
54  
55  
56  
57  
58  
59  
60

1  
2  
3 **Results:** We identified 3349 articles, of which eighteen studies from ten countries, reporting  
4 sixteen screening tools, were selected for qualitative synthesis. Six cultural contexts were  
5 explored. Twelve general, two motor and two speech-language tools were identified. Seven of  
6 them found to be parent-completed ones. Five screening tools (American Speech-Language  
7 and Hearing Association, Guide for Monitoring Child Development, Infant Neurological  
8 International Battery, New Delhi – Development Screening Questionnaire and Woodside  
9 Screening Technique) reported relatively higher sensitivity (82.5-100)% and specificity (83-  
10 98.93)%.

11  
12  
13 **Conclusions:** Limited number of culturally sensitive developmental screening tools were  
14 validated for children aged <5 year in Low-and Middle-Income Countries. Revising existing  
15 screening tools in different ethnic and cultural settings and subsequent validation with  
16 normative value should be a research priority.

17  
18  
19 **PROSPERO registration number** CRD42018095232

20  
21  
22 **Key words:** Developmental delay, Disability, Screening, Early diagnosis, Rehabilitation,  
23 Low and Middle-Income Countries

### 24 25 26 **Strengths and limitations of this study**

- 27  
28  
29  
30  
31  
32  
33  
34  
35  
36  
37  
38  
39  
40  
41  
42  
43  
44  
45  
46  
47  
48  
49  
50  
51  
52  
53  
54  
55  
56  
57  
58  
59  
60
- This review puts together extensive literature searches on original studies (both observational and experimental) conducted among under-5 children from LMICs reporting standardization, validity (in terms of sensitivity and specificity) of developmental screening tools in early diagnosis of developmental delay.
  - Meta-analysis was not possible due to the heterogeneity of the study setting and findings.

- 1  
2  
3 ➤ Critical evaluation of the available screening tools in terms of diagnostic accuracy was  
4  
5 not possible to perform due to the unavailability of the necessary information.  
6  
7  
8  
9

## 10 **Introduction**

11  
12  
13 Developmental delay is a condition where children exhibit significant variation in achieving  
14  
15 developmental milestones as expected for their actual or adjusted age.[1-3] Complications at  
16  
17 birth including premature birth; brain trauma and encephalitis; severe medical problems after  
18  
19 birth; inborn metabolic errors; genetic or chromosomal abnormalities; inadequate stimulation;  
20  
21 malnutrition; iron deficiency anaemia; chronic illness; adverse environmental, familiar and  
22  
23 psychological states may lead to developmental delay.[4-6] Although the condition itself may  
24  
25 not be permanent, it can provide a foundation for recognizing children who might have more  
26  
27 severe and permanent health conditions i.e. developmental disabilities. Apart from  
28  
29 developmental delay, developmental disability is considered as a severe, chronic disability  
30  
31 originating at birth or during childhood, expected to continue indefinitely, and substantially  
32  
33 restricts the individual's functioning in several major life activities.[2, 7] Examples of  
34  
35 developmental disabilities include Autism Spectrum Disorder, Behavioural Disorders,  
36  
37 Cerebral Palsy, Down Syndrome, Fetal Alcohol Syndrome, Intellectual Disability, etc. As a  
38  
39 predictive of above-mentioned learning, movement and behavioral disorders, it is possible to  
40  
41 identify developmental delay to a great extent during the preschool period (i.e. before the age  
42  
43 of 5 years) with the help of well validated screening tools.[8, 9] There is a long-term financial  
44  
45 impact on society in terms of healthcare, educational support and other special services related  
46  
47 to developmental delay and/ disability. This is because the affected children require substantial  
48  
49 resources and increased cost over their lifespan compared to those without such conditions.[10]  
50  
51 This further accentuates the significance of early identification to initiate appropriate  
52  
53  
54  
55  
56  
57  
58  
59  
60



1  
2  
3 interventions and/ rehabilitations with the intention of preventing further delays, stimulating  
4 emerging skills and creating a more encouraging and protective surroundings.[5]  
5  
6  
7  
8  
9

10 In the last few decades, successful implementation of World Health Organization's  
11 (WHO's) key health services[11] regarding "The Countdown to 2015 Initiatives" resulted in  
12 the reduction of the neonatal mortality rate from 37 deaths per 1000 live births in 1990 to 19  
13 per 1000 live births in 2016, worldwide with a projection of further future reductions.[12, 13]  
14  
15 Among the survivors, more than 250 million under-5 children from Low-and Middle-Income  
16 Countries (LMICs) are not fulfilling their developmental potential in cognitive, motor, and  
17 social-emotional domains due to poor nutrition, poverty and conflicts.[4, 14-16] In addition to  
18 them, there is an undetected number of surviving children suffering from various forms of  
19 developmental delay presumably due to brain injury during the fetal, perinatal and post-  
20 neonatal period.[17] We have discovered that, with time, while the neonatal mortality rate is  
21 reducing, the prevalence of developmental delay is gradually increasing (by analysing the data  
22 generated from two nation-wide population-based retrospective studies conducted in Taiwan)  
23 (Supplementary Figure S1).[18, 19]  
24  
25  
26  
27  
28  
29  
30  
31  
32  
33  
34  
35  
36  
37  
38  
39  
40  
41  
42  
43  
44  
45  
46  
47  
48  
49  
50  
51  
52  
53  
54  
55  
56  
57  
58  
59  
60

Monitoring, screening, and surveillance have been found effective to track a child's  
developmental progress. As a means of tracking a child's developmental progress,  
developmental monitoring is the ordinary observation of child's developmental advancement  
performed by parents/ caregivers. On the contrary, developmental screening aims to identify  
specific developmental concern by doctors/ healthcare professionals using brief questionnaire/  
checklist. When such activity is performed on a regular basis during routine health check-ups,  
it is termed as developmental surveillance.[20, 21] Among them, developmental screening is  
the first step of the comprehensive diagnostic procedure for secondary prevention and early

1  
2  
3 identification of developmental delay.[16, 22, 23] Thus a well validated developmental  
4 screening tool is very important. The standardized tools available from western countries  
5 provide well-validated assessment in their own settings. However, the transfer of such western-  
6 based tools to non-western countries is linked with substantial limitations in terms of score  
7 interpretation and feasibility of their use in resource-constrained settings such as in LMICs.[24]  
8  
9 In the developed countries, early identification of developmental delay is considered as  
10 mandatory part of good healthcare practice which is recommended by the American Academy  
11 of Paediatrics.[16] In contrast, in LMICs, most teaching and training programs of health  
12 professionals are still concentrated on acute illness and growth aspects of children rather than  
13 a developmental perspective, resulting in limited attention in developmental delay.[16] Also,  
14 in these geographical areas, parents and caregivers with strong cultural beliefs and superstitions  
15 regarding health not only remain ignorant of the child's developmental deficit but also about  
16 the future impact of the condition.[25] The combined effect of these two factors often results  
17 in overlooking or delayed the diagnosis of developmental concerns.  
18  
19  
20  
21  
22  
23  
24  
25  
26  
27  
28  
29  
30  
31  
32  
33  
34  
35  
36  
37

38 The perspective on developmental disability varies from one culture to another. Along  
39 with economic, geographical, social factors, it often becomes a barrier to healthcare  
40 accessibility for children with disability.[26] In Chinese culture, having children with disability  
41 is often considered shameful for the family. In Southeast Asian cultures, parents often face  
42 social deprivation due to the stigma related to developmental disability.[27] Moreover, cultural  
43 believe often holds control over treatment approaches for developmental delay or disabilities,  
44 including: (1) whether to seek help or not; (2) which treatment option to choose; (3) parental  
45 expectations for their child; (4) interpersonal relationship between caregiver and healthcare  
46 professionals, etc.[28] One of the biggest challenges in early identification of developmental  
47 delay or disability is providing culturally sensitive screening tools, which not only include  
48  
49  
50  
51  
52  
53  
54  
55  
56  
57  
58  
59  
60

1  
2  
3 cultural perception of delay and/or disability but also easily adaptable across the various  
4 cultural/ nation.[24] Among the developmental domains, social development is culturally  
5 specific and difficult to adapt, whereas the gross motor domain is easier to adapt culturally.[29]  
6  
7  
8  
9  
10

11  
12 The purpose of this study was to look for the screening tools which have been used and  
13 validated for early identification of developmental delay in LMICs, to report how effective  
14 they are for early identification of developmental delay in terms of validity, and to identify  
15 areas for future research.  
16  
17  
18  
19  
20  
21  
22

## 23 **Materials and methods**

### 24 *Data sources and search strategy*

25  
26 To locate items on screening tools for early identification of developmental delay among  
27 children in low and middle-income countries, the search strategy was developed by an  
28 experienced medical librarian {Dr. Catherine King (CK)}. Literature search was conducted in  
29 two phases (phase 1 up to March 2018: CK; phase 2 up to July 2020: IJ and MKI) in four  
30 bibliographic databases. The databases searched were: OVID Medline (1946 to July 13, 2020),  
31 OVID Embase (1974 to July 13, 2020), SCOPUS (1823 to July 11, 2020), and PsycINFO (1987  
32 to July Week 1 2020). Search terms included database-specific thesaurus terms where available  
33 such as ‘Mass Screening’, ‘Diagnosis’, ‘Surveys and Questionnaires’, ‘Neurodevelopmental  
34 Disorders’, ‘Motor Disorders’, ‘Cerebral Palsy’, ‘Cognitive Dysfunction’, and  
35 ‘Communication Disorders’ as well as relevant associated text word terms. These were  
36 combined with low and middle-income country terms and infant, child and adolescent terms.  
37 To minimize the introduction of bias, no publication date and language limits were used. The  
38 date of the latest search was 13.07.2020. The Medline search strategy could be found online as  
39 Supplementary Table S1.  
40  
41  
42  
43  
44  
45  
46  
47  
48  
49  
50  
51  
52  
53  
54  
55  
56  
57  
58  
59  
60

1  
2  
3  
4  
5  
6  
7  
8  
9  
10  
11  
12  
13  
14  
15  
16  
17  
18  
19  
20  
21  
22  
23  
24  
25  
26  
27  
28  
29  
30  
31  
32  
33  
34  
35  
36  
37  
38  
39  
40  
41  
42  
43  
44  
45  
46  
47  
48  
49  
50  
51  
52  
53  
54  
55  
56  
57  
58  
59  
60

In addition to bibliographic database searches, we manually checked the reference lists of recent systematic reviews [30, 31] as well as articles included in the full-text review. We also contacted experts in the relevant field to identify any additional studies or information.

### ***Selection criteria***

Study inclusion criteria were: (1) Children aged less than 5 years who were at risk of developmental delay; (2) Original studies (both observational and experimental); (3) Study where single, as well as multiple developmental domains, were examined; (4) Studies conducted only in LMICs. The exclusion criteria were: (1) Studies conducted on diagnosed cases of developmental delay; (2) Studies focusing on autism spectrum disorder and other behavioural disorders; (3) Studies conducted among HIV exposed children; (4) Studies on developmental delay among children aged more than 5 years; (5) Interventional studies on developmental delay; (6) Studies on developmental delay published before 1946; (7) Article published in languages other than English; (8) Conference papers, letter to the editor, protocols, systematic reviews and ongoing studies; (9) Study conducted among children of eligible ethnic origin but in different country settings (i.e. children adopted from LMICs but study conducted in higher income countries). List of key definitions regarding study selection are available in Supplementary Table S2.

All the under-5 children who weren't previously diagnosed with any neurodevelopmental delay or disability, were considered as "at risk of developmental delay". Studies where overall or categorised (based on different age group/ cut off score) sensitivity-specificity of screening tools were examined and clearly reported, were considered as validated. We did not discriminate among screening, monitoring and surveillance tools. If any

1  
2  
3 of those tools were validated for screening developmental delay among under-5 children,  
4 considered eligible for inclusion. Tools which were declared as assessment tools by the  
5 developer themselves as well as studies where a tool was utilized for developmental assessment  
6 by the researchers, were excluded from the review.  
7  
8  
9  
10  
11  
12  
13  
14

15 When we had searched the keywords “Autism Spectrum Disorder” and  
16 “Developmental Delay” in the medical databases, the number of search items were as follows-  
17 i) OVID Medline- 9320: 12402; ii) OVID Embase- 21750: 7506; iii) Scopus- 20675: 7530 and  
18 iv) PsycINFO- 17130: 3067, respectively. Which is a bit alarming. We have excluded autism  
19 and other behavioural disorders from the study to provide undivided attention to developmental  
20 delay. Apart from scientific community, parents, and caregivers of LMICs are more familiar  
21 with the term ASD compared to Developmental Delay. Which is evident from growing  
22 concerns regarding speech-language and behavioural domains of child development compared  
23 to rest of the domains.[32] We believe, to ensure successful developmental screening/  
24 surveillance program in LMICs in the long run, and more importantly, to raise public awareness  
25 about developmental delay; we need to work more in this area than we used to.  
26  
27  
28  
29  
30  
31  
32  
33  
34  
35  
36  
37  
38  
39  
40  
41

42 LMICs consist of countries belonging to three World Bank income groups (low, lower-  
43 middle, and upper-middle) of WHO’s Member States. The classification is based on the  
44 estimated per capita gross national income. We have used the World Bank’s country  
45 classifications by income level (2020-2021) in this review.[33, 34]  
46  
47  
48  
49  
50  
51  
52  
53

#### 54 ***Study selection, data extraction and quality appraisal***

55 We carried out the following steps to decide on the studies: (1) Searching the above-mentioned  
56 databases using similar search strategy (CK, IJ, MKI); (2) Deduplicating and merging search  
57  
58  
59  
60

1  
2  
3 results using the EndNote bibliographic software (TF); (3) Examining titles and abstracts to  
4  
5 remove obviously irrelevant reports (TF, IJ, MKI); (4) Retrieving and examining the full text  
6  
7 reports of eligible studies (TF, MKI, GK); (5) Applying the selection criteria on the shortlisted  
8  
9 articles (TF, GK); (6) Making final decisions on study inclusion and proceeding for data  
10  
11 collection. Extracted information included: publication year, the country where the study was  
12  
13 conducted, the name of the screening tool, the gold standard tool(s) against which the screening  
14  
15 tool was validated, study design, study setting, sample size, sampling technique, the age of the  
16  
17 participants, selection criteria and sensitivity-specificity of the screening tools. During each  
18  
19 step of the study selection process, disagreements were resolved through discussion. We used  
20  
21 the Preferred Reporting Items for Systematic Reviews and Meta-Analyses (PRISMA)  
22  
23 statement, including 27- item PRISMA checklist to guide the systematic review.[35] The  
24  
25 quality of the selected studies was assessed using the Quality Assessment Tool for Diagnostic  
26  
27 Accuracy Studies-2 [36] (Supplementary Table S3) and Newcastle-Ottawa Scale for cross-  
28  
29 sectional studies [37] (Supplementary Table S4).  
30  
31  
32  
33  
34  
35  
36  
37

### 38 ***Data analysis***

39  
40 Individual study findings were reported including the country, study design, study setting,  
41  
42 sample size, sampling technique, proportions and age range of participants, sensitivity-  
43  
44 specificity of the developmental screening tools etc. Data extraction and analysis were  
45  
46 performed using MS Excel. We were unable to perform a meta-analysis due to the  
47  
48 heterogeneity of the study setting and findings.  
49  
50  
51  
52  
53

### 54 ***Protocol registration and ethical approval***

55  
56  
57  
58  
59  
60

1  
2  
3 The protocol of this systematic review has been registered in PROSPERO (registration number  
4 CRD42018095232). As this systematic review did not directly involve human or animal  
5 subjects, or access to medical records; ethical approval was not required.  
6  
7  
8  
9

### 10 11 12 ***Patient and public involvement*** 13

14 No patient involved  
15  
16

## 17 18 19 **Results** 20

### 21 ***Search results*** 22

23 The initial search retrieved 3349 records. We have found 3320 records from four bibliographic  
24 databases (1555 from OVID Medline, 1317 from OVID Embase, 348 from Scopus and 100  
25 from PsycINFO). 29 records were located by reviewing the reference lists of recent systematic  
26 reviews, fully extracted articles and consulting expert researchers in this area. There were 2838  
27 records once duplicates were removed. Following the screening of title and abstracts for  
28 articles, which described the validation of tools to screen developmental delay among children,  
29 99 articles were selected for further evaluation. After further review and application of  
30 selection criteria, 18 articles were selected for inclusion in study.[38-55] A PRISMA flow  
31 diagram has been prepared to illustrate the study selection process (as shown in Fig. 1).  
32  
33  
34  
35  
36  
37  
38  
39  
40  
41  
42  
43  
44  
45  
46

### 47 ***Summary of the included studies*** 48

49 All of the eighteen studies included for qualitative synthesis were original articles published in  
50 English, with a publication date range from 1991 to 2020 inclusive. Eight studies originated in  
51 “South Asia”, [38, 41, 44, 46, 48, 51, 54, 55] four from “East Asia and Pacific”, [39, 47, 49, 50]  
52 three from “Sub-Saharan Africa”, [45, 52, 53] one study each from the “Middle East and North  
53 Africa”, [43] “Latin America and Caribbean”, [40] and “Europe and Central Asia” [42] region  
54  
55  
56  
57  
58  
59  
60

1  
2  
3 of the World Bank. In total, sixteen developmental screening tools were used in ten countries.  
4  
5 Among the sixteen screening tools, American Speech-Language and Hearing Association  
6  
7 (ASHA), Language Evaluation Scale Trivandrum for 0-3 years LEST (LEST 0-3) focus on  
8  
9 language domain; Infant Neurological International Battery (INFANIB) and Little  
10  
11 Developmental Coordination Disorder Questionnaire (Little DCDQ) work on motor domains.  
12  
13 The remaining tools are for general developmental screening. A brief description of the  
14  
15 selected screening tools has been provided in Table 1.  
16  
17  
18  
19  
20  
21

### ***Participant characteristics***

22  
23 All the studies involved males and females; age ranged between 0-5 years. The smallest sample  
24  
25 size was 53 and the largest was 1945. The studies explored the following cultural contexts:  
26  
27 East Asia and Pacific (China, Mongolia, and Thailand), Europe and Central Asia (Turkey),  
28  
29 Latin America and the Caribbean (Brazil), Middle East and North Africa (Iran) South Asia  
30  
31 (Bangladesh, India) Sub-Saharan Africa (Benin, South Africa). Selection criteria used for  
32  
33 participation in those studies are stated in Supplementary Table S5.  
34  
35  
36  
37  
38  
39

### ***Study characteristics***

40  
41 All the included studies were cross-sectional in nature. Among the eighteen studies, one study  
42  
43 was conducted in the community and tertiary hospital simultaneously,[54] eight were  
44  
45 conducted in the tertiary hospital,[38, 42, 43, 46-50] five were conducted in the community,[39,  
46  
47 40, 44, 51, 55] and one study each was conducted in a nursery school setting[45] and primary  
48  
49 health care clinic setting.[52] In the remaining two studies, screening was done in the  
50  
51 community followed by a hospital-based detailed assessment in one[41] and primary health  
52  
53 care clinic-based assessment in another.[53]  
54  
55  
56  
57  
58  
59

### ***Validated screening tools***



### *The Ages and Stages Questionnaire (ASQ)*

This is a parent-completed questionnaire that could be used as a general developmental screening tool. The ASQ was designed and developed by J. Squires and D. Bricker, at the University of Oregon and can be completed in 12-18 minutes.[56] The questionnaire has 30 items focusing on five domains of child development, named gross motor, fine motor, problem-solving, communication, and personal-social. Obtaining lower scores than the cut off in any domain is considered as “screen positive”. The latest version of ASQ, ASQ-3, has 21 sets of questionnaires, appropriate for children aged 1–66 months.[57] In the study by Juneja et al., 2012; a Hindi adaptation of an older version of ASQ, (ASQ-2, which had 19 sets of questionnaires for 4 to 60 months aged children) was used in a convenience sample of 200 children divided into 4 age groups: 4, 10, 18 and 24 months, in a tertiary hospital setting.[38] Each age group consisted of 30 low risk and 20 high-risk children. High-risk status was determined by the presence of any of the following risk factors: prematurity, low birth weight, history of neonatal hospitalization, history of central nervous system infection, history of afebrile seizure, diagnosed cases of developmental disorder and chromosomal abnormalities. Children without these risk factors were treated as being in the low-risk group. Eventually, 4, 10, 18 and 24 months questionnaires of ASQ-2 were validated against “Developmental Assessment Scales for Indian Infants (DASII)”, considered as a gold standard for developmental assessment tool among Indian children.[38] The overall sensitivity and specificity of ASQ-2 for Indian children were found to be 83.3% and 75.4% respectively.

In the study by Yue et al., 2019; Chinese adaptation of ASQ-3 was used among 1831 children aged 5 to 24 months in a cluster random sample from rural China. Eventually the tool was validated against the Bayley Scales of Infant and Toddler Development-III. Overall sensitivity and specificity of ASQ-3 found to be 76.52% and 40.97%, respectively. The authors

1  
2  
3 suggested to avoid using ASQ-3 for children lower than 13 months of age as well as children  
4 whose primary caregiver aren't their mother, due to poor performance in those group of  
5 children.[39]  
6  
7  
8  
9

### 10 11 12 *American Speech-Language and Hearing Association Screening Tool (ASHA)* 13

14 The ASHA was designed and developed by the American Speech-Language and Hearing  
15 Association to screen out under-5 children for language delay in receptive and expressive  
16 language domain. There are 7 age sets consisting of 6-13 questions per age set. Cut-off score  
17 for screen positive result varies from one age set to another. In general, if a child gets more  
18 than two negative answers in any domain will be considered as "screen positive". In the study  
19 conducted by Dias et. al, 2020; 1000 under-5 children were screened for language delay during  
20 a polio vaccination campaign in Sao Paulo, Brazil by utilizing the tool. Later detailed  
21 assessment was conducted using ABFW Child Language Test. ASHA found to have excellent  
22 sensitivity and specificity (82.5% and 98.93%, respectively) against ABFW Child Language  
23 Test.[40] The authors recommended to adapt the instrument for bilingual children as well as  
24 validating it in larger sample size.  
25  
26  
27  
28  
29  
30  
31  
32  
33  
34  
35  
36  
37  
38  
39  
40  
41  
42

### 43 *Development Screening Questionnaire (DSQ)* 44

45 The DSQ was designed and developed in Bangladesh, to be administered to mothers of children  
46 from birth to 24 months of age to screen their child's neurodevelopmental status. The DSQ has  
47 24 age sets with 8 questions per set related to eight functional domains, named: gross motor,  
48 fine motor, vision; hearing, cognition, socialization, behaviour and speech.[41] Any child  
49 found to be positive on one or more functional domain is considered "screen positive". In a  
50 study conducted in urban Bangladesh, a random sample of 197 children aged 0-24 months was  
51 screened in the community with DSQ, and then a detailed developmental assessment was done  
52  
53  
54  
55  
56  
57  
58  
59  
60

1  
2  
3 in a tertiary hospital with the help of the “Rapid Neurodevelopmental Assessment” tool as the  
4 gold standard. Overall sensitivity and specificity of DSQ for under 2-year-old Bangladeshi  
5 children was found to be 47.1% and 97.2% respectively.[41] Despite moderate sensitivity, the  
6 DSQ might be advantageous for resource-poor settings due to its high specificity.  
7  
8  
9  
10  
11  
12

### 13 *Guide for Monitoring Child Development (GMCD)*

14  
15 The GMCD was designed and developed in Turkey to monitor development of 0-3.5 years old  
16 children in LMICs. The tool consists of 7 open ended questions focusing on the following  
17 domains- Expressive language and communication, Receptive language, Fine and gross motor,  
18 Social-emotional, Self-help. Children declared screened positive if they failed to demonstrate  
19 one or more age appropriate milestones. In a study conducted by Ertem et al. 2008; GMCD  
20 was validated against Bayley Scales of Infant Development (Bayley-II) in a random sample 79  
21 Turkish children of 1-24 months of age. The overall sensitivity and specificity of GMCD were  
22 found to be 88% and 93% respectively.[42]  
23  
24  
25  
26  
27  
28  
29  
30  
31  
32  
33  
34

### 35 *Infant Neurological International Battery (INFANIB)*

36  
37 The INFANIB was established by Ellison and Browning in 1985 to assess the gross motor  
38 function of children aged 0 to 18 months. The tool contains 20-items focusing on spasticity,  
39 vestibular function, head and trunk, French angles and legs.[58] In the study by Soleimani and  
40 Dadkhah, 2006; a consecutive sample of 6150 children were screened using INFANIB and  
41 classified as normal, transiently abnormal and abnormal. To validate the tool a random sample  
42 of 153 children from the above-mentioned groups were assessed by paediatric neurologists. It  
43 was found that overall sensitivity and specificity of INFANIB for Iranian children were 90%  
44 and 83% respectively.[43]  
45  
46  
47  
48  
49  
50  
51  
52  
53  
54  
55  
56

### 57 *Language Evaluation Scale Trivandrum (LEST 0-3)*

1  
2  
3 Designed and developed at the Child Development Centre of the Trivandrum Government  
4 Medical College, India, LEST (0-3) is a 33 items screening tool to screen out language delay  
5 among 0 to 3 years old children.[44] The LEST (0-3) was validated against the “Receptive-  
6 Expressive Emergent Language Scale” tool as a gold standard in a community sample of 643  
7 Indian children aged 0 to 36 months. To decide on the best possible combination, researchers  
8 considered both “one item delay” and “two items delay” as screen positive. When one item  
9 delay considered as screen positive, sensitivity and specificity of LEST (0-3) found to be 95.8%  
10 and 77.5% respectively. Similarly, when two items delay measured as screen positive, the  
11 sensitivity and specificity obtained as 66.7% and 94.8% respectively.[44] It should be noted  
12 that the original version of Receptive-Expressive Emergent Language Scale (1971) was used  
13 in this study for validation due to the lack of age-appropriate language assessment tool for  
14 language delay.

#### 15 16 17 18 19 20 21 22 23 24 25 26 27 28 29 30 31 32 *Little Developmental Coordination Disorder Questionnaire (Little DCDQ)*

33 The Little DCDQ was developed by Rithman and colleagues in Canada to assess gross motor  
34 and fine motor function of children between 3 to 5 years of age. It is a parent-reported  
35 questionnaire with 15 items under three main components, control during execution, fine motor  
36 execution and overall coordination.[45] The Little DCDQ was validated against the Movement  
37 Assessment Battery for Children-2 as a gold standard in a group of 53 South African pre-  
38 schoolers between 3 to 5 years of age, with Afrikaans, Tswana or English speaking parents.[45]  
39 With 57.14% sensitivity and 81.25% specificity, Little DCDQ had the potential to be used in  
40 South African culture, however, some adjustments would be required.

#### 41 42 43 44 45 46 47 48 49 50 51 52 53 *Lucknow Development Screen (LDS)*

54 The LDS was developed in CSM Medical University, Lucknow, India, using selected  
55 milestones from Baroda Development Screening Test. It is a 27 items chart format tool,  
56  
57  
58  
59  
60

1  
2  
3 covering four domains namely motor, mental, language and social. Suitable for children aged  
4  
5 0 to 24 months. The LDS is said to be easily administrable by interviewing parents or  
6  
7 caregiver.[46] In a study conducted in India, the LDS tool was validated against the DASII and  
8  
9 the Vineland Social Maturity Scale. They administered the tool to mothers of a sample of 142  
10  
11 children, aged between 6 to 24 months, attending Paediatric Outpatients or Neurology Clinic  
12  
13 of CSM Medical University, Lucknow, India. The screening tool was translated into Hindi for  
14  
15 easy understanding and administration. For 3 children among the sample size of 142, Vineland  
16  
17 Social Maturity scale was used as a gold standard, as DASII couldn't be applied to them. It is  
18  
19 claimed that the LDS has a great potential to be used as a community screening tool among  
20  
21 Indian children, with an overall sensitivity of 95.9% and specificity 73.1%.[46]  
22  
23  
24  
25

#### 26 27 *Mongolian Rapid Baby Scale (MORBAS)*

28  
29 The MORBAS is a written developmental screening test, designed and developed in Mongolia.  
30  
31 It has 161 items arranged under seven developmental domains, namely gross motor, fine motor,  
32  
33 cognitive, expressive language, receptive language, social-emotional and adaptive behaviour.  
34  
35 The tool is suitable for children aged 0 to 42 months.[47] In a study conducted in Mongolia,  
36  
37 MORBAS was administered in a convenience sample of 150 Mongolian children aged 0 to 42  
38  
39 months and thus validated against the Bayley Scales of Infant and Toddler Development-III.  
40  
41 With sensitivity 81.8% and specificity 52.3%,[47] MORBAS could be useful in the long run  
42  
43 to screen out children for early intervention and rehabilitation.  
44  
45  
46  
47

#### 48 49 *New Delhi – Development Screening Questionnaire (ND-DSQ)*

50  
51 The ND-DSQ was developed by Jain and colleagues, at Chacha Nehru Bal Chikitsalaya, a  
52  
53 tertiary hospital of northern India. ND-DSQ has 20 items, two age sets (9 months and 18  
54  
55 months) and applicable for children aged 9 to 18 months.[48] The items mentioned were  
56  
57 milestone specific. Thus, no explicit mention of the developmental domains was found. In the  
58  
59  
60

1  
2  
3 study by Jain et al., 2017; ND-DSQ was validated against DASII in a convenience sample of  
4  
5 200 children aged 9 and 18 months (with 100 children per age group). It was established that  
6  
7 the 9-month questionnaire was 100% sensitive and 87.2% specific for Indian children.  
8  
9 Correspondingly, the 18 months questionnaire was validated with 91.4% sensitivity and 88.7%  
10  
11 specificity.[48] As a newly developed tool, the ND-DSQ is promising to be useful for Indian  
12  
13 and similar cultural settings.  
14  
15

### 16 17 18 *Parent Evaluation of Developmental Status (PEDS)*

19  
20 This tool was developed in 1997 by F. P. Glascoe at Tennessee, USA.[59] It is the only  
21  
22 screening tool available to date that addresses parent's concern about children's development  
23  
24 in the following domains: gross motor, fine motor, cognitive, expressive language, receptive  
25  
26 language, behaviour, social-emotional, self-help, school and other.[60] It has ten open-ended  
27  
28 questions under ten areas of parental concerns, applicable for children aged 0 to 8 years. The  
29  
30 other category allows parents to express concerns not already addressed under previous  
31  
32 categories. This unique property makes PEDS unique as a developmental screening tool. In  
33  
34 PEDS, parental concerns are labelled as "predictive" (significant) and "non-predictive" (non-  
35  
36 significant). Thus, children are screened as low risk, moderate risk and high-risk group if they  
37  
38 have no or non-predictive concerns, one predictive concern and two predictive concerns,  
39  
40 respectively.[49]  
41  
42  
43  
44  
45

46  
47 In the study by Chunuwan et al., 2016; the PEDS- Thai was validated against the  
48  
49 "Parent Evaluation of Developmental Status: Developmental Milestones, Assessment Level"  
50  
51 in a tertiary hospital. A convenience sample of 266 children of 9, 18 and 30 months of age was  
52  
53 selected. Screen positive children were assembled as "high risk" ( $\geq 2$  significant concerns) and  
54  
55 "moderate or high risk" ( $\geq 1$  significant concern) group. Sensitivity and specificity of PEDS  
56  
57 against Parent Evaluation of Developmental Status: Developmental Milestones, Assessment  
58  
59  
60

1  
2  
3 Level for the high-risk group was established as 27.7% and 93.0%, respectively. For moderate  
4 or high-risk group, the tool was 67.7% sensitive and 60.7% specific.[49] In order to avoid  
5 unnecessary/over-referral, the authors suggested to practice second stage evaluation (using  
6 Parent Evaluation of Developmental Status: Developmental Milestones, ASQ, Denver-II etc.  
7 tools) alongside/after PEDS screening.  
8  
9  
10  
11  
12  
13  
14  
15

16 In another study by Wantanakorn et al., 2016; they validated the PEDS- Thai against  
17 the Mullen Scales of Early Learning tool as a gold standard in a convenience sample of 137  
18 children aged 18 to 36 months in another tertiary hospital. It was found that the PEDS-Thai is  
19 a promising tool for Thai cultural backgrounds with overall sensitivity of 92.8% and specificity  
20 49.2%.[50] According to the authors, “the relatively low specificity of PEDS seen here may be  
21 because of the excessive concern of parents regarding their child’s development, especially  
22 who are in relatively high socioeconomic status”. The selection bias of participants was  
23 mentioned as the major limitation of the study. Thus, they advised further evaluation of the  
24 diagnostic performances of the tool using a representative sample of the population.  
25  
26  
27  
28  
29  
30  
31  
32  
33  
34  
35  
36

### 37 *Rapid Pre-screening Denver Questionnaire (R-PDQ)*

38  
39 The R-PDQ is a general developmental screening tool covering four developmental domains:  
40 gross motor, fine motor activity, personal-social and language.[51] It has four age sets  
41 applicable for children aged 0 to 6 years: 0 to 9 months, 9 to 24 months, 2 to 4 years and 4 to  
42 6 years. Each questionnaire contained 25 items. To score a child, the responding person had  
43 to keep answering the questions until there were three negative responses under a specific  
44 domain. In the study by Awasthi et al., 1997; the 2 to 4 years questionnaire of R-PDQ was  
45 validated against the Denver Developmental Screening Test. The study participants were  
46 randomly selected 126 children living in urban slums of Lucknow, India. To validate the tool,  
47 when a delay in more than one domain was considered as the cut-off, the tool was revealed to  
48  
49  
50  
51  
52  
53  
54  
55  
56  
57  
58  
59  
60



1  
2  
3 be 100% sensitive and 7.8% specific. Similarly, when a delay in more than two domains was  
4 considered as the cut-off, the sensitivity and specificity were found to be 18.2% and 42.6%,  
5 respectively.[51] Inconvenient validity and high referral rate compared to US children were  
6 explained by the presence of various “difficult to interpret” questions and Denver  
7 Developmental Screening Test being an unsuitable gold standard for R-PDQ.  
8  
9

#### 10 11 12 13 14 15 16 *Road to Health Booklet Developmental Checklist (RTHB-DC)*

17  
18 The RTHB-DC was prepared as an integrated part of The Road to Health Booklet, the revised  
19 version of which was introduced in October 2010. RTHB-DC is the only developmental  
20 surveillance and screening tool, currently implemented nationally in South Africa. The tool  
21 consists of 21 questions covering gross motor, fine motor, communication, vision, and hearing  
22 domains. The checklist is applicable for children aged 14 weeks to 6 years.[61] In the study by  
23 Linde et al., 2015; RTHB-DC was validated against PEDS and Parent Evaluation of  
24 Developmental Status: Developmental Milestones tools. The sample size was 201, consisting  
25 of children aged 6 to 12 months old. In a primary health care clinic setting in South Africa, the  
26 sensitivity of the tool was found to be very low, i.e. 25% compared to reasonably high  
27 specificity of 91%.[52] Further development of the tool has been suggested by the authors  
28 incorporating consistent age gaps and inclusion of all developmental domains.  
29  
30  
31  
32  
33  
34  
35  
36  
37  
38  
39  
40  
41  
42  
43

#### 44 45 46 47 48 49 50 51 52 53 54 55 56 57 58 59 60 *Ten Questions Screening Instrument (TQSI)*

The TQSI Screening Instrument was developed in 1984 as part of a pilot study conducted by  
the University of Columbia, USA, for use in resource-poor countries.[62, 63] TQSI is a parent  
reported tool comprising of ten questions addressing motor, cognitive, vision, hearing, and  
seizure status. A child is considered screen positive if any of the questions are found to be  
positive. The tool is appropriate for children aged 2 to 9 years. In a study by Koura et al., 2013;  
the TQSI was validated against the Mullen Scales of Early Learning in a sample of 357 children



1  
2  
3 aged 12 months.[53] The participants were the offspring of the mothers who were enrolled in  
4 the “Malaria in Pregnancy Preventive Alternative Drugs” trial. To adjust the tool for that age  
5  
6 the “Malaria in Pregnancy Preventive Alternative Drugs” trial. To adjust the tool for that age  
7  
8 group, researchers had excluded the language domain which is applicable for children above 2  
9  
10 years. In that study, screening was done in the community followed by a detailed assessment  
11  
12 done in the health centre. It was found that the overall tool had reasonably high sensitivity  
13  
14 (81%) but poor specificity (31%) for children of Benin. This is compared to the 76.5%  
15  
16 sensitivity and 75.7% specificity where only the motor domain was considered.[53] Mullen  
17  
18 Scales of Early Learning was used due to lack of a gold standard assessment tool for the  
19  
20 Beninese population. The result suggests that the TQSI tool might be useful for resource-poor  
21  
22 settings to screen out moderate to severe delay in motor function.  
23  
24  
25  
26

#### 27 *Trivandrum Developmental Screening Chart (TDSC)*

28  
29 The TDSC was designed and developed by Nair and colleagues in 1991 in Child Development  
30  
31 Center, Kerala, India. The chart contains 17 items under four developmental domains- mental,  
32  
33 motor, vision and hearing; applicable for children under two years of age.[54] If a child fails  
34  
35 to achieve any item appropriate for his chronological age, considered as screened positive. In  
36  
37 a study conducted by Nair et al. 1991; TDSC was validated against Denver Developmental  
38  
39 Screening Test (DDST) simultaneously in community as well as hospital settings in a cluster  
40  
41 random sample of 1945 Indian children aged less than two years. Overall sensitivity and  
42  
43 specificity of TDSC found to be 66.7% and 78.8%, respectively.[54] The authors  
44  
45 recommended to utilize the chart for mass screening of developmental delay among under-2  
46  
47 children in resource poor settings.  
48  
49  
50  
51  
52  
53

#### 54 *Woodside Screening Technique (WSST)*

55  
56 The WSST was designed and developed in Glasgow, Scotland in the year 1976. The tool  
57  
58 consists of 70 items covering social, hearing and language, vision and fine motor, and gross  
59  
60

1  
2  
3 motor domains, suitable for children under 4 years of age.[55] In a study conducted by Gupta  
4 and Patel, 1991; WSST was validated against Gesell's Developmental Schedules (GDS) in a  
5 random sample of 619 children aged 6 weeks-2 years from Jabalpur, India. Overall sensitivity  
6 and specificity of WSST found to be 83% and 88%, respectively.[55]  
7  
8  
9  
10  
11  
12  
13

14 The major findings of this systematic review are presented in Table 2. We have classified the  
15 eligible tools into two broad categories- "Parents/ Caregiver Reported Tools" and "Direct Child  
16 Testing/ Observation Tools". The tools/ studies which were not included in this review as they  
17 did not meet the selection criteria, were enlisted along with the reasons for rejection in  
18 Supplementary Table S6.  
19  
20  
21  
22  
23  
24  
25  
26  
27

## 28 **Discussion**

29 To the best of our knowledge, this is the first systematic review which attempts to find the  
30 available screening tools for early identification of children with developmental delay in  
31 LMICs. Although some systematic reviews were found who considered developmental  
32 assessment tools requiring professional experts with a special office setup,[64] screening  
33 neurodevelopmental disability irrespective of age limit and diagnosis (e.g. Developmental  
34 Delay, Global Developmental Delay, Cerebral Palsy, Autism Spectrum Disorder, Attention  
35 Deficit Hyperactivity Disorder, Epilepsy, etc.),[65] or reflected high-income country  
36 context.[8] We have also observed a study in which both screening and assessment tools have  
37 been systematically rated for accuracy and feasibility to use in LMICs.[30] Where, information  
38 was significantly dependent to World Bank's toolkit and inventory on early child development  
39 tools,[66] rather than being obtained from systematic search through databases. In contrast, the  
40 purpose of this review was to systematically look for the available studies where screening  
41 tools were used exclusively for early identification (limited to children under 5 years of age)  
42  
43  
44  
45  
46  
47  
48  
49  
50  
51  
52  
53  
54  
55  
56  
57  
58  
59  
60

1  
2  
3 of developmental delay in the LMICs region where all types of study settings (i.e. from  
4 household to health facilities) were addressed in order to go for early intervention and  
5 rehabilitation of the screened cases. Therefore, the unique contribution of this review is to be  
6 able to report those screening tools exclusively designed for screening of developmental delay  
7 at the earliest possible time in both single and multiple domains.  
8  
9  
10  
11  
12  
13  
14  
15  
16

### 17 *Research gaps and future directions*

18  
19 Several research gaps have been identified in the reported studies. Primarily, there was a lack  
20 of standard terminologies to indicate the developmental domains. The examples of  
21 synonymous domain names are as follows: (i) **cognitive**: cognition, cognitive, global, mental,  
22 problem solving, etc.;[38, 39, 41, 46, 47, 49, 50, 53, 54] (ii) **language**: communication,  
23 expressive communication, expressive language, language, receptive communication,  
24 receptive language, speech, speech and language, etc.;[38- 42, 44, 46, 47, 49-51] (iii) **psycho-**  
25 **social**: adaptive behaviour, behaviour, personal-social, self-help, social, social-emotional,  
26 socialization, etc.[38, 39, 41, 42, 46, 47, 49-51, 55] Apart from those, few researchers  
27 incorporated unconventional developmental domains in their tools, such as: hearing, school,  
28 seizure, vision, etc.[49, 50, 52-55] Secondly, there was a lack of standard proxy measures to  
29 define the screen-positive cases. Currently available examples of proxy measures are as  
30 follows: overall scores,[38, 39], number of negative answers,[40] number of milestones,[42]  
31 number of items,[44, 54] number of functional domains,[51] number of significant  
32 concerns[49, 50] etc. These two factors together, often make the screening results  
33 incomprehensible to health professionals who are not familiar with the tool in question.  
34 Moreover, it is neither possible to convert nor compare the test scores between separate  
35 screening tools, for better understanding. Many of the tools developed in English speaking  
36 countries might not be suitable for non-English speaking countries due to different socio-  
37  
38  
39  
40  
41  
42  
43  
44  
45  
46  
47  
48  
49  
50  
51  
52  
53  
54  
55  
56  
57  
58  
59  
60

1  
2  
3 cultural backgrounds and problematic translation.[67-69] These issues might become a barrier  
4  
5 for early identification and rehabilitation of developmental delay from the service providers'  
6  
7 end. Lastly, several studies reported that the expected sensitivity-specificity was not achieved  
8  
9 due to the lack of validated gold standard assessment tool for the particular culture in  
10  
11 question.[44, 51, 53] To the best of our knowledge, there is a lack of WHO's centralized  
12  
13 initiatives, as well as no Global regulatory body is currently working in this regard. Majority  
14  
15 of the developmental assessment tools found in this review were established for high income  
16  
17 countries (BSID, DDST, REELS, GDS, MABC-2, etc). Only three of them were designed and  
18  
19 developed in LMICs (ABFW, DAASII and RNDA). None of the studies using assessment tools  
20  
21 designed for high income countries, provided information on cultural adaptation. However, in  
22  
23 a study conducted by Parveen et al., 2014, took the initiative to culturally adapt Bayley Scales  
24  
25 of Infant Development- Second Edition (BSID-II) items for Bangladeshi infants.[70] Example  
26  
27 of culture-sensitive BSID-II items for Bangladeshi infants are presented in Supplementary  
28  
29 Table S7. Future research work should focus on developing or adapting developmental  
30  
31 assessment tools to be efficiently used as gold standard for LMICs.  
32  
33  
34  
35  
36  
37  
38  
39

40 In this systematic review, we had observed East Asian and Pacific, European and  
41  
42 Central Asian, Latin American and the Caribbean, Middle East and North African, South Asian  
43  
44 and Sub-Saharan cultural contexts among the eligible studies. Although, the number of  
45  
46 countries engaged in similar studies are alarmingly low compared to the number of LMICs, in  
47  
48 total.[34] This reveals the urgent need for valid and culturally sensitive screening tools for the  
49  
50 rest of the LMICs. Among the sixteen eligible screening tools, half of them were developed in  
51  
52 LMICs (DSQ, GMCD, LEST 0-3, LDS, MORBAS, ND-DSQ, RTHB-DC and TDSC) and  
53  
54 another half were developed in high-income countries (ASHA, ASQ, INFANIB, Little DCDQ,  
55  
56 PEDS, R-PDQ, TQSI and WSST). We have found the majority of the culturally sensitive tools  
57  
58  
59  
60

1  
2  
3 translated in their native language. Still, for multilingual countries like Benin, Ethiopia, India,  
4  
5 etc. the necessity of translating the tools in regional languages, remains high. None of the  
6  
7 LMICs has been found to be engaged in collecting nationally representative longitudinal data  
8  
9 on the prevalence of developmental delay, which is vital for disease projection. The gathering  
10  
11 of nationally representative prevalence data in linguistic, social, ethnic and cultural subgroups  
12  
13 would allow the validation of customized developmental screening tools according to disease  
14  
15 burden. Greater customization to respect the diverse cultural norms[71] of a particular  
16  
17 community, will also most likely result in greater acceptance[72, 73] of the screening process,  
18  
19 which is crucial for the success of a large-scale surveillance program.  
20  
21  
22  
23  
24  
25

26 While planning surveillance program for resource-poor settings, additional factors  
27  
28 should be kept in mind. According to Gupta et al 1991, lack of furniture as well as staircase at  
29  
30 home often results in exhibition of delayed gross motor skills due to lack of practice. Similarly,  
31  
32 being heavily dependent on recall method is also problematic, as it is burdensome for parents  
33  
34 with no or minimal education.[55] To overcome these issues, Ertem et al 2008 suggested to  
35  
36 target very young children for developmental screening/ surveillance. As, earlier we can screen  
37  
38 the children, higher the chances of attaining similar milestones at similar ages despite of  
39  
40 cultural differences.[42]  
41  
42  
43  
44  
45  
46

### 47 ***Promising quasi-validated tool***

48  
49 We have found quite a few promising screening tools suitable for early identification of  
50  
51 developmental delay. Unfortunately, could not include them as the studies did not fulfil our  
52  
53 selection criteria. One of the quasi-validated tools is Neonatal Oral Motor Assessment Scale  
54  
55 (NOMAS). NOMAS is a commonly used neonatal feeding evaluation which is developed by  
56  
57 Marjorie Meyer Palmer in 1985. The NOMAS is the only available neonatal feeding evaluation  
58  
59  
60

1  
2  
3 that can be used for the term or preterm infants and for breast or bottle-fed infants. This is a  
4  
5 28-items observational checklist for tongue and jaw movement. Following the observation of  
6  
7 non-nutritive sucking, oral feeding for the first 2 minutes are evaluated.[74] In a study  
8  
9 conducted in Taiwan by Tsai et al., 2010, the predictive validity of NOMAS was assessed  
10  
11 against BSID- II in a group of 27 preterm infants without brain lesion to demonstrate  
12  
13 neurodevelopmental outcome at 6 months and 12 months of corrected age.[75]  
14  
15  
16  
17  
18

### 19 ***Suitable screening tools for primary health care setting***

20  
21 Out of the ten screening tools, we would recommend two screening tools feasible enough to be  
22  
23 used for developmental surveillance at the primary health care setting. They are ASQ and  
24  
25 PEDS. Both are parent-completed screening tools. Their strong points are: PEDS requires bare  
26  
27 minimum additional materials and for ASQ, it provides 21 sets of questionnaires for 21 age  
28  
29 groups. Besides, both are very easy to administer. We can easily build up a surveillance system  
30  
31 using these tools. Where health workers can carry out screening at households using single  
32  
33 PEDS questionnaire for all, then screened positive cases can be referred to the primary health  
34  
35 care centres to conduct secondary screening with age specific ASQ questionnaire. Basic  
36  
37 properties of ASQ and PEDS are stated in the Supplementary Table S8. (adopted from [76])  
38  
39  
40  
41  
42  
43  
44

### 45 ***Limitations***

46  
47 Despite our best efforts, there were several limitations to this study. This study was limited to  
48  
49 articles published in the English language only due to constraints in resources and time. In this  
50  
51 study, we exclude children who had developmental delay due to HIV exposure or autism  
52  
53 spectrum disorder or other behavioural disorders. Though these children also suffer from  
54  
55 varying degrees of developmental delay, the pathogenesis behind those delays is closely related  
56  
57 to the diseases.[77, 78] Moreover, conventionally it takes more than two years of age to  
58  
59  
60

1  
2  
3 diagnose a child with autism spectrum disorder and hence the age range of currently available  
4 autism screening tools starts later than general developmental screening tools (e.g. Modified  
5 Checklist for Autism in Toddlers: 16-30 months; where ASQ-3: 1-66 months). This conflicts  
6 with the objectives of our study to ensure early diagnosis of developmental delay. So, with  
7 respect to other neurodevelopmental disorders, we preferred to focus exclusively on  
8 developmental delay in our study. Though it is very difficult to rule out the possibility of  
9 undiagnosed cases of autism being included among all the developmentally delayed children,  
10 as none of the studies reported so. Moreover, we were unable to critically appraise the available  
11 screening tools in terms of diagnostic accuracy due to the unavailability of the necessary  
12 information. Which is quite reasonable as Boggs and her colleagues also reported that authors  
13 tend to provide validity information very briefly and evidence on accuracy are most difficult  
14 to obtain.[30] We are hopeful to conduct subsequent systematic review and meta-analysis on  
15 geographical region/ country/ domain specific screening tools and their psychometric  
16 properties based on the information obtained from this study.

### 37 ***Recommendations***

- 38 (1) A global regulatory body should be formed to standardize the terminologies and cut-  
39 off scores of available and future screening tools to improve comprehensiveness and  
40 interpretation of test results, simultaneously ensuring better correlation between results  
41 obtained from different screening tools.
- 42 (2) Future research work should focus on revising existing screening as well as assessment  
43 tools in different ethnic and cultural perspectives and validate them in the respective  
44 normative sample as well as conducting systematic reviews based on individual  
45 screening tools in different cultural settings.

1  
2  
3 (3) We also recommend ensuring nationwide routine developmental surveillance  
4 programs in LMICs using culturally sensitive tools to identify and treat developmental  
5 delay as early as possible. Developmental screening at the time of routine  
6 immunization schedule could be a possible way to integrate this with an existing  
7 successful public health program in LMICs. This timing would be both cost-effective  
8 and maximize response rates.  
9  
10  
11  
12  
13  
14  
15  
16  
17  
18

### 19 *Conclusions*

20  
21 Developmental screening is required for early diagnosis of developmental delays in infants and  
22 young children in LMICs to enable early intervention and rehabilitation. In order to do this,  
23 culturally-sensitive, easy to administer screening tools with good psychometric properties are  
24 needed. We observed that there is a lack of culturally sensitive developmental screening tools  
25 validated among under 5 children in LMICs. However, we have found eight screening tools  
26 with relatively high sensitivity and specificity. We also identified key research gaps and  
27 consequently proposed a few recommendations for overcoming those gaps. These include (but  
28 not limited to) global standardization of terminologies and cut-off scores for screening tools,  
29 revising existing tools according to diverse cultural norms and validating them in the respective  
30 normative sample and finally ensuring nationwide routine developmental surveillance  
31 programs in LMICs using culturally sensitive tools. To execute so, we have suggested a health  
32 worker centred screening system consisting ASQ and PEDS. Therefore, future research should  
33 focus on enabling the caregivers, health workers, and therapists to assist in children with  
34 developmental delays in LMICs to reach their full developmental potential.  
35  
36  
37  
38  
39  
40  
41  
42  
43  
44  
45  
46  
47  
48  
49  
50  
51  
52  
53  
54  
55

56 **Declaration of interest:** This manuscript is new and entirely original, has not been  
57 copyrighted, published, submitted, or accepted for publication elsewhere. All authors have  
58 given their consent and agreed to submit to your journal. The authors have no conflict of  
59 interest.  
60



1  
2  
3  
4  
5  
6  
7  
8  
9  
10  
**Acknowledgments:** The authors acknowledge the wise feedback and invaluable suggestions received from Prof. Dr. M. Shafiqur Rahman, Institute of Statistical Research and Training, University of Dhaka and Prof. Dr. Naila Zaman Khan, Department of Paediatric Neuroscience, Dhaka Shishu (Children's) Hospital, Bangladesh Institute of Child Health.

11  
12  
13  
14  
15  
16  
17  
18  
19  
20  
21  
22  
23  
24  
**Author Contributions:** This study was conceived and designed by Gulam Khandaker and Tasnuva Faruk. Catherine King developed the search strategy. Three authors conducted the database search (phase 1 up to March 2018: Catherine King; phase 2 up to July 2020: Israt Jahan and Md Kafiul Islam). Three authors (Tasnuva Faruk, Israt Jahan and Md Kafiul Islam) independently screened the title and abstracts. Tasnuva Faruk, Md Kafiul Islam and Gulam Khandaker independently performed the full-text review of the screened articles. During each step of the study selection process, disagreements were resolved through discussion. Tasnuva Faruk and Md Kafiul Islam wrote the first draft with input from Gulam Khandaker, Nadia Badawi, Kamran ul Baset, and Mohammad Muhit. All authors reviewed all drafts and approved the final submitted manuscript.

25  
26  
27  
28  
**Funding:** This project was not externally funded. Study activities were supported by the Asian Institute of Disability and Development (AIDD), University of South Asia, Bangladesh.

29  
30  
**Competing interests:** The authors have no conflict of interest.

31  
32  
**Patient consent for publication:** Not required.

33  
34  
35  
36  
**Ethics approval:** As this systematic review did not directly involve human or animal subjects, or access to medical records; ethical approval was not required.

37  
38  
**Provenance and peer review:** Not commissioned; externally peer reviewed.

39  
40  
**Data sharing statement:** No original data were generated for this study.

41  
42  
43  
44  
45  
46  
47  
48  
49  
50  
51  
52  
53  
54  
55  
56  
57  
58  
59  
60  
**Open access:** This is an open access article distributed in accordance with the Creative Commons Attribution Non Commercial (CC BY-NC 4.0) license, which permits others to distribute, remix, adapt, build upon this work non-commercially, and license their derivative works on different terms, provided the original work is properly cited, appropriate credit is given, any changes made indicated, and the use is non-commercial. See: <http://creativecommons.org/licenses/by-nc/4.0/>.

## References

1. Developmental delay [Internet]. Med.umich.edu. 2010 [cited 5 July 2018]. Available from: <http://www.med.umich.edu/yourchild/topics/devdel.htm>.
2. International classification of functioning, disability and health. Geneva: *World Health Organization*; 2001.
3. Fernald L, Kariger P, Engle P et al. Examining early child development in low-income countries: a toolkit for the assessment of children in the first five years of life [Internet]. *The World Bank*; 2009 [cited 1 January 2019]. Available from: <https://openknowledge.worldbank.org/bitstream/handle/10986/28107/NonAsciiFileName0.pdf?sequence=1>.
4. Walker S, Wachs T, Meeks Gardner J et al. Child development: risk factors for adverse outcomes in developing countries. *The Lancet*. 2007;369:145-157.
5. Early childhood development and disability: a discussion paper [Internet]. Apps.who.int. 2012 [cited 13 February 2019]. Available from: [https://apps.who.int/iris/bitstream/handle/10665/75355/9789241504065\\_eng.pdf;sequence=1](https://apps.who.int/iris/bitstream/handle/10665/75355/9789241504065_eng.pdf;sequence=1).
6. What is a developmental delay? [Internet]. *House with No Steps*. 2018 [cited 15 May 2019]. Available from: <https://www.hwns.com.au/disability-services/childrens-services/early-childhood-intervention/what-is-a-developmental-delay-or-disability/>.
7. About developmental disabilities [Internet]. Institute of Community Integration, University of Minnesota. 2019 [cited 15 May 2019]. Available from: <https://ici.umn.edu/welcome/definition.html>.
8. Warren R, Kenny M, Bennett T et al. Screening for developmental delay among children aged 1-4 years: a systematic review. *CMAJ Open*. 2016;4:E20-E27.
9. Sim F, Thompson L, Marryat L et al. Predictive validity of preschool screening tools for language and behavioural difficulties: A PRISMA systematic review. *PLOS ONE* 2019;14:e0211409.
10. Sices L. Developmental screening in primary care: the effectiveness of current practice and recommendations for improvement [Internet]. 2007 [cited 15 May 2018]. Available from: <https://core.ac.uk/download/pdf/71350769.pdf>.
11. Newborn death and illness [Internet]. *WHO*. 2011 [cited 5 July 2018]. Available from: [https://www.who.int/pmnch/media/press\\_materials/fs/fs\\_newbornddeath\\_illness/en](https://www.who.int/pmnch/media/press_materials/fs/fs_newbornddeath_illness/en).
12. Neonatal mortality - UNICEF Data [Internet]. *UNICEF Data*. 2018 [cited 10 July 2018]. Available from: <https://data.unicef.org/topic/child-survival/neonatal-mortality/>.
13. Mathers C, Loncar D. Projections of global mortality and burden of disease from 2002 to 2030. *PLoS Medicine*. 2006;3:e442.
14. Grantham-McGregor S, Cheung Y, Cueto S et al. Developmental potential in the first 5 years for children in developing countries. *The Lancet*. 2007;369:60-70. .
15. Hasan A, Leslie R, Nakajima N. How community-based early childhood programs can impact child development [Internet]. *World Bank Blogs*. 2017 [cited 10 July 2018]. Available from: <http://blogs.worldbank.org/education/how-community-based-early-childhood-programs-can-impact-child-development>.
16. Scherzer A, Chhagan M, Kauchali S et al. Global perspective on early diagnosis and intervention for children with developmental delays and disabilities. *Dev Med Child Neurol*. 2012;54:1079-1084.
17. Ofek-Shlomai N, Berger I. Inflammatory injury to the neonatal brain- what can we do?. *Front Pediatr*. 2014;2.
18. Lin C, Muo C, Chang Y et al. Change in prevalence status for children with developmental delay in Taiwan: a nationwide population-based retrospective study. *Neuropsychiatr Dis Treat*. 2015;11:1541-1547.
19. Wang S, Hsu S, Chen L. The impact on neonatal mortality of shifting childbirth services among levels of hospitals: Taiwan's experience. *BMC Health Serv Res*. 2009;9:94.
20. Developmental Monitoring and Screening [Internet]. Centers for Disease Control and Prevention. 2020 [cited 12 Oct 2020]. Available from: <https://www.cdc.gov/ncbddd/childdevelopment/screening.html>.
21. Committee on Children with Disabilities. Developmental surveillance and screening of infants and young children. *Pediatrics*. 2001 Jul 1;108(1):192-5.

22. Sabanathan S, Wills B, Gladstone M. Child development assessment tools in low-income and middle-income countries: how can we use them more appropriately?. *Arch Dis Child*. 2015;100:482-488.
23. Glascoe F, Cairney J. Best practices in test construction for developmental-behavioral measures: quality standards for reviewers and researchers. Follow-Up for NICU Graduates. *Springer*; 2018. p. 255-279.
24. Fischer V, Servili C, Morris J et al. Developmental screening tools: feasibility of use at primary health level in low and middle-income settings. *Neuropsychiatr Enfance Adolesc*. 2012;60:S304.
25. Scherzer A. Experience in cambodia with the use of a culturally relevant developmental milestone chart for children in low- and middle-income countries. *J Policy Pract Intellect Disabil*. 2009;6:287-292.
26. Soltani S, Takian A, Sari A et al. Cultural barriers in access to healthcare services for people with disability in Iran: A qualitative study. *Med. j. Islam. Repub. Iran*. 2017;31:293-299. .
27. Baker D, Miller E, Dang M et al. Developing culturally responsive approaches with southeast asian american families experiencing developmental disabilities. *Pediatrics*. 2010;126:S146-S150. .
28. Baxter C, Mahoney W. Developmental Disability Across Cultures [Internet]. Caring for kids new to canada. 2018 [cited 15 May 2019]. Available from: <https://www.kidsnewtocanada.ca/mental-health/developmental-disability/>.
29. Gladstone M, Lancaster G, Jones A et al. Can western developmental screening tools be modified for use in a rural Malawian setting?. *Arch Dis Child*. 2008;93:23-29.
30. Boggs D, Milner K, Chandna J et al. Rating early child development outcome measurement tools for routine health programme use. *Arch Dis Child*. 2019;104:S22-S33.
31. Marlow M, Servili C, Tomlinson M. A review of screening tools for the identification of autism spectrum disorders and developmental delay in infants and young children: recommendations for use in low- and middle-income countries. *Autism Res* 2019;12:176-199.
32. Richards M, Mossey J, Robins D. Parents' Concerns as They Relate to Their Child's Development and Later Diagnosis of Autism Spectrum Disorder. *J Dev Behav Pediatr* 2016;37:532-540.
33. New World Bank country classifications by income level: 2020-2021. World Bank Blogs. 2020.<https://blogs.worldbank.org/opendata/new-world-bank-country-classifications-income-level-2020-2021> (accessed 13 Jul 2020).
34. World Bank Country and Lending Groups – World Bank Data Help Desk. Datahelpdesk.worldbank.org. 2020.<https://datahelpdesk.worldbank.org/knowledgebase/articles/906519-world-bank-country-and-lending-groups> (accessed 13 Jul 2020).
35. Moher D, Liberati A, Tetzlaff J et al. Preferred reporting items for systematic reviews and meta-analyses: The PRISMA Statement. *Ann Intern Med*. 2009;151:264-269
36. Whiting P, Rutjes A, Westwood M et al. QUADAS-2: a revised tool for the quality assessment of diagnostic accuracy studies. *Ann Intern Med*. 2011;155:529-536.
37. Modesti P, Reboldi G, Cappuccio F et al. Differences in blood pressure in europe: a systematic review and meta-analysis. *PLOS ONE*. 2016;11:e0147601.
38. Juneja M, Mohanty M, Jain R et al. Ages and stages questionnaire as a screening tool for developmental delay in Indian children. *Indian Pediatr*. 2011;49:457-461. .
39. Yue A, Jiang Q, Wang B et al. Concurrent validity of the Ages and Stages Questionnaire and the Bayley Scales of Infant Development III in China. *PLOS ONE* 2019;14:e0221675.
40. Dias D, Rondon-Melo S, Molini-Avejonas D. Sensitivity and specificity of a low-cost screening protocol for identifying children at risk for language disorders. *Clinics* 2020;75.
41. Khan N, Muslima H, Shilpi A et al. Validation of a home-based neurodevelopmental screening tool for under 2-year-old children in Bangladesh. *Child Care Health Dev*. 2012;39:643-650
42. Ertem I, Dogan D, Gok C et al. A Guide for Monitoring Child Development in Low- and Middle-Income Countries. *Pediatrics* 2008;121:e581-e589.
43. Soleimani F, Dadkhah A. Validity and reliability of infant neurological international battery for detection of gross motor developmental delay in Iran. *Child Care Health Dev*. 2007;33:262-265. .
44. Nair M, Harikumar Nair G, Mini A et al. Development and validation of language evaluation scale trivandrum for children aged 0–3 years — LEST (0–3). *Indian Pediatr*. 2013;50:463-467.
45. Venter A, Pienaar A, Coetzee D. Suitability of the 'Little DCDQ' for the identification of DCD in a selected group of 3–5-year-old South African children. *Early Child Dev Care*. 2015;185:1359-1371.

- 1
  - 2
  - 3
  - 4
  - 5
  - 6
  - 7
  - 8
  - 9
  - 10
  - 11
  - 12
  - 13
  - 14
  - 15
  - 16
  - 17
  - 18
  - 19
  - 20
  - 21
  - 22
  - 23
  - 24
  - 25
  - 26
  - 27
  - 28
  - 29
  - 30
  - 31
  - 32
  - 33
  - 34
  - 35
  - 36
  - 37
  - 38
  - 39
  - 40
  - 41
  - 42
  - 43
  - 44
  - 45
  - 46
  - 47
  - 48
  - 49
  - 50
  - 51
  - 52
  - 53
  - 54
  - 55
  - 56
  - 57
  - 58
  - 59
  - 60
46. Bhave A, Bhargava R, Kumar R. Development and validation of a new Lucknow development screen for indian children aged 6 months to 2 years. *J Child Neurol*. 2009;25:57-60
47. Dagvadorj A, Takehara K, Bavuusuren B et al. The quick and easy Mongolian rapid baby scale shows good concurrent validity and sensitivity. *Acta Paediatr*. 2015;104:e94-e99
48. Jain R, Arora A, Anand R et al. Designing and validation of a Hindi-language parent self-report developmental screening tool. *Indian Pediatr*. 2017;54:550-555.
49. Chunsuwan I, Hansakunachai T, Pornsamrit S. Parent evaluation of developmental status (PEDS) in screening: The Thai experience. *Int. J. Pediatr*. 2016;58:1277-1283
50. Wantanakorn P, Sawangworachart K, Roongpraiwan R et al. Parents' evaluation of developmental status (PEDS) in screening for developmental delay in Thai children aged 18-30 months. *Indian Pediatr* 2016; 53: 1110–1113.
51. Awasthi S, Pande V. Validation of revised prescreening denver questionnaire in preschool children of urban slums. *Indian Pediatr* 1997; 34: 919-922.
52. Van der Linde J, Swanepoel D, Glascoe F et al. Developmental screening in South Africa: comparing the national developmental checklist to a standardized tool. *Afr Health Sci*. 2015;15:188-196
53. Koura K, Boivin M, Davidson L et al. Usefulness of child development assessments for low-resource settings in francophone Africa. *J Dev Behav Pediatr*. 2013;34:486-493.
54. Nair MK, George B, Philip E et al. Trivandrum Developmental Screening Chart. *Indian Pediatr*. 1991 Aug;28(8):869-72.
55. Gupta R, Patel NV. Trial of a screening technique of the developmental assessment of infants and young children (6 weeks-2 years). *Indian Pediatr*. 1991 Aug 1;28(8):859-67.
56. Singh A, Yeh C, Blanchard S. Ages and stages questionnaire: una escala de evaluación global. *Bol Med Hosp Infant Mex* 2017; 74: 5-12.
57. Squires J, Bricker D. ASQ®-3 - Brookes Publishing Co. [Internet]. Brookes Publishing Co. [cited 10 August 2018]. Available from: <https://brookespublishing.com/product/asq-3/>.
58. Liao W, Wen E, Li C et al. Predicting neurodevelopmental outcomes for at-risk infants: reliability and predictive validity using a Chinese version of the INFANIB at 3, 7 and 10 months. *BMC Pediatr*. 2012;12:27.
59. Glascoe FP. Parents' evaluation of developmental status (PEDS). *Indian Pediatr* 2003; 40: 439–40.
60. Woolfenden S, Eapen V, Williams K et al. A systematic review of the prevalence of parental concerns measured by the Parents' Evaluation of Developmental Status (PEDS) indicating developmental risk. *BMC Pediatr*. 2014;14:231. .
61. Plessis L, Koornhof H, Marais M et al. Implementation of the road-to-health-booklet health promotion messages at primary health care facilities, Western Cape Province, South Africa. *SAJCH* 2017; 11: 164-169
62. Krishnamurthy V, Srinivasan R. Childhood disability screening tools : the south east Asian perspective a review for the who office of the south east Asian region. Mumbai. WHO; 2011.
63. Landers C, Kagitcibasi C. Measuring the psychosocial development of young children: the innocent technical workshop. Consultative Group on Early Childhood Care Development; 1990
64. Mukherjee S, Aneja S, Krishnamurthy V et al. Incorporating developmental screening and surveillance of young children in office practice. *Indian Pediatr*. 2014;51:627-635. .
65. Maulik P, Darmstadt G. Childhood disability in low- and middle-income countries: overview of screening, prevention, services, legislation, and epidemiology. *Pediatrics*. 2007;120:S1-S55. .
66. Fernald L, Prado E, Kariger P et al. A toolkit for measuring early childhood development in low and middle-income countries. *The World Bank*; 2017
67. Sarmiento Campos J, Squires J, Ponte J. Universal developmental screening: preliminary studies in Galicia, Spain. *Early Child Dev Care*. 2010;181:475-485. .
68. Pomés M, Squires J, Yovanoff P. Psychometric examination of a Spanish translation of a developmental screening instrument. *J Early Child Res*. 2014;14:132-145. .
69. Kiing J, Rajgor D, Toh T. Topical review: mind your language—translation matters (a narrative review of translation challenges). *J. Pediatr. Psychol*. 2016;41:1110-1119. .

- 1  
2  
3 70. Parveen M, Rahman S, Islam S et al. Adaptation of items of bayley scales of infant development-II (BSID-II) suitable for Bangladeshi infants. *Dhaka University J. Biol. Sci.* 2014;23:187-195.
- 4  
5 71. Revel M. Article 12: Respect for cultural diversity and pluralism. In: ten Have H, Stanton-Jean M, ed. by. The UNESCO universal declaration on bioethics and human rights. *UNESCO Publishing*; 2019. p. 199-209. .
- 6  
7  
8 72. Levine R, Levine S, Dixon S et al. Child care and culture. Cambridge: Cambridge University Press; 1994. .
- 9  
10 73. Brooks E, Novins D, Noe T et al. Reaching rural communities with culturally appropriate care: a model for adapting remote monitoring to American Indian veterans with posttraumatic stress disorder. *Telemed e-Health.* 2013;19:272-277.
- 11  
12 74. Zarem C, Crapnell T, Tiltges L et al. Neonatal Nurses' and Therapists' Perceptions of Positioning for Preterm Infants in the Neonatal Intensive Care Unit. *Neonatal Netw* 2013;32:110-116.
- 13  
14 75. Tsai S, Chen C, Lin M. Prediction for developmental delay on Neonatal Oral Motor Assessment Scale in preterm infants without brain lesion. *Int. J. Pediatr.* 2010;52:65-68.
- 15  
16 76. Garg P, Ha MT, Eastwood J et al. Health professional perceptions regarding screening tools for developmental surveillance for children in a multicultural part of Sydney, Australia. *BMC Fam Pract.* 2018 Dec 1;19(1):42.
- 17  
18 77. Lowry F. Brain chemistry differs in autism vs developmental delay [Internet]. *Medscape.* 2013 [cited 5 July 2018]. Available from: <https://www.medscape.com/viewarticle/808794>.
- 19  
20 78. Ngoma MS M. The effect of HIV on developmental milestones in children. *J AIDS Clin Res.* 2015;06:482. .
- 21  
22  
23  
24  
25  
26  
27  
28  
29  
30  
31  
32  
33  
34  
35  
36  
37  
38  
39  
40  
41  
42  
43  
44  
45  
46  
47  
48  
49  
50  
51  
52  
53  
54  
55  
56  
57  
58  
59  
60



**Table 1:** Brief description of the selected screening tools

| Screening Tool                                                  | Country of Origin | Study Country | Concerned Age      | Parent-Reported Version | Questionnaire Type | Number of Questionnaires | Number of items     | Developmental Domain                                                                                                                                | Validated Against                                                                                                                  |
|-----------------------------------------------------------------|-------------------|---------------|--------------------|-------------------------|--------------------|--------------------------|---------------------|-----------------------------------------------------------------------------------------------------------------------------------------------------|------------------------------------------------------------------------------------------------------------------------------------|
| <i>General Screening Tools</i>                                  |                   |               |                    |                         |                    |                          |                     |                                                                                                                                                     |                                                                                                                                    |
| <b>Ages and Stages Questionnaire (ASQ)</b>                      | USA               | India, China  | 1–66 months        | Yes                     | Q & A              | 21 age sets              | 30 items per set    | Communication, gross motor, fine motor, problem solving, personal-social                                                                            | Developmental Assessment Scales for Indian Infants (DASII) [38]<br>Bayley Scales of Infant Development (BSID-III) [39]             |
| <b>Development Screening Questionnaire (DSQ)</b>                | Bangladesh        | Bangladesh    | birth to 24 months | No                      | Q & A              | 24 age sets              | 8 questions per set | Gross motor, fine motor, vision; hearing, cognition, socialization, behaviour, and speech                                                           | Rapid Neurodevelopmental Assessment (RNDA) [41]                                                                                    |
| <b>Guide for Monitoring Child Development (GMCD)</b>            | Turkey            | Turkey        | 0-3.5 years        | Yes                     | Q & A              | Single                   | 7 items             | Expressive language and communication, Receptive language, Fine and gross motor, Social-emotional, Self-help                                        | Bayley Scales of Infant Development (Bayley-II) [42]                                                                               |
| <b>Lucknow Developmental Screen (LDS)</b>                       | India             | India         | birth to 24 months | Yes                     | Chart              | Single                   | 27 item             | Motor, mental, language, social                                                                                                                     | Developmental Assessment Scales for Indian Infants (DASII) [46]<br>Vineland Social Maturity Scale [46]                             |
| <b>Mongolian Rapid Baby Scale (MORBAS)</b>                      | Mongolia          | Mongolia      | 0 to 42 months     | No                      | Written            | Single                   | 161 item            | Cognitive, receptive communication, expressive communication, fine motor, gross motor, social-emotional, adaptive behavior                          | Bayley Scales of Infant and Toddler Development (BSID-III) [47]                                                                    |
| <b>New Delhi – Development Screening Questionnaire (ND-DSQ)</b> | India             | India         | 9 to 18 months     | Yes                     | Q & A              | 2 age sets               | 20 items            | General screening tool (domains not explicitly mentioned)                                                                                           | Developmental Assessment Scales for Indian Infants (DASII) [48]                                                                    |
| <b>Parent Evaluation of Developmental Status (PEDS)</b>         | USA               | Thailand      | birth to 8 years   | Yes                     | Q & A              | Single                   | 10 items            | Global /cognitive, speech / expressive language, receptive language, behaviour, social-emotional, school, self-help, fine motor, gross motor, other | Parent Evaluation of Developmental Status: Developmental Milestones, Assessment Level [49]<br>Mullen Scales of Early Learning [50] |

|                                                                               |              |              |                     |     |           |            |            |                                                                             |                                                                                                                                   |
|-------------------------------------------------------------------------------|--------------|--------------|---------------------|-----|-----------|------------|------------|-----------------------------------------------------------------------------|-----------------------------------------------------------------------------------------------------------------------------------|
| <b>Rapid Prescreening Denver Questionnaire (R-PDQ)</b>                        | USA          | India        | 0-6 years           | No  | Q & A     | 4 age sets | 25 items   | Gross motor, fine motor activity, personal-social, language                 | Denver Developmental Screening Test (DDST) [51]                                                                                   |
| <b>Road to Health Booklet Developmental Checklist (RTHB-DC)</b>               | South Africa | South Africa | 14 weeks to 6 years | No  | Checklist | Single     | 21 items   | Gross motor, fine motor, communication, vision, hearing                     | Parent Evaluation of Developmental Status (PEDS) [52]<br>Parent Evaluation of Developmental Status: Developmental Milestones [52] |
| <b>Ten Questions Screening Instrument (TQSI)</b>                              | Multiple     | Benin        | 2 to 9 years        | Yes | Q & A     | Single     | 10 items   | Vision, hearing, seizure, cognition, motor                                  | Mullen Scales of Early Learning [53]                                                                                              |
| <b>Trivandrum Developmental Screening Chart (TDSC)</b>                        | India        | India        | 0 to 2 years        | No  | Chart     | Single     | 17 items   | Mental, motor, vision, hearing                                              | Denver Developmental Screening Test (DDST) [54]                                                                                   |
| <b>Woodside System Screening Technique (WSST)</b>                             | Scotland     | India        | 0 to 4 years        | No  | Chart     | Single     | 70 items   | 'Social', 'Hearing and language', 'Vision and fine motor', and 'Gross motor | Gesell's Developmental Schedules (GDS) [55]                                                                                       |
| <i>Language Screening Tools</i>                                               |              |              |                     |     |           |            |            |                                                                             |                                                                                                                                   |
| <b>American Speech-Language and Hearing Association (ASHA)</b>                | USA          | Brazil       | 0-5 years           | No  | Q & A     | 7 age sets | 6-13 items | Language reception and expression                                           | ABFW test [40]                                                                                                                    |
| <b>Language Evaluation Scale Trivandrum for 0-3 years (LEST 0-3)</b>          | India        | India        | 0 to 3 years        | No  | Chart     | Single     | 33 items   | Speech and language                                                         | Receptive Expressive Emergent Language Scale [44]                                                                                 |
| <i>Motor Screening Tools</i>                                                  |              |              |                     |     |           |            |            |                                                                             |                                                                                                                                   |
| <b>Infant Neurological International Battery (INFANIB)</b>                    | USA          | Iran         | 0 to 18 months      | No  | Not found | Single     | 20-items   | Gross motor                                                                 | Developmental Assessment by Pediatric Neurologist [43]                                                                            |
| <b>Little Developmental Coordination Disorder Questionnaire (Little DCDQ)</b> | Canada       | South Africa | 3-5 years           | Yes | Q & A     | Single     | 15 items   | Gross motor, fine motor                                                     | Movement Assessment Battery for Children -2 [45]                                                                                  |

**Table 2: Major findings from the selected studies used in this review**

| Parents/ Caregiver Reported Tools |                                  |                                                          |                                                                                              |                                              |                                                                     |                          |                                          |
|-----------------------------------|----------------------------------|----------------------------------------------------------|----------------------------------------------------------------------------------------------|----------------------------------------------|---------------------------------------------------------------------|--------------------------|------------------------------------------|
| General Screening Tools           |                                  |                                                          |                                                                                              |                                              |                                                                     |                          |                                          |
| Ref.                              | Country                          | Screening Tool                                           | Gold Standard                                                                                | Study                                        | Participants                                                        | Key Findings             |                                          |
| [38]                              | India<br>Lower-Middle- Income    | Ages and Stages Questionnaire (ASQ-II)                   | Developmental Assessment Scales for Indian Infants (DASII)                                   | Design Cross-Sectional<br>Setting Hospital   | Sample - 200<br>Age – 4, 10, 18 and 24 months<br>Convenience sample | Overall                  | Sensitivity 83.3%<br>Specificity 75.4%   |
| [39]                              | China<br>Upper-Middle- Income    | Ages and Stages Questionnaire (ASQ-III)                  | Bayley Scales of Infant Development (BSID-III)                                               | Design Cross-Sectional<br>Setting Community  | Sample – 1831<br>Age – 5-24 months<br>Cluster random sample         | Overall                  | Sensitivity 76.52%<br>Specificity 40.97% |
| [42]                              | Turkey<br>Upper-Middle- Income   | Guide for Monitoring Child Development (GMCD)            | Bayley Scales of Infant Development (Bayley-II)                                              | Design Cross-Sectional<br>Setting - Hospital | Sample – 79<br>Age – 1-24 months<br>Random sample                   | Overall                  | Sensitivity 88%<br>Specificity 93%       |
| [46]                              | India<br>Lower-Middle- Income    | Lucknow Development Screen (LDS)                         | Developmental Assessment Scales for Indian Infants (DASII)<br>Vineland Social Maturity Scale | Design Cross-Sectional<br>Setting Hospital   | Sample - 142<br>Age - 6-24 months<br>Convenience sample             | Overall                  | Sensitivity 95.9%<br>Specificity 73.1%   |
| [48]                              | India<br>Lower-Middle- Income    | New Delhi – Development Screening Questionnaire (ND-DSQ) | Developmental Assessment Scales for Indian Infants (DASII)                                   | Design Cross-Sectional<br>Setting Hospital   | Sample - 200<br>Age – 9 and 18 months<br>Convenience sample         | 9-months                 | Sensitivity 100%<br>Specificity 87.2%    |
|                                   |                                  |                                                          |                                                                                              |                                              |                                                                     | 18-months                | Sensitivity 91.4%<br>Specificity 88.7%   |
| [49]                              | Thailand<br>Upper-Middle- Income | Parent Evaluation of Developmental Status (PEDS)         | Parent Evaluation of Developmental Status: Developmental Milestones, Assessment Level        | Design Cross-Sectional<br>Setting Hospital   | Sample - 266<br>Age – 9, 18 and 30 months<br>Convenience sample     | ≥ 1 significant concern  | Sensitivity 67.7%<br>Specificity 60.7%   |
|                                   |                                  |                                                          |                                                                                              |                                              |                                                                     | ≥ 2 significant concerns | Sensitivity 27.7%<br>Specificity 93.0%   |
| [50]                              | Thailand<br>Upper-Middle- Income | Parent Evaluation of Developmental Status (PEDS- Thai)   | Mullen Scales of Early Learning                                                              | Design Cross-Sectional<br>Setting Hospital   | Sample - 137<br>Age – 18-30 months<br>Convenience sample            | Overall                  | Sensitivity 92.8%<br>Specificity 49.2%   |
| [53]                              | Benin<br>Lower-Middle- Income    | Ten Questions Screening Instrument (TQSI)                | Mullen Scales of Early Learning                                                              | Design Cross-Sectional                       | Sample - 357<br>Age – 12 months<br>Random sample                    | Motor                    | Sensitivity 76.5%<br>Specificity 75.7%   |
|                                   |                                  |                                                          |                                                                                              | Setting Screening- Household                 |                                                                     | Overall                  | Sensitivity 81%<br>Specificity 31%       |



| Ref.                                           | Country                              | Screening Tool                                                         | Gold Standard                                                                                                               | Study                                                                                                   | Participants                                                                                                 | Key Findings                                              |                                                                                    |
|------------------------------------------------|--------------------------------------|------------------------------------------------------------------------|-----------------------------------------------------------------------------------------------------------------------------|---------------------------------------------------------------------------------------------------------|--------------------------------------------------------------------------------------------------------------|-----------------------------------------------------------|------------------------------------------------------------------------------------|
| <i>Motor Screening Tools</i>                   |                                      |                                                                        |                                                                                                                             |                                                                                                         |                                                                                                              |                                                           |                                                                                    |
| [45]                                           | South Africa<br>Upper-Middle- Income | Little Developmental Coordination Disorder Questionnaire (Little DCDQ) | Movement Assessment Battery for Children -2                                                                                 | <b>Design</b> – Cross-sectional<br><br><b>Setting</b> – nursery schools                                 | <b>Sample</b> – 53<br><br><b>Age</b> – 3-5 years<br><br><b>Convenience sample</b>                            | Overall                                                   | Sensitivity 57.14%<br>Specificity 81.25%                                           |
| <b>Direct Child Testing/ Observation Tools</b> |                                      |                                                                        |                                                                                                                             |                                                                                                         |                                                                                                              |                                                           |                                                                                    |
| <i>General Screening Tools</i>                 |                                      |                                                                        |                                                                                                                             |                                                                                                         |                                                                                                              |                                                           |                                                                                    |
| Ref.                                           | Country                              | Screening Tool                                                         | Gold Standard                                                                                                               | Study                                                                                                   | Participants                                                                                                 | Key Findings                                              |                                                                                    |
| [41]                                           | Bangladesh<br>Lower-Middle- Income   | Development Screening Questionnaire (DSQ)                              | Rapid Neurodevelopmental Assessment (RNDA)                                                                                  | <b>Design</b> Cross-Sectional<br><br><b>Setting</b><br>Screening- Household<br><br>Assessment- Hospital | <b>Sample</b> – 197<br><br><b>Age</b> - 0-2 years<br><br><b>Random sample</b>                                | Overall                                                   | Sensitivity 47.1%<br>Specificity 97.2%                                             |
| [47]                                           | Mongolia<br>Lower-Middle- Income     | Mongolian Rapid Baby Scale (MORBAS)                                    | Bayley Scales of Infant and Toddler Development-III                                                                         | <b>Design</b> Cross-Sectional<br><br><b>Setting</b> Hospital                                            | <b>Sample</b> - 150<br><br><b>Age</b> – 0 month 16 days – 42 months 15 days<br><br><b>Convenience sample</b> | Overall                                                   | Sensitivity 81.8%<br>Specificity 52.3%                                             |
| [51]                                           | India<br>Lower-Middle- Income        | Revised Prescreening Denver Questionnaire (R-PDQ)                      | Denver Developmental Screening Test (DDST)                                                                                  | <b>Design</b> Cross-Sectional<br><br><b>Setting</b> Community                                           | <b>Sample</b> - 126<br><br><b>Age</b> – 2-4 years<br><br><b>Cluster random sample</b>                        | Delay in $\geq 1$ domain<br><br>Delay in $\geq 2$ domains | Sensitivity 100%<br>Specificity 7.8%<br><br>Sensitivity 18.2%<br>Specificity 42.6% |
| [52]                                           | South Africa<br>Upper-Middle- Income | Road to Health Booklet Developmental Checklist (RTHB-DC)               | Parent Evaluation of Developmental Status (PEDS)<br><br>Parent Evaluation of Developmental Status: Developmental Milestones | <b>Design</b> Comparative Cross-sectional within-subject<br><br><b>Setting</b> PHC clinics              | <b>Sample</b> - 201<br><br><b>Age</b> – 6-12 months<br><br><b>Convenience sample</b>                         | Overall                                                   | Sensitivity 25%<br>Specificity 91%                                                 |
| [54]                                           | India<br>Lower-Middle- Income        | Trivandrum Developmental Screening Chart (TDSC)                        | Denver Developmental Screening Test (DDST)                                                                                  | <b>Design</b> Cross-Sectional<br><br><b>Setting</b> – Hospital + Community                              | <b>Sample</b> – 1945<br><br><b>Age</b> – 0-2 years<br><br><b>Cluster random sample</b>                       | Overall                                                   | Sensitivity 66.7%<br>Specificity 78.8%                                             |
| [55]                                           | India<br>Lower-Middle- Income        | Woodside Screening Technique (WSST)                                    | Gesell's Developmental Schedules (GDS)                                                                                      | <b>Design</b> Cross-Sectional<br><br><b>Setting</b> – Community                                         | <b>Sample</b> – 619<br><br><b>Age</b> – 6 weeks-2 years<br><br><b>Random sample</b>                          | Overall                                                   | Sensitivity 83%<br>Specificity 88%                                                 |
| <i>Language Screening Tools</i>                |                                      |                                                                        |                                                                                                                             |                                                                                                         |                                                                                                              |                                                           |                                                                                    |

| Ref.                         | Country                        | Screening Tool                                                | Gold Standard                                     | Study                                         | Participants                                             | Key Findings   |                                         |
|------------------------------|--------------------------------|---------------------------------------------------------------|---------------------------------------------------|-----------------------------------------------|----------------------------------------------------------|----------------|-----------------------------------------|
| [40]                         | Brazil<br>Upper-Middle- Income | American Speech-Language and Hearing Association (ASHA)       | ABFW test                                         | Design Cross-Sectional<br>Setting - Community | Sample – 1000<br>Age – 0-5 years<br>Random sample        | Overall        | Sensitivity 82.5%<br>Specificity 98.93% |
| [44]                         | India<br>Lower-Middle- Income  | Language Evaluation Scale Trivandrum for 0-3 years (LEST 0-3) | Receptive Expressive Emergent Language Scale      | Design Cross-Sectional<br>Setting - Community | Sample – 643<br>Age – 0-3 years<br>Cluster random sample | One item delay | Sensitivity 95.8%<br>Specificity 77.5%  |
|                              |                                |                                                               |                                                   |                                               |                                                          | Two item delay | Sensitivity 66.7%<br>Specificity 94.8%  |
| <i>Motor Screening Tools</i> |                                |                                                               |                                                   |                                               |                                                          |                |                                         |
| Ref.                         | Country                        | Screening Tool                                                | Gold Standard                                     | Study                                         | Participants                                             | Key Findings   |                                         |
| [43]                         | Iran<br>Upper-Middle- Income   | Infant Neurological International Battery (INFANIB)           | Developmental Assessment by Pediatric Neurologist | Design – Cross-Sectional<br>Setting Hospital  | Sample – 153<br>Age – 4-18 months<br>Random sample       | Overall        | Sensitivity 90%<br>Specificity 83%      |

For peer review only

1  
2  
3  
4  
5  
6  
7  
8  
9  
10  
11  
12  
13  
14  
15  
16  
17  
18  
19  
20  
21  
22  
23  
24  
25  
26  
27  
28  
29  
30  
31  
32  
33  
34  
35  
36  
37  
38  
39  
40  
41  
42  
43  
44  
45  
46  
47

1  
2  
3  
4  
5  
6  
7  
8  
9  
10  
11  
12  
13  
14  
15  
16  
17  
18  
19  
20  
21  
22  
23  
24  
25  
26  
27  
28  
29  
30  
31  
32  
33  
34  
35  
36  
37  
38  
39  
40  
41  
42  
43  
44  
45  
46  
47  
48  
49  
50  
51  
52  
53  
54  
55  
56  
57  
58  
59  
60

For peer review only

**Figure 1:** PRISMA flow diagram

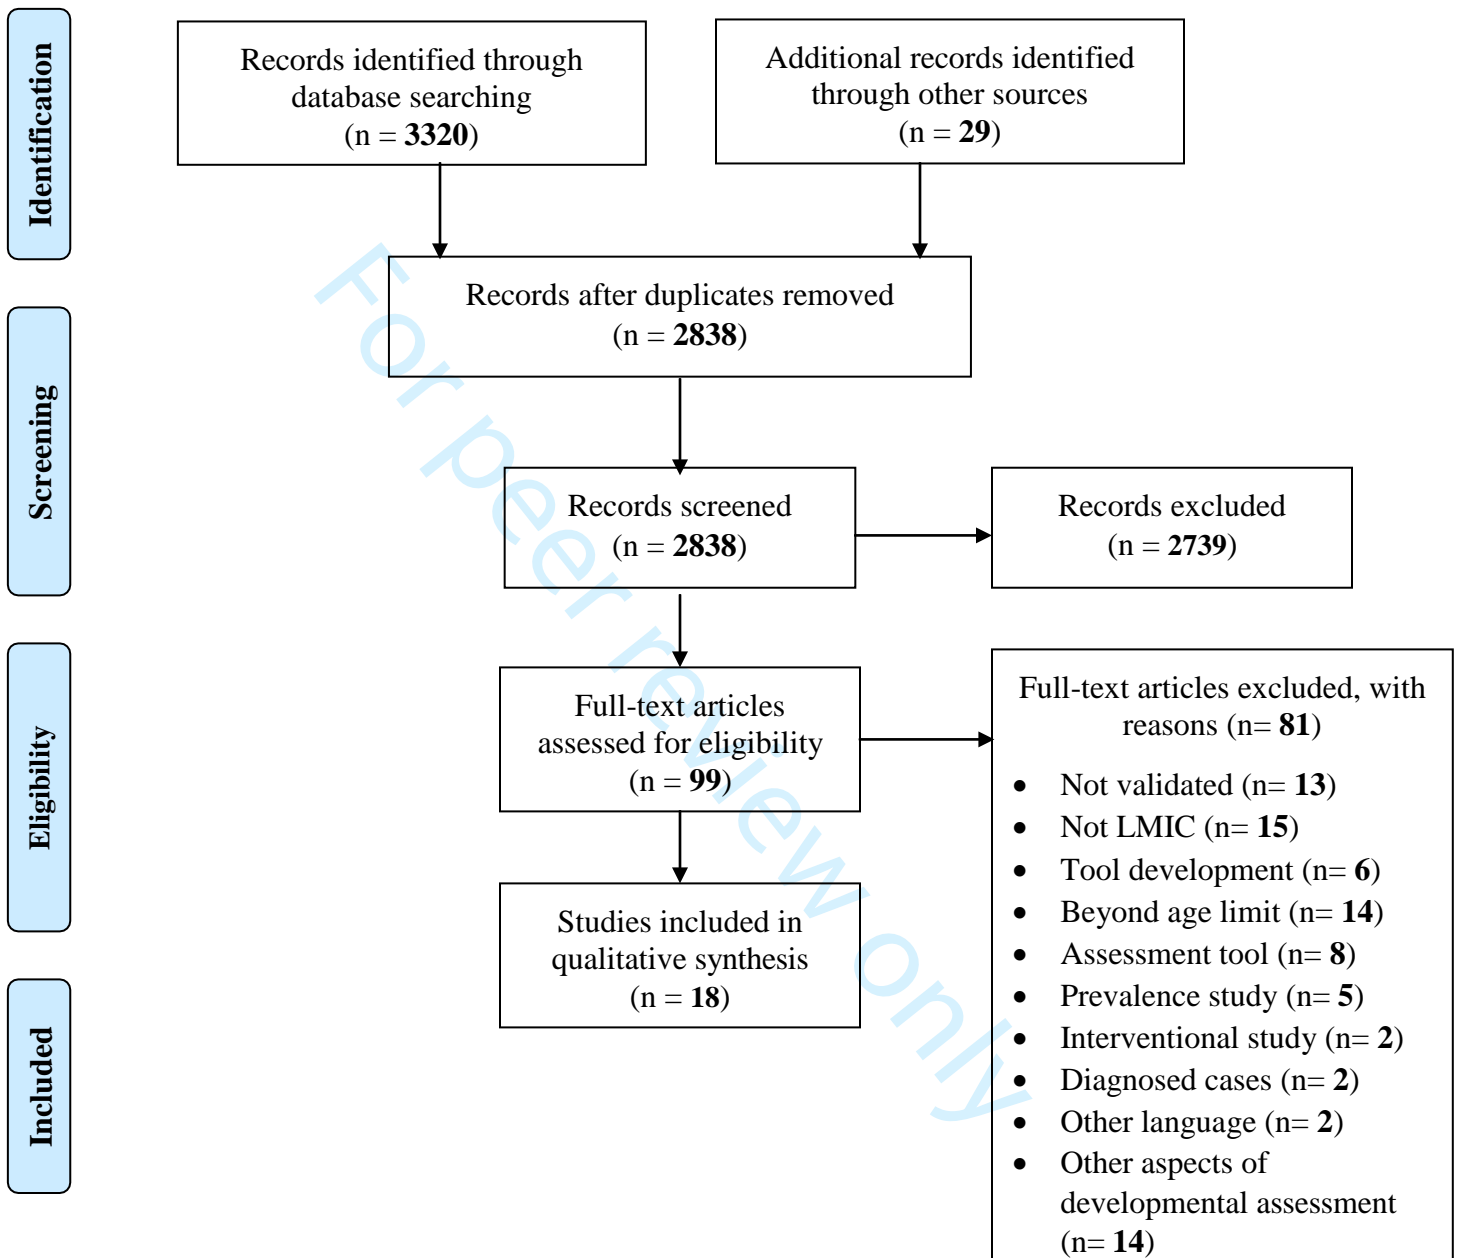

**Supplementary Figure S1: Correlation between NMR and Prevalence of DD (Taiwan 1997-2008)**

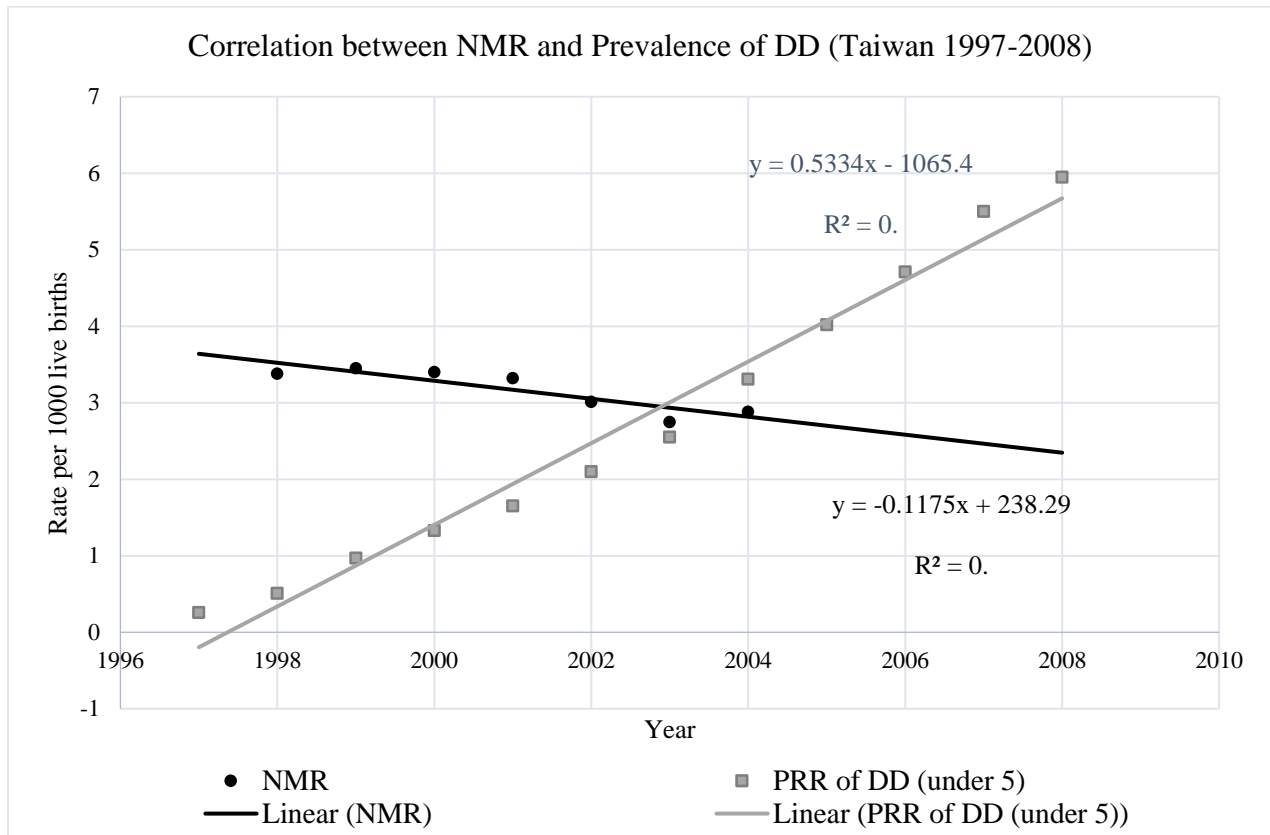

**Figure S1:** Correlation between neonatal mortality rate and prevalence of developmental delay (Taiwan 1997-2008)

Footnote: We have used prevalence of developmental delay among under 5 children (1997-2008) from a nation-wide population based retrospective study [18] and neonatal mortality rate (1998-2004) from another study [19]. It was revealed that the prevalence of developmental delay is positively associated with time and negatively associated with NMR. So, it can be said that, with time, while neonatal mortality rate is reducing, the prevalence of developmental delay is gradually increasing.

## Supplementary Table S1: Medline search strategy

**MEDLINE: Systematic review - screening for disorders in children in LMIC (as at 05.03.18)**

**Notes: No date or language limits applied.**

Database: Ovid MEDLINE <1946 to 2018 February 28> (Phase 1)

Search Strategy:

```

1  exp Mass Screening/ (114856)
2  screen$.tw. (543259)
3  exp DIAGNOSIS/ (7780076)
4  (early adj5 (diagnos$ or identif$ or detect$ or discover$)).tw. (179324)
5  1 or 2 or 3 or 4 (8132793)
6  exp "Surveys and Questionnaires"/ (881308)
7  (survey$ or questionnaire$).tw. (745680)
8  (instrument$ or tool$).tw. (665937)
9  6 or 7 or 8 (1849661)
10 5 and 9 (774120)
11 exp Neurodevelopmental Disorders/ (162135)
12 exp Motor Disorders/ (197)
13 exp Cerebral Palsy/ (18455)
14 (cerebral adj pals$).tw. (17316)
15 CP.tw. (36947)
16 exp Cognitive Dysfunction/ (7530)
17 exp Communication Disorders/ (59072)
18 ((development$ or motor$ or speech$ or cogniti$ or behav$) adj5 (disorder$ or disabilit$ or condition$ or
impair$ or deficit$)).tw. (200268)
19 11 or 12 or 13 or 14 or 15 or 16 or 17 or 18 (415783)
20 10 and 19 (27683)
21 exp Developing Countries/ (69408)
22 exp ASIA/ (698877)
23 exp AFRICA/ (230576)
24 exp South America/ (134532)
25 asia$.tw. (100200)
26 africa$.tw. (169185)
27 (south adj1 america$).tw. (14876)
28 (low adj2 income adj2 countr$).tw. (4196)
29 (middle adj2 income adj2 countr$).tw. (7713)
30 LMIC.tw. (649)
31 21 or 22 or 23 or 24 or 25 or 26 or 27 or 28 or 29 or 30 (1214625)
32 20 and 31 (2207)
33 limit 32 to humans (2185)
34 remove duplicates from 33 (2183)
35 limit 34 to "all child (0 to 18 years)" (1270)
36 exp INFANT/ (1056001)
37 exp CHILD/ (1753019)
38 exp ADOLESCENT/ (1842871)
39 (paediatric$ or pediatric$ or child$ or adolescen$ or teen$ or infant$ or baby or babies).tw. (1586099)
40 36 or 37 or 38 or 39 (3520016)
41 34 and 40 (1313)
42 35 or 41 (1313)
*****

```

1  
2  
3 Database: Ovid MEDLINE(R) ALL <1946 to July 13, 2020> (Phase 2)  
4

5 Search Strategy:  
6 -----

7 1 exp Mass Screening/ (127799)  
8 2 screen\$.tw. (748410)  
9 3 exp DIAGNOSIS/ (8521264)  
10 4 (early adj5 (diagnos\$ or identif\$ or detect\$ or discover\$)).tw. (247525)  
11 5 1 or 2 or 3 or 4 (9082816)  
12 6 exp "Surveys and Questionnaires"/ (1030942)  
13 7 (survey\$ or questionnaire\$).tw. (1039336)  
14 8 (instrument\$ or tool\$).tw. (981681)  
15 9 6 or 7 or 8 (2492583)  
16 10 5 and 9 (930528)  
17 11 exp Neurodevelopmental Disorders/ (180714)  
18 12 exp Motor Disorders/ (480)  
19 13 exp Cerebral Palsy/ (20558)  
20 14 (cerebral adj pals\$).tw. (22436)  
21 15 CP.tw. (54326)  
22 16 exp Cognitive Dysfunction/ (17245)  
23 17 exp Communication Disorders/ (63349)  
24 18 ((development\$ or motor\$ or speech\$ or cogniti\$ or behav\$) adj5 (disorder\$ or disabilit\$ or condition\$ or  
25 impair\$ or deficit\$)).tw. (283402)  
26 19 11 or 12 or 13 or 14 or 15 or 16 or 17 or 18 (537248)  
27 20 10 and 19 (34449)  
28 21 exp Developing Countries/ (74723)  
29 22 exp ASIA/ (832820)  
30 23 exp AFRICA/ (265707)  
31 24 exp South America/ (161136)  
32 25 asia\$.tw. (146545)  
33 26 africa\$.tw. (228897)  
34 27 (south adj1 america\$).tw. (21374)  
35 28 (low adj2 income adj2 countr\$).tw. (7421)  
36 29 (middle adj2 income adj2 countr\$).tw. (18310)  
37 30 LMIC.tw. (1795)  
38 31 21 or 22 or 23 or 24 or 25 or 26 or 27 or 28 or 29 or 30 (1497552)  
39 32 20 and 31 (2846)  
40 33 limit 32 to humans (2778)  
41 34 limit 33 to "all child (0 to 18 years)" (1553)  
42 35 exp INFANT/ (1136560)  
43 36 exp CHILD/ (1905000)  
44 37 exp ADOLESCENT/ (2022225)  
45 38 (paediatric\$ or pediatric\$ or child\$ or adolescen\$ or teen\$ or infant\$ or baby or babies).tw. (1999177)  
46 39 35 or 36 or 37 or 38 (4073700)  
47 40 33 and 39 (1614)  
48 41 34 or 40 (1614)  
49 42 limit 41 to yr="2018 -Current" (242)  
50 \*\*\*\*\*  
51  
52  
53  
54  
55  
56  
57  
58  
59  
60

**Supplementary Table S2:** List of key definitions regarding study selection

| <b>Key words</b>                | <b>Definitions</b>                                                                                                                                                                                                           |
|---------------------------------|------------------------------------------------------------------------------------------------------------------------------------------------------------------------------------------------------------------------------|
| <b>Assessment</b>               | Assessment is a process for defining the nature of that problem, determining a diagnosis, and developing specific treatment recommendations for addressing the problem or diagnosis.                                         |
| <b>Developmental Assessment</b> | In-depth examination of child's development conducted by developmental pediatrician/ child psychologist                                                                                                                      |
| <b>Developmental Delay</b>      | A condition where a child does not reach it's developmental milestones at the expected times                                                                                                                                 |
| <b>Developmental Disability</b> | The severe and chronic form of developmental delay which is expected to continue indefinitely and substantially restricts the individual's daily living activities                                                           |
| <b>Developmental Domain</b>     | A collective term used to describe different aspects of brain growth and development                                                                                                                                         |
| <b>Developmental Monitoring</b> | Observing child's developmental progress by parents/ caregivers                                                                                                                                                              |
| <b>Developmental Screening</b>  | Looking for specific developmental concern by doctors/ healthcare professionals using brief questionnaire/ checklist                                                                                                         |
| <b>Disability</b>               | any restriction or lack (resulting from an impairment) of ability to perform an activity in the manner or within the range considered normal for a human being.                                                              |
| <b>Gray Literature</b>          | Research that is either unpublished or has been published in non-commercial form. Example: government reports, conference proceedings, pre-prints and post-prints of articles, theses and dissertations, etc.                |
| <b>Hand Searching</b>           | The page-by-page examination of journal issues, conference proceedings, reference lists of journal articles and other publications for relevant studies                                                                      |
| <b>Impairment</b>               | any loss or abnormality of psychological, physiological or anatomical structure or function.                                                                                                                                 |
| <b>Item</b>                     | List of activities under a screening tool or questionnaire                                                                                                                                                                   |
| <b>Monitoring</b>               | monitoring involves routine evaluation of changes to health or health risks                                                                                                                                                  |
| <b>Original Article</b>         | It is the report of a study written by the researchers who conducted the study                                                                                                                                               |
| <b>Psychometric Properties</b>  | Psychometric properties refer to the reliability and validity of a test                                                                                                                                                      |
| <b>Reliability</b>              | Reliability refers to the extent to which an assessment/ screening tool produces stable and consistent results                                                                                                               |
| <b>Review Article</b>           | Critical and constructive analysis of existing published literature in a field, considered as secondary literature.                                                                                                          |
| <b>Screening</b>                | Screening is a process for evaluating the possible presence of a particular problem. The outcome is normally a simple yes or no                                                                                              |
| <b>Sensitivity</b>              | The ability of a test to correctly identify those who have the disease                                                                                                                                                       |
| <b>specificity</b>              | The ability of a test to correctly identify those who do not have the disease                                                                                                                                                |
| <b>Surveillance</b>             | Ongoing systematic collection of health data essential to the planning, implementation and evaluation of the public health practice closely integrated with the timely dissemination of these data to those who need to know |
| <b>Validity</b>                 | The ability of a test to distinguish between who has a disease and who does not                                                                                                                                              |



**Supplementary Table S3: Quality Assessment Tool for Diagnostic Accuracy Studies-2 rating of the selected studies (Part 1)**

|                                                                                                                     | [38] | [39]    | [40]    | [41]    | [42]    | [43]    | [44]    | [45]    | [46]    |
|---------------------------------------------------------------------------------------------------------------------|------|---------|---------|---------|---------|---------|---------|---------|---------|
| <b>DOMAIN 1: PATIENT SELECTION</b>                                                                                  |      |         |         |         |         |         |         |         |         |
| <i>A. Risk of Bias</i>                                                                                              |      |         |         |         |         |         |         |         |         |
| Was a consecutive or random sample of patients enrolled?                                                            | No   | Yes     | Yes     | Yes     | Yes     | Yes     | Yes     | No      | No      |
| Was a case-control design avoided?                                                                                  | Yes  | Yes     | Yes     | Yes     | Yes     | Yes     | Yes     | Yes     | Yes     |
| Did the study avoid inappropriate exclusions?                                                                       | Yes  | Unclear | Unclear | Unclear | Unclear | Unclear | Yes     | Yes     | Yes     |
| Could the selection of patients have introduced bias?                                                               | High | Unclear | Unclear | Unclear | Unclear | Unclear | Low     | High    | High    |
| <i>B. Concerns regarding applicability</i>                                                                          |      |         |         |         |         |         |         |         |         |
| Is there concern that the included patients do not match the review question?                                       | Low  | Low     | Low     | Low     | Low     | Low     | Low     | Low     | Low     |
| <b>DOMAIN 2: INDEX TEST(S)</b>                                                                                      |      |         |         |         |         |         |         |         |         |
| <i>A. Risk of Bias</i>                                                                                              |      |         |         |         |         |         |         |         |         |
| Were the index test results interpreted without knowledge of the results of the reference standard?                 | Yes  | Yes     | Yes     | Yes     | Yes     | Yes     | Yes     | Yes     | Yes     |
| If a threshold was used, was it pre-specified?                                                                      | Yes  | Yes     | Yes     | Yes     | Yes     | Yes     | Yes     | Yes     | Yes     |
| Could the conduct or interpretation of the index test have introduced bias?                                         | Low  | Low     | Low     | Low     | Low     | Low     | Low     | Low     | Low     |
| <i>B. Concerns regarding applicability</i>                                                                          |      |         |         |         |         |         |         |         |         |
| Is there concern that the index test, its conduct, or interpretation differ from the review question?               | Low  | Low     | Low     | Low     | Low     | Low     | Low     | Low     | Low     |
| <b>DOMAIN 3: REFERENCE STANDARD</b>                                                                                 |      |         |         |         |         |         |         |         |         |
| <i>A. Risk of Bias</i>                                                                                              |      |         |         |         |         |         |         |         |         |
| Is the reference standard likely to correctly classify the target condition?                                        | Yes  | Yes     | Yes     | Yes     | Yes     | Yes     | Yes     | Yes     | Yes     |
| Were the reference standard results interpreted without knowledge of the results of the index test?                 | Yes  | Yes     | Yes     | Yes     | Yes     | Unclear | Yes     | Yes     | Yes     |
| Could the reference standard, its conduct, or its interpretation have introduced bias?                              | Low  | Low     | Low     | Low     | Low     | Unclear | Low     | Low     | Low     |
| <i>B. Concerns regarding applicability</i>                                                                          |      |         |         |         |         |         |         |         |         |
| Is there concern that the target condition as defined by the reference standard does not match the review question? | Low  | Low     | Low     | Low     | Low     | Low     | Low     | Low     | Low     |
| <b>DOMAIN 4: FLOW AND TIMING</b>                                                                                    |      |         |         |         |         |         |         |         |         |
| <i>A. Risk of Bias</i>                                                                                              |      |         |         |         |         |         |         |         |         |
| Was there an appropriate interval between index test(s) and reference standard?                                     | No   | Yes     | Yes     | Yes     | Yes     | Yes     | Unclear | Unclear | Unclear |
| Did all patients receive a reference standard?                                                                      | Yes  | Yes     | Yes     | No      | Yes     | No      | No      | No      | Yes     |
| Did patients receive the same reference standard?                                                                   | Yes  | Yea     | Yea     | Yes     | Yea     | Yes     | Yes     | Yes     | No      |
| Were all patients included in the analysis?                                                                         | Yes  | Yes     | Yes     | Yes     | Yes     | No      | No      | No      | Yes     |
| Could the patient flow have introduced bias?                                                                        | Low  | Low     | Low     | Low     | Low     | High    | Unclear | Unclear | Low     |

Supplementary Table S3: Quality Assessment Tool for Diagnostic Accuracy Studies-2 rating of the selected studies (Part 2)

|                                                                                                                     |         |      |         |         |         |         |         |         |      |
|---------------------------------------------------------------------------------------------------------------------|---------|------|---------|---------|---------|---------|---------|---------|------|
|                                                                                                                     | [47]    | [48] | [49]    | [50]    | [51]    | [52]    | [53]    | [54]    | [55] |
| <b>DOMAIN 1: PATIENT SELECTION</b>                                                                                  |         |      |         |         |         |         |         |         |      |
| <i>A. Risk of Bias</i>                                                                                              |         |      |         |         |         |         |         |         |      |
| Was a consecutive or random sample of patients enrolled?                                                            | No      | No   | No      | No      | Yes     | No      | Yes     | Yes     | Yes  |
| Was a case-control design avoided?                                                                                  | Yes     | Yes  | Yes     | Yes     | Yes     | Yes     | Yes     | Yes     | Yes  |
| Did the study avoid inappropriate exclusions?                                                                       | Yes     | Yes  | Yes     | Yes     | Yes     | Unclear | Unclear | Yes     | Yes  |
| Could the selection of patients have introduced bias?                                                               | High    | High | High    | High    | Low     | Unclear | Unclear | Low     | Low  |
| <i>B. Concerns regarding applicability</i>                                                                          |         |      |         |         |         |         |         |         |      |
| Is there concern that the included patients do not match the review question?                                       | Low     | Low  | Low     | Low     | Low     | Low     | Low     | Low     | Low  |
| <b>DOMAIN 2: INDEX TEST(S)</b>                                                                                      |         |      |         |         |         |         |         |         |      |
| <i>A. Risk of Bias</i>                                                                                              |         |      |         |         |         |         |         |         |      |
| Were the index test results interpreted without knowledge of the results of the reference standard?                 | Yes     | Yes  | Yes     | Yes     | Yes     | Yes     | Yes     | Yes     | Yes  |
| If a threshold was used, was it pre-specified?                                                                      | Yes     | Yes  | Yes     | Yes     | Yes     | Yes     | Yes     | Yes     | Yes  |
| Could the conduct or interpretation of the index test have introduced bias?                                         | Low     | Low  | Low     | Low     | Low     | Low     | Low     | Low     | Low  |
| <i>B. Concerns regarding applicability</i>                                                                          |         |      |         |         |         |         |         |         |      |
| Is there concern that the index test, its conduct, or interpretation differ from the review question?               | Low     | Low  | Low     | Low     | Low     | Low     | Low     | Low     | Low  |
| <b>DOMAIN 3: REFERENCE STANDARD</b>                                                                                 |         |      |         |         |         |         |         |         |      |
| <i>A. Risk of Bias</i>                                                                                              |         |      |         |         |         |         |         |         |      |
| Is the reference standard likely to correctly classify the target condition?                                        | Yes     | Yes  | Yes     | Yes     | Yes     | Yes     | Yes     | Yes     | Yes  |
| Were the reference standard results interpreted without knowledge of the results of the index test?                 | Unclear | Yes  | Yes     | Unclear | Yes     | Unclear | Unclear | Yes     | Yes  |
| Could the reference standard, its conduct, or its interpretation have introduced bias?                              | Unclear | Low  | Low     | Unclear | Low     | Unclear | Unclear | Low     | Low  |
| <i>B. Concerns regarding applicability</i>                                                                          |         |      |         |         |         |         |         |         |      |
| Is there concern that the target condition as defined by the reference standard does not match the review question? | Low     | Low  | Low     | Low     | Low     | Low     | Low     | Low     | Low  |
| <b>DOMAIN 4: FLOW AND TIMING</b>                                                                                    |         |      |         |         |         |         |         |         |      |
| <i>A. Risk of Bias</i>                                                                                              |         |      |         |         |         |         |         |         |      |
| Was there an appropriate interval between index test(s) and reference standard?                                     | Unclear | Yes  | Unclear | Unclear | Unclear | Unclear | Yes     | Unclear | Yes  |
| Did all patients receive a reference standard?                                                                      | Yes     | Yes  | Yes     | Yes     | No      | Yes     | Yes     | No      | No   |
| Did patients receive the same reference standard?                                                                   | Yes     | Yes  | Yes     | Yes     | Yes     | Yes     | Yes     | Yes     | Yes  |
| Were all patients included in the analysis?                                                                         | Yes     | Yes  | Yes     | Yes     | No      | Yes     | Yes     | No      | Yes  |
| Could the patient flow have introduced bias?                                                                        | Low     | Low  | Low     | Low     | High    | Low     | Low     | High    | Low  |

**Supplementary Table S4:** Newcastle-Ottawa Scale scores of the selected studies

|                                                                                                 | [38]           | [39] | [40] | [41] | [42] | [43] | [44] | [45] | [46] | [47] | [48] | [49] | [50] | [51] | [52] | [53] | [54] | [55] |    |
|-------------------------------------------------------------------------------------------------|----------------|------|------|------|------|------|------|------|------|------|------|------|------|------|------|------|------|------|----|
| <b>Selection: (Maximum 5 stars)</b>                                                             |                |      |      |      |      |      |      |      |      |      |      |      |      |      |      |      |      |      |    |
| Representativeness of the sample                                                                | *              | *    | *    | *    | *    | *    | *    | *    | *    | *    | *    | *    | *    | *    | *    | *    | *    | *    | *  |
| Sample size                                                                                     |                | **   | **   |      |      |      | *    |      |      |      |      |      |      |      |      |      | **   | *    |    |
| Non-respondents                                                                                 | Not Applicable |      |      |      |      |      |      |      |      |      |      |      |      |      |      |      |      |      |    |
| Ascertainment of the exposure                                                                   | **             | **   | **   | **   | **   | **   | **   | **   | **   | **   | **   | **   | **   | **   | **   | **   | **   | **   | ** |
| <b>Comparability: (Maximum 2 stars)</b>                                                         |                |      |      |      |      |      |      |      |      |      |      |      |      |      |      |      |      |      |    |
| The subjects in different outcome groups are comparable, based on the study design or analysis. | Not Applicable |      |      |      |      |      |      |      |      |      |      |      |      |      |      |      |      |      |    |
| Confounding factors are controlled                                                              | Not Applicable |      |      |      |      |      |      |      |      |      |      |      |      |      |      |      |      |      |    |
| <b>Outcome: (Maximum 3 stars)</b>                                                               |                |      |      |      |      |      |      |      |      |      |      |      |      |      |      |      |      |      |    |
| Assessment of the outcome                                                                       | **             | **   | **   | **   | **   | **   | **   | **   | **   | **   | **   | **   | **   | **   | **   | **   | **   | **   | ** |
| Statistical test                                                                                | *              | *    | *    | *    | *    | *    | *    | *    | *    | *    | *    | *    | *    | *    | *    | *    | *    | *    | *  |

**Supplementary Table S5:** Selection criteria used for participation in the studies

| Ref. | Inclusion Criteria                                                                                                        | Exclusion Criteria                                                                                                                                                         |
|------|---------------------------------------------------------------------------------------------------------------------------|----------------------------------------------------------------------------------------------------------------------------------------------------------------------------|
| [38] | Children attending the study hospital                                                                                     | Children without a proper birth record<br>Children not accompanied by a caregiver at the time of evaluation                                                                |
| [39] | Children living in the study area                                                                                         | Not applicable                                                                                                                                                             |
| [40] | Parents willing to participate                                                                                            | Not applicable                                                                                                                                                             |
| [41] | Children living in the study area                                                                                         | Not applicable                                                                                                                                                             |
| [42] | Very Low Birth Weight Children treated in NICU of the study hospital                                                      | Not applicable                                                                                                                                                             |
| [43] | Children living in the study area                                                                                         | Not applicable                                                                                                                                                             |
| [44] | Children whose parents/ primary caregiver gave consent                                                                    | Ill children<br>Children uncooperative for testing                                                                                                                         |
| [45] | Afrikaans, Tswana or English speaking parents or guardian                                                                 | Children suspected or diagnosed with mental retardation, autism or neuromotor delay                                                                                        |
| [46] | Children attending the study hospital                                                                                     | Children with acute illness<br>Children not accompanied by parents<br>Children whose parents did not give consent to participate                                           |
| [47] | Children with apparently normal development                                                                               | Children with acute and chronic disease<br>Children not accompanied by a caregiver<br>Children with illiterate caregiver                                                   |
| [48] | Parents completed primary education<br>Parents able to read Hindi<br>Parents living with the child                        | Premature children<br>Children with acute severe illness<br>Previous diagnosis of developmental disorder                                                                   |
| [49] | Children attending the study hospital                                                                                     | Premature children<br>Previous diagnosis of developmental delay<br>Children with a visual/hearing problem<br>The accompanying parent does not understand the Thai language |
| [50] | Parents willing to participate                                                                                            | Chronically ill children<br>Previous diagnosis of developmental delay                                                                                                      |
| [51] | Children living in the study area                                                                                         | Children whose parents did not give consent to participate                                                                                                                 |
| [52] | Afrikaans or English speaking parents<br>Parents visiting the primary health care clinics<br>Parents asked to participate | Not applicable                                                                                                                                                             |
| [53] | Children born to mothers enrolled in "Malaria in Pregnancy Preventive Alternative Drugs" trial                            | Non-singleton births                                                                                                                                                       |
| [54] | <b>Community:</b> Children living in the study area<br><b>Hospital:</b> Children attending the study hospital             | Not applicable                                                                                                                                                             |
| [55] | Not applicable                                                                                                            | Children with congenital malformation, acute illness and mental retardation                                                                                                |

**Supplementary Table S6:** List of Rejected Studies and Tools

|     | <b>Ref</b>                  | <b>Tool</b>       | <b>Reason of Rejection</b>                                                   |
|-----|-----------------------------|-------------------|------------------------------------------------------------------------------|
| 1.  | Biasini et al. 2015         | 12 month Screener | Tool Development<br>Intervention study                                       |
| 2.  | Wirz et al. 2005            | ACCESS Portfolio  | Disability Screening tool<br>Sensitivity-Specificity not measured            |
| 3.  | Ngoun et al. 2012           | AHC DMAT          | Tool development<br>1-6 years<br>Sensitivity-Specificity not measured        |
| 4.  | Kwun et al. 2014            | ASQ               | Validated in non LIMC country                                                |
| 5.  | Salomonsson et al. 2010     | ASQ:SE            | Validated in non LIMC country                                                |
| 6.  | Bian et al. 2017            | ASQ:SE            | Translation and adaptation<br>Sensitivity-Specificity not measured           |
| 7.  | Parveen et al. 2014         | BSID-II           | Assessment tool<br>Tool adaptation                                           |
| 8.  | Ranjitkar et al. 2018       | Bayley III        | Efficacy of vitamin B12<br>supplementation on growth<br>and neurodevelopment |
| 9.  | Rizzoli-Córdoba et al. 2015 | BDI-2 ST          | Prevalence study<br>English translation is not available                     |
| 10. | Kishore et al. 2018         | BDST              | Correlation Study<br>Sensitivity-Specificity not measured                    |
| 11. | Pathak et al. 1991          | BDST              | Preparing developmental curve<br>Sensitivity-Specificity not measured        |
| 12. | Guedes et al. 2011          | BINS              | Sensitivity-Specificity not clearly<br>documented                            |
| 13. | Sheldrick et al. 2013       | BPSC              | Validated in non LIMC country                                                |
| 14. | Glascocoe et al. 2005       | Brigance-II       | Validated in non LIMC country                                                |
| 15. | Ireton et al. 1996          | CDR-PQ            | Validated in non LIMC country                                                |
| 16. | Liao et al. 2008            | CDIIT             | Validated in non LIMC country                                                |
| 17. | McCoy et al. 2017           | CREDI             | Tool development,<br>Correlation study                                       |
| 18. | Altafim et al. 2018         | CREDI             | Sensitivity-Specificity not measured                                         |
| 19. | Wetherby et al. 2003        | CSBS-DP           | Validated in non LIMC country                                                |
| 20. | Nair et al. 2009            | DATA              | Tool development and standardization<br>Sensitivity-Specificity not measured |
| 21. | Nair et al. 2012            | DATA II           | Tool development                                                             |
| 22. | Luiz et al. 2004            | DDST II           | 3-6 years<br>Correlation study                                               |
| 23. | Wijedasa et al. 2011        | DDST II           | Adaptation and standardization                                               |
| 24. | Shahshahani et al. 2010     | DDST II           | 0-6 years                                                                    |
| 25. | Scherzer et al 2009         | DMChart           | 0-8 years<br>Sensitivity-Specificity not measured                            |
| 26. | Abubakar et al. 2009        | DMChecklist       | Correlation study<br>Sensitivity-Specificity not measured                    |
| 27. | Prado et al. 2014           | DMCchecklist II   | Correlation study<br>Sensitivity-Specificity not measured                    |
| 28. | Chopra et al. 1999          | DSS               | Disability Screening tool<br>0-6 years                                       |
| 29. | Velez et al. 2007           | EAD 1             | Prevalence Study                                                             |
| 30. | Rao et al. 2014             | EAP ECDS          | Assessment tool<br>36-71 months                                              |
| 31. | Janus et al. 2007           | EDI               | 4-6 years                                                                    |

|     |                                                |                |                                                                    |
|-----|------------------------------------------------|----------------|--------------------------------------------------------------------|
|     |                                                |                | Validated in non LIMC country                                      |
| 32. | Verdisco et al. 2015                           | Engle          | Correlation study<br>Sensitivity-Specificity not measured          |
| 33. | Schafer et al. 2014                            | ERIC           | Validated in non LIMC country                                      |
| 34. | Meisels et al. 1993                            | ESI-R          | 3-6 years<br>Validated in non LIMC country                         |
| 35. | Lenkarski et al. 2001                          | ESP            | Validated in non LIMC country                                      |
| 36. | Hatakenaka et al. 2016                         | ESSENCE-Q      | 0-6 years<br>Validated in non LIMC country                         |
| 37. | Munir et al. 1999                              | IBAS           | Assessment tool<br>1-10 years                                      |
| 38. | Gulati et al. 2014                             | INCLLEN-NDST   | 2-9 years                                                          |
| 39. | Fernandes et al. 2014<br>Murray et al. 2018    | Intergrowth-21 | Assessment tool                                                    |
| 40. | Abubakar et al. 2008                           | KDI            | Assessment tool<br>Part of sample consists of children with NDD    |
| 41. | Gladstone et al. 2008<br>Gladstone et al. 2010 | MDAT           | Assessment tool<br>0-6 years                                       |
| 42. | Hwang et al. 2015                              | MuSiC          | Validated in non LIMC country                                      |
| 43. | Arya et al. 1991                               | NIMH-DSS       | 0-6 years                                                          |
| 44. | Schroeder et al. 2014                          | PCQ            | Sensitivity-Specificity not clearly documented                     |
| 45. | Malik et al. 2007                              | PDST           | Sensitivity-Specificity not measured                               |
| 46. | Sheldrick et al. 2012                          | PPSC           | 1.5-5.5 years<br>Tool development<br>Validated in non LIMC country |
| 47. | Simonian and Tarnowski 2001                    | PSC            | 4-16 years                                                         |
| 48. | Boyede et al. 2016                             | Red Cross      | Validated among HIV infected children                              |
| 49. | Islam et al. 2016                              | RNDA           | Assessment tool<br>Prediction                                      |
| 50. | Ara et al. 2015                                | RNDA           | Prevalence of NDI                                                  |
| 51. | Khan et al. 2014                               | RNDA           | Assessment<br>2-9 years                                            |
| 52. | Haataja et al. 2002                            | Shoklo         | Assessment tool<br>Validated in non LIMC cohort                    |
| 53. | Sheldrick and Perrin 2013                      | SWYC           | Tool development                                                   |
| 54. | Wu et al. 2012                                 | TQP            | Association study                                                  |
| 55. | Pérez-Escamilla 2017                           |                | Spanish                                                            |

**Supplementary Table S7:** Example of culture-sensitive BSID-II items for Bangladeshi infants  
(adopted from [70])

|                 | <b>Original</b>                      | <b>Culture Sensitive</b>                |
|-----------------|--------------------------------------|-----------------------------------------|
| <b>Picture</b>  | Pomfret                              | Ilish                                   |
|                 | Star                                 | National Flag                           |
|                 | House with chimney                   | Tin-shed house                          |
| <b>Material</b> | Sugar pellet                         | Iron tablets                            |
|                 | Small toy (rabbit)                   | Small doll (boy or girl)                |
|                 | Thomas The Tank Engine Visits a Farm | Shishur Jotno' from 'Meena Raju Series' |
|                 | Sugar pellet                         | Iron tablets                            |
| <b>Word</b>     | Auto                                 | Vo                                      |
|                 | Leaf                                 | Pata/ Shak                              |

**Supplementary Table S8:** Basic properties of ASQ and PEDS (adopted from [76])

| <b>Characteristic</b>        | <b>PEDS</b>                                                                                                                       | <b>ASQ</b>                                                                                                |
|------------------------------|-----------------------------------------------------------------------------------------------------------------------------------|-----------------------------------------------------------------------------------------------------------|
| <b>Screening approach</b>    | Parents' developmental concerns                                                                                                   | Parents provide information about child's skills                                                          |
| <b>Age Range</b>             | 0 to 96 months                                                                                                                    | 1 to 66 months                                                                                            |
| <b>Questionnaire</b>         | One                                                                                                                               | 21 sets of questionnaire for 21 age groups                                                                |
| <b>Developmental domains</b> | Gross motor, Fine motor, Cognitive, Expressive language, Receptive language, Self-help, Social-emotional, Behavior, School, Other | Gross motor, Fine motor, Problem solving, Communication, Personal-social                                  |
| <b>Format</b>                | 10 questions covering 9 developmental concerns<br>Response options: no/yes/a little                                               | 30 questions covering 5 developmental domains<br>Response options: yes/sometimes/not yet                  |
| <b>Example of item</b>       | Expressive language: "Do you have any concerns about how your child talks and makes speech sounds?"                               | Communication skill at 18 months: "Does your child say 8 or more words in addition to 'Mama' and 'Dada'?" |
| <b>Time to screen</b>        | 5 min of parent time<br>1–2 min for provider/staff to score                                                                       | 10–15 min of parent time<br>1–2 min for provider/staff to score                                           |

| Section/topic             | # | Checklist item                                                                                                                                                                                                                                                                                              | Reported on page # |
|---------------------------|---|-------------------------------------------------------------------------------------------------------------------------------------------------------------------------------------------------------------------------------------------------------------------------------------------------------------|--------------------|
| <b>TITLE</b>              |   |                                                                                                                                                                                                                                                                                                             |                    |
| Title                     | 1 | Identify the report as a systematic review, meta-analysis, or both.                                                                                                                                                                                                                                         | 1                  |
| <b>ABSTRACT</b>           |   |                                                                                                                                                                                                                                                                                                             |                    |
| Structured summary        | 2 | Provide a structured summary including, as applicable: background; objectives; data sources; study eligibility criteria, participants, and interventions; study appraisal and synthesis methods; results; limitations; conclusions and implications of key findings; systematic review registration number. | 2-3                |
| <b>INTRODUCTION</b>       |   |                                                                                                                                                                                                                                                                                                             |                    |
| Rationale                 | 3 | Describe the rationale for the review in the context of what is already known.                                                                                                                                                                                                                              | 4-7                |
| Objectives                | 4 | Provide an explicit statement of questions being addressed with reference to participants, interventions, comparisons, outcomes, and study design (PICOS).                                                                                                                                                  | 7                  |
| <b>METHODS</b>            |   |                                                                                                                                                                                                                                                                                                             |                    |
| Protocol and registration | 5 | Indicate if a review protocol exists, if and where it can be accessed (e.g., Web address), and, if available, provide registration information including registration number.                                                                                                                               | 10-11              |
| Eligibility criteria      | 6 | Specify study characteristics (e.g., PICOS, length of follow-up) and report characteristics (e.g., years considered, language, publication status) used as criteria for eligibility, giving rationale.                                                                                                      | 8                  |
| Information sources       | 7 | Describe all information sources (e.g., databases with dates of coverage, contact with study authors to identify additional studies) in the search and date last searched.                                                                                                                                  | 7-8                |
| Search                    | 8 | Present full electronic search strategy for at least one database, including any limits used, such that it could be repeated.                                                                                                                                                                               | Table S1           |
| Study selection           | 9 | State the process for selecting studies (i.e., screening, eligibility, included in systematic review, and, if applicable, included in the meta-analysis).                                                                                                                                                   | 9-10               |



|                                    |    |                                                                                                                                                                                                                        |                          |
|------------------------------------|----|------------------------------------------------------------------------------------------------------------------------------------------------------------------------------------------------------------------------|--------------------------|
| Data collection process            | 10 | Describe method of data extraction from reports (e.g., piloted forms, independently, in duplicate) and any processes for obtaining and confirming data from investigators.                                             | 9-10                     |
| Data items                         | 11 | List and define all variables for which data were sought (e.g., PICOS, funding sources) and any assumptions and simplifications made.                                                                                  | 9-10                     |
| Risk of bias in individual studies | 12 | Describe methods used for assessing risk of bias of individual studies (including specification of whether this was done at the study or outcome level), and how this information is to be used in any data synthesis. | 9-10                     |
| Summary measures                   | 13 | State the principal summary measures (e.g., risk ratio, difference in means).                                                                                                                                          | Sensitivity, Specificity |
| Synthesis of results               | 14 | Describe the methods of handling data and combining results of studies, if done, including measures of consistency (e.g., $I^2$ ) for each meta-analysis.                                                              | N/A                      |

Page 1 of 2

| Section/topic               | #  | Checklist item                                                                                                                                                  | Reported on page # |
|-----------------------------|----|-----------------------------------------------------------------------------------------------------------------------------------------------------------------|--------------------|
| Risk of bias across studies | 15 | Specify any assessment of risk of bias that may affect the cumulative evidence (e.g., publication bias, selective reporting within studies).                    | N/A                |
| Additional analyses         | 16 | Describe methods of additional analyses (e.g., sensitivity or subgroup analyses, meta-regression), if done, indicating which were pre-specified.                | N/A                |
| <b>RESULTS</b>              |    |                                                                                                                                                                 |                    |
| Study selection             | 17 | Give numbers of studies screened, assessed for eligibility, and included in the review, with reasons for exclusions at each stage, ideally with a flow diagram. | Fig 1              |
| Study characteristics       | 18 | For each study, present characteristics for which data were extracted (e.g., study size, PICOS, follow-up period) and provide the citations.                    | 12                 |
| Risk of bias within studies | 19 | Present data on risk of bias of each study and, if available, any outcome level assessment (see item 12).                                                       | Table S3, S4       |

|                               |    |                                                                                                                                                                                                          |       |
|-------------------------------|----|----------------------------------------------------------------------------------------------------------------------------------------------------------------------------------------------------------|-------|
| Results of individual studies | 20 | For all outcomes considered (benefits or harms), present, for each study: (a) simple summary data for each intervention group (b) effect estimates and confidence intervals, ideally with a forest plot. | 12-22 |
| Synthesis of results          | 21 | Present results of each meta-analysis done, including confidence intervals and measures of consistency.                                                                                                  | N/A   |
| Risk of bias across studies   | 22 | Present results of any assessment of risk of bias across studies (see Item 15).                                                                                                                          | N/A   |
| Additional analysis           | 23 | Give results of additional analyses, if done (e.g., sensitivity or subgroup analyses, meta-regression [see Item 16]).                                                                                    | N/A   |
| <b>DISCUSSION</b>             |    |                                                                                                                                                                                                          |       |
| Summary of evidence           | 24 | Summarize the main findings including the strength of evidence for each main outcome; consider their relevance to key groups (e.g., healthcare providers, users, and policy makers).                     | 22-26 |
| Limitations                   | 25 | Discuss limitations at study and outcome level (e.g., risk of bias), and at review-level (e.g., incomplete retrieval of identified research, reporting bias).                                            | 26-27 |
| Conclusions                   | 26 | Provide a general interpretation of the results in the context of other evidence, and implications for future research.                                                                                  | 28    |
| <b>FUNDING</b>                |    |                                                                                                                                                                                                          |       |
| Funding                       | 27 | Describe sources of funding for the systematic review and other support (e.g., supply of data); role of funders for the systematic review.                                                               | 29    |

From: Moher D, Liberati A, Tetzlaff J, Altman DG, The PRISMA Group (2009). Preferred Reporting Items for Systematic Reviews and Meta-Analyses: The PRISMA Statement. PLoS Med 6(6): e1000097. doi:10.1371/journal.pmed1000097

For more information, visit: [www.prisma-statement.org](http://www.prisma-statement.org).
