# Supplementary material for: Screening tools for early identification of children with developmental delay in low- and middle-income countries: a systematic review
Source: PubMed Central journal article supplement — BMJ Open. 2020 Nov 23;10(11):e038182. doi: 10.1136/bmjopen-2020-038182 (PMC7684835; doi:10.1136/bmjopen-2020-038182), 2020-11-23
Supplement: bmjopen-2020-038182supp001.pdf [file bmjopen-2020-038182supp001.pdf]

**Supplementary Figure S1:** Correlation between NMR and Prevalence of DD (Taiwan 1997-2008)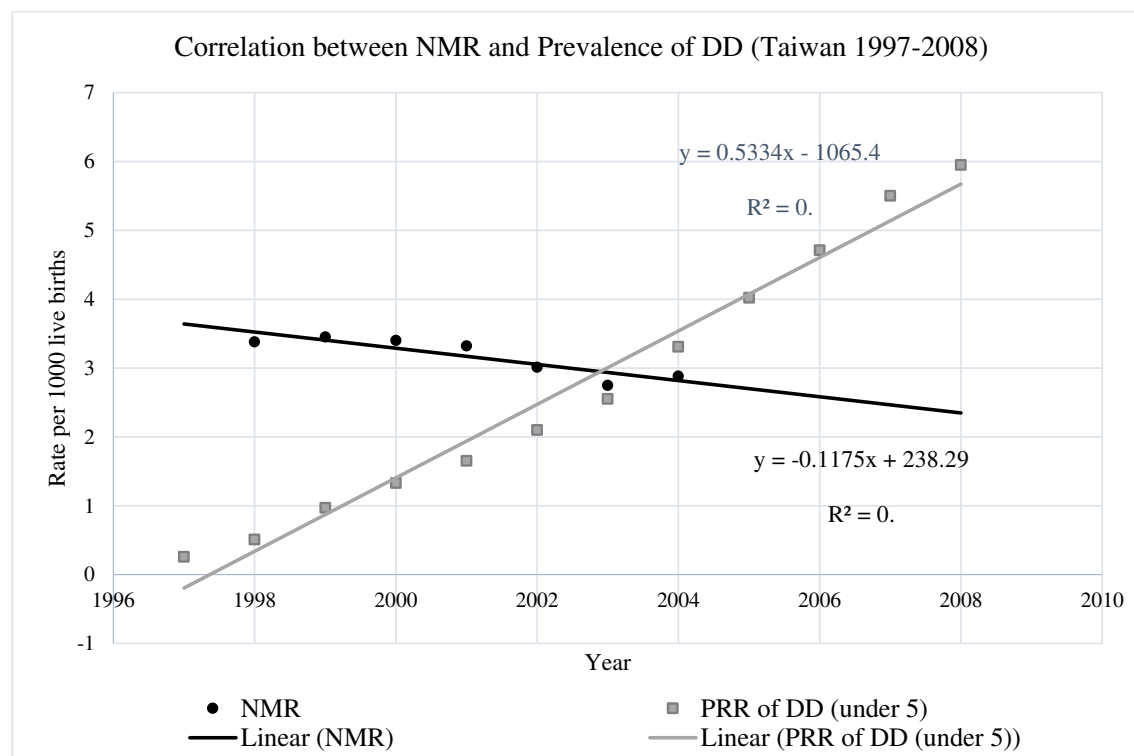**Figure S1:** Correlation between neonatal mortality rate and prevalence of developmental delay (Taiwan 1997-2008)

Footnote: We have used prevalence of developmental delay among under 5 children (1997-2008) from a nation-wide population based retrospective study [18] and neonatal mortality rate (1998-2004) from another study [19]. It was revealed that the prevalence of developmental delay is positively associated with time and negatively associated with NMR. So, it can be said that, with time, while neonatal mortality rate is reducing, the prevalence of developmental delay is gradually increasing.

**Supplementary Table S1: Medline search strategy****MEDLINE: Systematic review - screening for disorders in children in LMIC (as at 05.03.18)****Notes: No date or language limits applied.**

Database: Ovid MEDLINE &lt;1946 to 2018 February 28&gt; (Phase 1)

## Search Strategy:

```

-----
1  exp Mass Screening/ (114856)
2  screen$.tw. (543259)
3  exp DIAGNOSIS/ (7780076)
4  (early adj5 (diagnos$ or identif$ or detect$ or discover$)).tw. (179324)
5  1 or 2 or 3 or 4 (8132793)
6  exp "Surveys and Questionnaires"/ (881308)
7  (survey$ or questionnaire$).tw. (745680)
8  (instrument$ or tool$).tw. (665937)
9  6 or 7 or 8 (1849661)
10 5 and 9 (774120)
11 exp Neurodevelopmental Disorders/ (162135)
12 exp Motor Disorders/ (197)
13 exp Cerebral Palsy/ (18455)
14 (cerebral adj pals$).tw. (17316)
15 CP.tw. (36947)
16 exp Cognitive Dysfunction/ (7530)
17 exp Communication Disorders/ (59072)
18 ((development$ or motor$ or speech$ or cogniti$ or behav$) adj5 (disorder$ or disabilit$ or condition$ or
impair$ or deficit$)).tw. (200268)
19 11 or 12 or 13 or 14 or 15 or 16 or 17 or 18 (415783)
20 10 and 19 (27683)
21 exp Developing Countries/ (69408)
22 exp ASIA/ (698877)
23 exp AFRICA/ (230576)
24 exp South America/ (134532)
25 asia$.tw. (100200)
26 africa$.tw. (169185)
27 (south adj1 america$).tw. (14876)
28 (low adj2 income adj2 countr$).tw. (4196)
29 (middle adj2 income adj2 countr$).tw. (7713)
30 LMIC.tw. (649)
31 21 or 22 or 23 or 24 or 25 or 26 or 27 or 28 or 29 or 30 (1214625)
32 20 and 31 (2207)
33 limit 32 to humans (2185)
34 remove duplicates from 33 (2183)
35 limit 34 to "all child (0 to 18 years)" (1270)
36 exp INFANT/ (1056001)
37 exp CHILD/ (1753019)
38 exp ADOLESCENT/ (1842871)
39 (paediatric$ or pediatric$ or child$ or adolescen$ or teen$ or infant$ or baby or babies).tw. (1586099)
40 36 or 37 or 38 or 39 (3520016)
41 34 and 40 (1313)
42 35 or 41 (1313)
*****

```

Database: Ovid MEDLINE(R) ALL <1946 to July 13, 2020> (Phase 2)

Search Strategy:

-----  
1 exp Mass Screening/ (127799)  
2 screen\$.tw. (748410)  
3 exp DIAGNOSIS/ (8521264)  
4 (early adj5 (diagnos\$ or identif\$ or detect\$ or discover\$)).tw. (247525)  
5 1 or 2 or 3 or 4 (9082816)  
6 exp "Surveys and Questionnaires"/ (1030942)  
7 (survey\$ or questionnaire\$).tw. (1039336)  
8 (instrument\$ or tool\$).tw. (981681)  
9 6 or 7 or 8 (2492583)  
10 5 and 9 (930528)  
11 exp Neurodevelopmental Disorders/ (180714)  
12 exp Motor Disorders/ (480)  
13 exp Cerebral Palsy/ (20558)  
14 (cerebral adj pals\$).tw. (22436)  
15 CP.tw. (54326)  
16 exp Cognitive Dysfunction/ (17245)  
17 exp Communication Disorders/ (63349)  
18 ((development\$ or motor\$ or speech\$ or cogniti\$ or behav\$) adj5 (disorder\$ or disabilit\$ or condition\$ or impair\$ or deficit\$)).tw. (283402)  
19 11 or 12 or 13 or 14 or 15 or 16 or 17 or 18 (537248)  
20 10 and 19 (34449)  
21 exp Developing Countries/ (74723)  
22 exp ASIA/ (832820)  
23 exp AFRICA/ (265707)  
24 exp South America/ (161136)  
25 asia\$.tw. (146545)  
26 africa\$.tw. (228897)  
27 (south adj1 america\$).tw. (21374)  
28 (low adj2 income adj2 countr\$).tw. (7421)  
29 (middle adj2 income adj2 countr\$).tw. (18310)  
30 LMIC.tw. (1795)  
31 21 or 22 or 23 or 24 or 25 or 26 or 27 or 28 or 29 or 30 (1497552)  
32 20 and 31 (2846)  
33 limit 32 to humans (2778)  
34 limit 33 to "all child (0 to 18 years)" (1553)  
35 exp INFANT/ (1136560)  
36 exp CHILD/ (1905000)  
37 exp ADOLESCENT/ (2022225)  
38 (paediatric\$ or pediatric\$ or child\$ or adolescen\$ or teen\$ or infant\$ or baby or babies).tw. (1999177)  
39 35 or 36 or 37 or 38 (4073700)  
40 33 and 39 (1614)  
41 34 or 40 (1614)  
42 limit 41 to yr="2018 -Current" (242)  
\*\*\*\*\*

**Supplementary Table S2:** List of key definitions regarding study selection

| <b>Key words</b>                | <b>Definitions</b>                                                                                                                                                                                                           |
|---------------------------------|------------------------------------------------------------------------------------------------------------------------------------------------------------------------------------------------------------------------------|
| <b>Assessment</b>               | Assessment is a process for defining the nature of that problem, determining a diagnosis, and developing specific treatment recommendations for addressing the problem or diagnosis.                                         |
| <b>Developmental Assessment</b> | In-depth examination of child's development conducted by developmental pediatrician/ child psychologist                                                                                                                      |
| <b>Developmental Delay</b>      | A condition where a child does not reach it's developmental milestones at the expected times                                                                                                                                 |
| <b>Developmental Disability</b> | The severe and chronic form of developmental delay which is expected to continue indefinitely and substantially restricts the individual's daily living activities                                                           |
| <b>Developmental Domain</b>     | A collective term used to describe different aspects of brain growth and development                                                                                                                                         |
| <b>Developmental Monitoring</b> | Observing child's developmental progress by parents/ caregivers                                                                                                                                                              |
| <b>Developmental Screening</b>  | Looking for specific developmental concern by doctors/ healthcare professionals using brief questionnaire/ checklist                                                                                                         |
| <b>Disability</b>               | any restriction or lack (resulting from an impairment) of ability to perform an activity in the manner or within the range considered normal for a human being.                                                              |
| <b>Gray Literature</b>          | Research that is either unpublished or has been published in non-commercial form. Example: government reports, conference proceedings, pre-prints and post-prints of articles, theses and dissertations, etc.                |
| <b>Hand Searching</b>           | The page-by-page examination of journal issues, conference proceedings, reference lists of journal articles and other publications for relevant studies                                                                      |
| <b>Impairment</b>               | any loss or abnormality of psychological, physiological or anatomical structure or function.                                                                                                                                 |
| <b>Item</b>                     | List of activities under a screening tool or questionnaire                                                                                                                                                                   |
| <b>Monitoring</b>               | monitoring involves routine evaluation of changes to health or health risks                                                                                                                                                  |
| <b>Original Article</b>         | It is the report of a study written by the researchers who conducted the study                                                                                                                                               |
| <b>Psychometric Properties</b>  | Psychometric properties refer to the reliability and validity of a test                                                                                                                                                      |
| <b>Reliability</b>              | Reliability refers to the extent to which an assessment/ screening tool produces stable and consistent results                                                                                                               |
| <b>Review Article</b>           | Critical and constructive analysis of existing published literature in a field, considered as secondary literature.                                                                                                          |
| <b>Screening</b>                | Screening is a process for evaluating the possible presence of a particular problem. The outcome is normally a simple yes or no                                                                                              |
| <b>Sensitivity</b>              | The ability of a test to correctly identify those who have the disease                                                                                                                                                       |
| <b>specificity</b>              | The ability of a test to correctly identify those who do not have the disease                                                                                                                                                |
| <b>Surveillance</b>             | Ongoing systematic collection of health data essential to the planning, implementation and evaluation of the public health practice closely integrated with the timely dissemination of these data to those who need to know |
| <b>Validity</b>                 | The ability of a test to distinguish between who has a disease and who does not                                                                                                                                              |

**Supplementary Table S3: Quality Assessment Tool for Diagnostic Accuracy Studies-2 rating of the selected studies (Part 1)**

|                                                                                                                     | [38] | [39]    | [40]    | [41]    | [42]    | [43]    | [44]    | [45]    | [46]    |
|---------------------------------------------------------------------------------------------------------------------|------|---------|---------|---------|---------|---------|---------|---------|---------|
| <b>DOMAIN 1: PATIENT SELECTION</b>                                                                                  |      |         |         |         |         |         |         |         |         |
| <i>A. Risk of Bias</i>                                                                                              |      |         |         |         |         |         |         |         |         |
| Was a consecutive or random sample of patients enrolled?                                                            | No   | Yes     | Yes     | Yes     | Yes     | Yes     | Yes     | No      | No      |
| Was a case-control design avoided?                                                                                  | Yes  | Yes     | Yes     | Yes     | Yes     | Yes     | Yes     | Yes     | Yes     |
| Did the study avoid inappropriate exclusions?                                                                       | Yes  | Unclear | Unclear | Unclear | Unclear | Unclear | Yes     | Yes     | Yes     |
| Could the selection of patients have introduced bias?                                                               | High | Unclear | Unclear | Unclear | Unclear | Unclear | Low     | High    | High    |
| <i>B. Concerns regarding applicability</i>                                                                          |      |         |         |         |         |         |         |         |         |
| Is there concern that the included patients do not match the review question?                                       | Low  | Low     | Low     | Low     | Low     | Low     | Low     | Low     | Low     |
| <b>DOMAIN 2: INDEX TEST(S)</b>                                                                                      |      |         |         |         |         |         |         |         |         |
| <i>A. Risk of Bias</i>                                                                                              |      |         |         |         |         |         |         |         |         |
| Were the index test results interpreted without knowledge of the results of the reference standard?                 | Yes  | Yes     | Yes     | Yes     | Yes     | Yes     | Yes     | Yes     | Yes     |
| If a threshold was used, was it pre-specified?                                                                      | Yes  | Yes     | Yes     | Yes     | Yes     | Yes     | Yes     | Yes     | Yes     |
| Could the conduct or interpretation of the index test have introduced bias?                                         | Low  | Low     | Low     | Low     | Low     | Low     | Low     | Low     | Low     |
| <i>B. Concerns regarding applicability</i>                                                                          |      |         |         |         |         |         |         |         |         |
| Is there concern that the index test, its conduct, or interpretation differ from the review question?               | Low  | Low     | Low     | Low     | Low     | Low     | Low     | Low     | Low     |
| <b>DOMAIN 3: REFERENCE STANDARD</b>                                                                                 |      |         |         |         |         |         |         |         |         |
| <i>A. Risk of Bias</i>                                                                                              |      |         |         |         |         |         |         |         |         |
| Is the reference standard likely to correctly classify the target condition?                                        | Yes  | Yes     | Yes     | Yes     | Yes     | Yes     | Yes     | Yes     | Yes     |
| Were the reference standard results interpreted without knowledge of the results of the index test?                 | Yes  | Yes     | Yes     | Yes     | Yes     | Unclear | Yes     | Yes     | Yes     |
| Could the reference standard, its conduct, or its interpretation have introduced bias?                              | Low  | Low     | Low     | Low     | Low     | Unclear | Low     | Low     | Low     |
| <i>B. Concerns regarding applicability</i>                                                                          |      |         |         |         |         |         |         |         |         |
| Is there concern that the target condition as defined by the reference standard does not match the review question? | Low  | Low     | Low     | Low     | Low     | Low     | Low     | Low     | Low     |
| <b>DOMAIN 4: FLOW AND TIMING</b>                                                                                    |      |         |         |         |         |         |         |         |         |
| <i>A. Risk of Bias</i>                                                                                              |      |         |         |         |         |         |         |         |         |
| Was there an appropriate interval between index test(s) and reference standard?                                     | No   | Yes     | Yes     | Yes     | Yes     | Yes     | Unclear | Unclear | Unclear |
| Did all patients receive a reference standard?                                                                      | Yes  | Yes     | Yes     | No      | Yes     | No      | No      | No      | Yes     |
| Did patients receive the same reference standard?                                                                   | Yes  | Yea     | Yea     | Yes     | Yea     | Yes     | Yes     | Yes     | No      |
| Were all patients included in the analysis?                                                                         | Yes  | Yes     | Yes     | Yes     | Yes     | No      | No      | No      | Yes     |
| Could the patient flow have introduced bias?                                                                        | Low  | Low     | Low     | Low     | Low     | High    | Unclear | Unclear | Low     |

**Supplementary Table S3: Quality Assessment Tool for Diagnostic Accuracy Studies-2 rating of the selected studies (Part 2)**

|                                                                                                                     | [47]    | [48] | [49]    | [50]    | [51]    | [52]    | [53]    | [54]    | [55] |
|---------------------------------------------------------------------------------------------------------------------|---------|------|---------|---------|---------|---------|---------|---------|------|
| <b>DOMAIN 1: PATIENT SELECTION</b>                                                                                  |         |      |         |         |         |         |         |         |      |
| <i>A. Risk of Bias</i>                                                                                              |         |      |         |         |         |         |         |         |      |
| Was a consecutive or random sample of patients enrolled?                                                            | No      | No   | No      | No      | Yes     | No      | Yes     | Yes     | Yes  |
| Was a case-control design avoided?                                                                                  | Yes     | Yes  | Yes     | Yes     | Yes     | Yes     | Yes     | Yes     | Yes  |
| Did the study avoid inappropriate exclusions?                                                                       | Yes     | Yes  | Yes     | Yes     | Yes     | Unclear | Unclear | Yes     | Yes  |
| Could the selection of patients have introduced bias?                                                               | High    | High | High    | High    | Low     | Unclear | Unclear | Low     | Low  |
| <i>B. Concerns regarding applicability</i>                                                                          |         |      |         |         |         |         |         |         |      |
| Is there concern that the included patients do not match the review question?                                       | Low     | Low  | Low     | Low     | Low     | Low     | Low     | Low     | Low  |
| <b>DOMAIN 2: INDEX TEST(S)</b>                                                                                      |         |      |         |         |         |         |         |         |      |
| <i>A. Risk of Bias</i>                                                                                              |         |      |         |         |         |         |         |         |      |
| Were the index test results interpreted without knowledge of the results of the reference standard?                 | Yes     | Yes  | Yes     | Yes     | Yes     | Yes     | Yes     | Yes     | Yes  |
| If a threshold was used, was it pre-specified?                                                                      | Yes     | Yes  | Yes     | Yes     | Yes     | Yes     | Yes     | Yes     | Yes  |
| Could the conduct or interpretation of the index test have introduced bias?                                         | Low     | Low  | Low     | Low     | Low     | Low     | Low     | Low     | Low  |
| <i>B. Concerns regarding applicability</i>                                                                          |         |      |         |         |         |         |         |         |      |
| Is there concern that the index test, its conduct, or interpretation differ from the review question?               | Low     | Low  | Low     | Low     | Low     | Low     | Low     | Low     | Low  |
| <b>DOMAIN 3: REFERENCE STANDARD</b>                                                                                 |         |      |         |         |         |         |         |         |      |
| <i>A. Risk of Bias</i>                                                                                              |         |      |         |         |         |         |         |         |      |
| Is the reference standard likely to correctly classify the target condition?                                        | Yes     | Yes  | Yes     | Yes     | Yes     | Yes     | Yes     | Yes     | Yes  |
| Were the reference standard results interpreted without knowledge of the results of the index test?                 | Unclear | Yes  | Yes     | Unclear | Yes     | Unclear | Unclear | Yes     | Yes  |
| Could the reference standard, its conduct, or its interpretation have introduced bias?                              | Unclear | Low  | Low     | Unclear | Low     | Unclear | Unclear | Low     | Low  |
| <i>B. Concerns regarding applicability</i>                                                                          |         |      |         |         |         |         |         |         |      |
| Is there concern that the target condition as defined by the reference standard does not match the review question? | Low     | Low  | Low     | Low     | Low     | Low     | Low     | Low     | Low  |
| <b>DOMAIN 4: FLOW AND TIMING</b>                                                                                    |         |      |         |         |         |         |         |         |      |
| <i>A. Risk of Bias</i>                                                                                              |         |      |         |         |         |         |         |         |      |
| Was there an appropriate interval between index test(s) and reference standard?                                     | Unclear | Yes  | Unclear | Unclear | Unclear | Unclear | Yes     | Unclear | Yes  |
| Did all patients receive a reference standard?                                                                      | Yes     | Yes  | Yes     | Yes     | No      | Yes     | Yes     | No      | No   |
| Did patients receive the same reference standard?                                                                   | Yes     | Yes  | Yes     | Yes     | Yes     | Yes     | Yes     | Yes     | Yes  |
| Were all patients included in the analysis?                                                                         | Yes     | Yes  | Yes     | Yes     | No      | Yes     | Yes     | No      | Yes  |
| Could the patient flow have introduced bias?                                                                        | Low     | Low  | Low     | Low     | High    | Low     | Low     | High    | Low  |

**Supplementary Table S4:** Newcastle-Ottawa Scale scores of the selected studies

|                                                                                                                                       | [38]           | [39] | [40] | [41] | [42] | [43] | [44] | [45] | [46] | [47] | [48] | [49] | [50] | [51] | [52] | [53] | [54] | [55] |
|---------------------------------------------------------------------------------------------------------------------------------------|----------------|------|------|------|------|------|------|------|------|------|------|------|------|------|------|------|------|------|
| <b>Selection: (Maximum 5 stars)</b>                                                                                                   |                |      |      |      |      |      |      |      |      |      |      |      |      |      |      |      |      |      |
| Representativeness of the sample                                                                                                      | *              | *    | *    | *    | *    | *    | *    | *    | *    | *    | *    | *    | *    | *    | *    | *    | *    | *    |
| Sample size                                                                                                                           |                | **   | **   |      |      |      | *    |      |      |      |      |      |      |      |      |      | **   | *    |
| Non-respondents                                                                                                                       | Not Applicable |      |      |      |      |      |      |      |      |      |      |      |      |      |      |      |      |      |
| Ascertainment of the exposure                                                                                                         | **             | **   | **   | **   | **   | **   | **   | **   | **   | **   | **   | **   | **   | **   | **   | **   | **   | **   |
| <b>Comparability: (Maximum 2 stars)</b>                                                                                               |                |      |      |      |      |      |      |      |      |      |      |      |      |      |      |      |      |      |
| The subjects in different outcome groups are comparable, based on the study design or analysis.<br>Confounding factors are controlled | Not Applicable |      |      |      |      |      |      |      |      |      |      |      |      |      |      |      |      |      |
| <b>Outcome: (Maximum 3 stars)</b>                                                                                                     |                |      |      |      |      |      |      |      |      |      |      |      |      |      |      |      |      |      |
| Assessment of the outcome                                                                                                             | **             | **   | **   | **   | **   | **   | **   | **   | **   | **   | **   | **   | **   | **   | **   | **   | **   | **   |
| Statistical test                                                                                                                      | *              | *    | *    | *    | *    | *    | *    | *    |      | *    | *    | *    | *    | *    | *    | *    | *    | *    |

**Supplementary Table S5:** Selection criteria used for participation in the studies

| Ref. | Inclusion Criteria                                                                                                        | Exclusion Criteria                                                                                                                                                         |
|------|---------------------------------------------------------------------------------------------------------------------------|----------------------------------------------------------------------------------------------------------------------------------------------------------------------------|
| [38] | Children attending the study hospital                                                                                     | Children without a proper birth record<br>Children not accompanied by a caregiver at the time of evaluation                                                                |
| [39] | Children living in the study area                                                                                         | Not applicable                                                                                                                                                             |
| [40] | Parents willing to participate                                                                                            | Not applicable                                                                                                                                                             |
| [41] | Children living in the study area                                                                                         | Not applicable                                                                                                                                                             |
| [42] | Very Low Birth Weight Children treated in NICU of the study hospital                                                      | Not applicable                                                                                                                                                             |
| [43] | Children living in the study area                                                                                         | Not applicable                                                                                                                                                             |
| [44] | Children whose parents/ primary caregiver gave consent                                                                    | Ill children<br>Children uncooperative for testing                                                                                                                         |
| [45] | Afrikaans, Tswana or English speaking parents or guardian                                                                 | Children suspected or diagnosed with mental retardation, autism or neuromotor delay                                                                                        |
| [46] | Children attending the study hospital                                                                                     | Children with acute illness<br>Children not accompanied by parents<br>Children whose parents did not give consent to participate                                           |
| [47] | Children with apparently normal development                                                                               | Children with acute and chronic disease<br>Children not accompanied by a caregiver<br>Children with illiterate caregiver                                                   |
| [48] | Parents completed primary education<br>Parents able to read Hindi<br>Parents living with the child                        | Premature children<br>Children with acute severe illness<br>Previous diagnosis of developmental disorder                                                                   |
| [49] | Children attending the study hospital                                                                                     | Premature children<br>Previous diagnosis of developmental delay<br>Children with a visual/hearing problem<br>The accompanying parent does not understand the Thai language |
| [50] | Parents willing to participate                                                                                            | Chronically ill children<br>Previous diagnosis of developmental delay                                                                                                      |
| [51] | Children living in the study area                                                                                         | Children whose parents did not give consent to participate                                                                                                                 |
| [52] | Afrikaans or English speaking parents<br>Parents visiting the primary health care clinics<br>Parents asked to participate | Not applicable                                                                                                                                                             |
| [53] | Children born to mothers enrolled in "Malaria in Pregnancy Preventive Alternative Drugs" trial                            | Non-singleton births                                                                                                                                                       |
| [54] | <b>Community:</b> Children living in the study area<br><b>Hospital:</b> Children attending the study hospital             | Not applicable                                                                                                                                                             |
| [55] | Not applicable                                                                                                            | Children with congenital malformation, acute illness and mental retardation                                                                                                |



**Supplementary Table S6: List of Rejected Studies and Tools**

|     | <b>Ref</b>                  | <b>Tool</b>       | <b>Reason of Rejection</b>                                                   |
|-----|-----------------------------|-------------------|------------------------------------------------------------------------------|
| 1.  | Biasini et al. 2015         | 12 month Screener | Tool Development<br>Intervention study                                       |
| 2.  | Wirz et al. 2005            | ACCESS Portfolio  | Disability Screening tool<br>Sensitivity-Specificity not measured            |
| 3.  | Ngoun et al. 2012           | AHC DMAT          | Tool development<br>1-6 years<br>Sensitivity-Specificity not measured        |
| 4.  | Kwun et al. 2014            | ASQ               | Validated in non LIMC country                                                |
| 5.  | Salomonsson et al. 2010     | ASQ:SE            | Validated in non LIMC country                                                |
| 6.  | Bian et al. 2017            | ASQ:SE            | Translation and adaptation<br>Sensitivity-Specificity not measured           |
| 7.  | Parveen et al. 2014         | BSID-II           | Assessment tool<br>Tool adaptation                                           |
| 8.  | Ranjitkar et al. 2018       | Bayley III        | Efficacy of vitamin B12<br>supplementation on growth<br>and neurodevelopment |
| 9.  | Rizzoli-Córdoba et al. 2015 | BDI-2 ST          | Prevalence study<br>English translation is not available                     |
| 10. | Kishore et al. 2018         | BDST              | Correlation Study<br>Sensitivity-Specificity not measured                    |
| 11. | Pathak et al. 1991          | BDST              | Preparing developmental curve<br>Sensitivity-Specificity not measured        |
| 12. | Guedes et al. 2011          | BINS              | Sensitivity-Specificity not clearly<br>documented                            |
| 13. | Sheldrick et al. 2013       | BPSC              | Validated in non LIMC country                                                |
| 14. | Glascoe et al. 2005         | Brigance-II       | Validated in non LIMC country                                                |
| 15. | Ireton et al. 1996          | CDR-PQ            | Validated in non LIMC country                                                |
| 16. | Liao et al. 2008            | CDIIT             | Validated in non LIMC country                                                |
| 17. | McCoy et al. 2017           | CREDI             | Tool development,<br>Correlation study                                       |
| 18. | Altafim et al. 2018         | CREDI             | Sensitivity-Specificity not measured                                         |
| 19. | Wetherby et al. 2003        | CSBS-DP           | Validated in non LIMC country                                                |
| 20. | Nair et al. 2009            | DATA              | Tool development and standardization<br>Sensitivity-Specificity not measured |
| 21. | Nair et al. 2012            | DATA II           | Tool development                                                             |
| 22. | Luiz et al. 2004            | DDST II           | 3-6 years<br>Correlation study                                               |
| 23. | Wijedasa et al. 2011        | DDST II           | Adaptation and standardization                                               |
| 24. | Shahshahani et al. 2010     | DDST II           | 0-6 years                                                                    |
| 25. | Scherzer et al 2009         | DMChart           | 0-8 years<br>Sensitivity-Specificity not measured                            |
| 26. | Abubakar et al. 2009        | DMChecklist       | Correlation study<br>Sensitivity-Specificity not measured                    |
| 27. | Prado et al. 2014           | DMCchecklist II   | Correlation study<br>Sensitivity-Specificity not measured                    |
| 28. | Chopra et al. 1999          | DSS               | Disability Screening tool<br>0-6 years                                       |
| 29. | Velez et al. 2007           | EAD 1             | Prevalence Study                                                             |
| 30. | Rao et al. 2014             | EAP ECDS          | Assessment tool<br>36-71 months                                              |
| 31. | Janus et al. 2007           | EDI               | 4-6 years                                                                    |

|     |                                                |                |                                                                    |
|-----|------------------------------------------------|----------------|--------------------------------------------------------------------|
|     |                                                |                | Validated in non LIMC country                                      |
| 32. | Verdisco et al. 2015                           | Engle          | Correlation study<br>Sensitivity-Specificity not measured          |
| 33. | Schafer et al. 2014                            | ERIC           | Validated in non LIMC country                                      |
| 34. | Meisels et al. 1993                            | ESI-R          | 3-6 years<br>Validated in non LIMC country                         |
| 35. | Lenkarski et al. 2001                          | ESP            | Validated in non LIMC country                                      |
| 36. | Hatakenaka et al. 2016                         | ESSENCE-Q      | 0-6 years<br>Validated in non LIMC country                         |
| 37. | Munir et al. 1999                              | IBAS           | Assessment tool<br>1-10 years                                      |
| 38. | Gulati et al. 2014                             | INCLLEN-NDST   | 2-9 years                                                          |
| 39. | Fernandes et al. 2014<br>Murray et al. 2018    | Intergrowth-21 | Assessment tool                                                    |
| 40. | Abubakar et al. 2008                           | KDI            | Assessment tool<br>Part of sample consists of children with NDD    |
| 41. | Gladstone et al. 2008<br>Gladstone et al. 2010 | MDAT           | Assessment tool<br>0-6 years                                       |
| 42. | Hwang et al. 2015                              | MuSiC          | Validated in non LIMC country                                      |
| 43. | Arya et al. 1991                               | NIMH-DSS       | 0-6 years                                                          |
| 44. | Schroeder et al. 2014                          | PCQ            | Sensitivity-Specificity not clearly documented                     |
| 45. | Malik et al. 2007                              | PDST           | Sensitivity-Specificity not measured                               |
| 46. | Sheldrick et al. 2012                          | PPSC           | 1.5-5.5 years<br>Tool development<br>Validated in non LIMC country |
| 47. | Simonian and Tarnowski 2001                    | PSC            | 4-16 years                                                         |
| 48. | Boyede et al. 2016                             | Red Cross      | Validated among HIV infected children                              |
| 49. | Islam et al. 2016                              | RNDA           | Assessment tool<br>Prediction                                      |
| 50. | Ara et al. 2015                                | RNDA           | Prevalence of NDI                                                  |
| 51. | Khan et al. 2014                               | RNDA           | Assessment<br>2-9 years                                            |
| 52. | Haataja et al. 2002                            | Shoklo         | Assessment tool<br>Validated in non LIMC cohort                    |
| 53. | Sheldrick and Perrin 2013                      | SWYC           | Tool development                                                   |
| 54. | Wu et al. 2012                                 | TQP            | Association study                                                  |
| 55. | Pérez-Escamilla 2017                           |                | Spanish                                                            |

**Supplementary Table S7:** Example of culture-sensitive BSID-II items for Bangladeshi infants (adopted from [70])

|                 | <b>Original</b>                      | <b>Culture Sensitive</b>                |
|-----------------|--------------------------------------|-----------------------------------------|
| <b>Picture</b>  | Pomfret                              | Ilish                                   |
|                 | Star                                 | National Flag                           |
|                 | House with chimney                   | Tin-shed house                          |
| <b>Material</b> | Sugar pellet                         | Iron tablets                            |
|                 | Small toy (rabbit)                   | Small doll (boy or girl)                |
|                 | Thomas The Tank Engine Visits a Farm | Shishur Jotno' from 'Meena Raju Series' |
|                 | Sugar pellet                         | Iron tablets                            |
| <b>Word</b>     | Auto                                 | Vo                                      |
|                 | Leaf                                 | Pata/ Shak                              |

**Supplementary Table S8:** Basic properties of ASQ and PEDS (adopted from [76])

| <b>Characteristic</b>        | <b>PEDS</b>                                                                                                                       | <b>ASQ</b>                                                                                                |
|------------------------------|-----------------------------------------------------------------------------------------------------------------------------------|-----------------------------------------------------------------------------------------------------------|
| <b>Screening approach</b>    | Parents' developmental concerns                                                                                                   | Parents provide information about child's skills                                                          |
| <b>Age Range</b>             | 0 to 96 months                                                                                                                    | 1 to 66 months                                                                                            |
| <b>Questionnaire</b>         | One                                                                                                                               | 21 sets of questionnaire for 21 age groups                                                                |
| <b>Developmental domains</b> | Gross motor, Fine motor, Cognitive, Expressive language, Receptive language, Self-help, Social-emotional, Behavior, School, Other | Gross motor, Fine motor, Problem solving, Communication, Personal-social                                  |
| <b>Format</b>                | 10 questions covering 9 developmental concerns<br>Response options: no/yes/a little                                               | 30 questions covering 5 developmental domains<br>Response options: yes/sometimes/not yet                  |
| <b>Example of item</b>       | Expressive language: "Do you have any concerns about how your child talks and makes speech sounds?"                               | Communication skill at 18 months: "Does your child say 8 or more words in addition to 'Mama' and 'Dada'?" |
| <b>Time to screen</b>        | 5 min of parent time<br>1–2 min for provider/staff to score                                                                       | 10–15 min of parent time<br>1–2 min for provider/staff to score                                           |
